# Supplementary material for: A greener approach towards the synthesis of N-heterocyclic thiones and selones using the mechanochemical technique
Source: Royal Society of Chemistry journal article supplement (doi:10.1039/d2dt02322a), 2022-01-01
Supplement: d2dt02322a1.pdf [file d2dt02322a1.pdf]

## Electronic Supporting Information

### **A greener approach towards the synthesis of *N*-heterocyclic thiones and selones using mechanochemical technique**

Siddhartha,<sup>‡</sup> Shalini Rangarajan,<sup>‡</sup> Harish S. Kunchur and Maravanji. S. Balakrishna\*

---

*Phosphorus Laboratory, Department of Chemistry, Indian Institute of Technology Bombay, Powai, Mumbai 400076, India.*

\*Author to whom correspondence should be addressed. E-mail: krishna@chem.iitb.ac.in, msb\_krishna@iitb.ac.in (M. S. Balakrishna); Fax: +91-22-5172-3480/2576-7152.

† Electronic supplementary information (ESI): Tables of structural data and spectroscopic data. CCDC 2189643-2189645. For ESI and crystallographic data in CIF or other electronic format see DOI:

‡ These authors contributed equally to this work.

## Table of content

|                                                         |        |
|---------------------------------------------------------|--------|
| Crystal structure determination of compounds <b>4-6</b> | S2     |
| Crystallographic information for compounds <b>4-6</b>   | S3     |
| Spectral data for isolated compounds                    | S4-S63 |
| Images of balling machine used in the current work      |        |
| References                                              | S63    |

### **Crystal Structure Determination of Compounds 4-6.**

Single crystals of all compounds were mounted on a Cryoloop with a drop of Paratone oil and positioned in the cold nitrogen stream on a Rigaku Saturn724+ (2x2 bin mode) diffractometer (for **5** and **6**) and Bruker D8 Venture (for **4**). The data were reduced using CrysAlisPro 1.171.41.93a (Rigaku Oxford Diffraction, 2020) software. The structures were solved using Olex2<sup>1</sup> with the ShelXT<sup>2</sup> structure solution program using intrinsic phasing and refined with the SHELXL<sup>3</sup> refinement package using least-squares minimization. All non-hydrogen atoms were refined anisotropically. Hydrogen atoms were placed in calculated positions and included as riding contributions with isotropic displacement parameters tied to those of the attached non-hydrogen atoms. The given chemical formula and other crystal data do not take into account the unknown solvent molecule(s). The reflections with error/esd more than 10 were excluded in order to avoid problems related to better refinement of the data. The data completeness is more than 99.8% in most of the cases, which is enough to guarantee a very good refinement of data. The details of X-ray structural determinations are given in Tables S1. Crystallographic data for the structures reported in this paper have been deposited with the Cambridge Crystallographic Data Centre as supplementary publication no. CCDC 2189643 (compound **4**), 2189644 (compound **5**) and 2189645 (compound **6**).

**Table S1** Crystallography details.

|                                               | Comp_4                                              | Comp_5                                             | Comp_6                                              |
|-----------------------------------------------|-----------------------------------------------------|----------------------------------------------------|-----------------------------------------------------|
| Empirical formula                             | C <sub>17</sub> H <sub>17</sub> N <sub>2</sub> OPSe | C <sub>20</sub> H <sub>23</sub> N <sub>2</sub> OPS | C <sub>20</sub> H <sub>23</sub> N <sub>2</sub> OPSe |
| Formula weight                                | 375.25                                              | 370.43                                             | 417.33                                              |
| Temperature/K                                 | 150.15                                              | 150                                                | 150.00                                              |
| Crystal system                                | orthorhombic                                        | monoclinic                                         | monoclinic                                          |
| Space group                                   | Pbca                                                | P2 <sub>1</sub> /c                                 | P2 <sub>1</sub> /c                                  |
| a/Å                                           | 10.9392(3)                                          | 10.6482(15)                                        | 10.6448(7)                                          |
| b/Å                                           | 8.0482(3)                                           | 21.1068(17)                                        | 21.0365(8)                                          |
| c/Å                                           | 37.8833(12)                                         | 9.3551(10)                                         | 9.5229(5)                                           |
| α/°                                           | 90                                                  | 90                                                 | 90                                                  |
| β/°                                           | 90                                                  | 112.860(14)                                        | 113.495(7)                                          |
| γ/°                                           | 90                                                  | 90                                                 | 90                                                  |
| Volume/Å <sup>3</sup>                         | 3335.28(19)                                         | 1937.4(4)                                          | 1955.7(2)                                           |
| Z                                             | 8                                                   | 4                                                  | 4                                                   |
| ρ <sub>calc</sub> /cm <sup>3</sup>            | 1.495                                               | 1.270                                              | 1.417                                               |
| μ/mm <sup>-1</sup>                            | 2.350                                               | 0.260                                              | 2.012                                               |
| F(000)                                        | 1520.0                                              | 784.0                                              | 856.0                                               |
| Crystal size/mm <sup>3</sup>                  | 0.102 × 0.068 ×<br>0.056                            | 0.089 × 0.067 ×<br>0.058                           | 0.098 × 0.068 ×<br>0.056                            |
| 2θ range for data collection/°                | 4.3 to 65.32                                        | 4.152 to 49.994                                    | 3.872 to 62.346                                     |
| Reflections collected                         | 55566                                               | 12285                                              | 16625                                               |
| Independent reflections                       | 5557 [R <sub>int</sub> = 0.0984]                    | 3409 [R <sub>int</sub> =<br>0.1067]                | 5747 [R <sub>int</sub> =<br>0.0409]                 |
| Data/restraints/parameters                    | 5557/0/200                                          | 3409/55/264                                        | 5747/85/265                                         |
| Goodness-of-fit on F <sup>2</sup>             | 1.025                                               | 1.059                                              | 1.046                                               |
| R <sub>1</sub>                                | 0.0528                                              | 0.0752                                             | 0.0476                                              |
| wR <sub>2</sub>                               | 0.1419                                              | 0.1860                                             | 0.1314                                              |
| Largest diff. peak/hole /e<br>Å <sup>-3</sup> | 0.30/-0.83                                          | 0.59/-0.40                                         | 1.57/-0.50                                          |

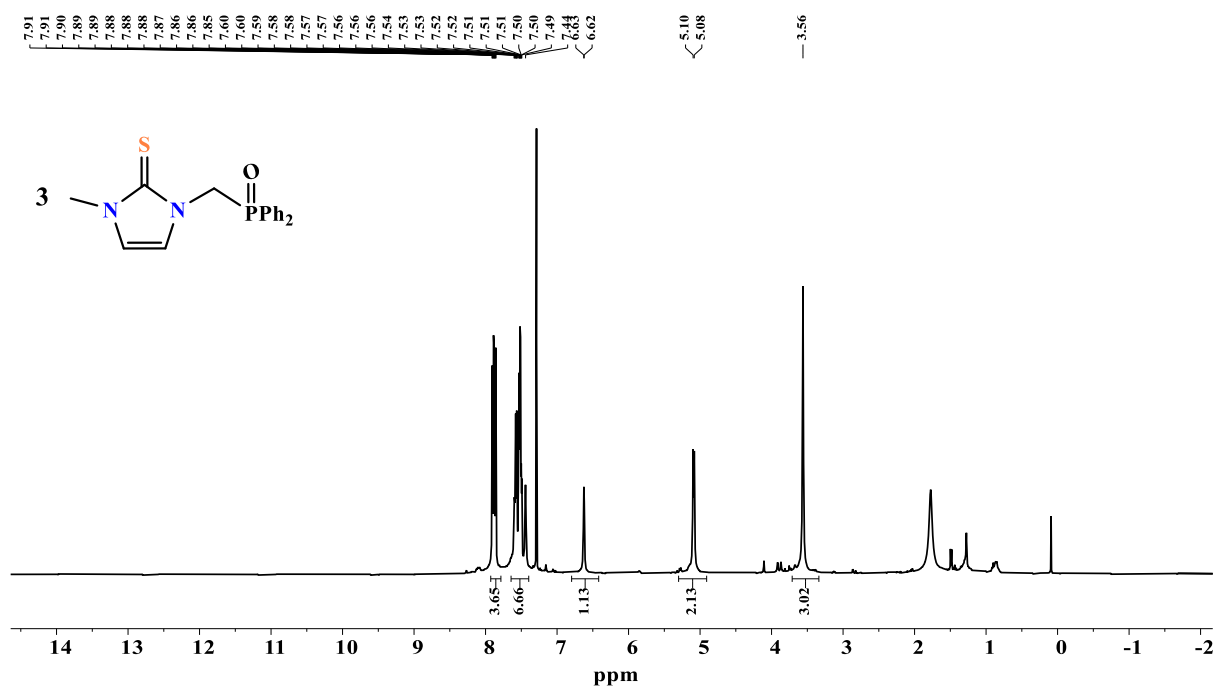

**Fig. S1** <sup>1</sup>H NMR spectrum of **3**.

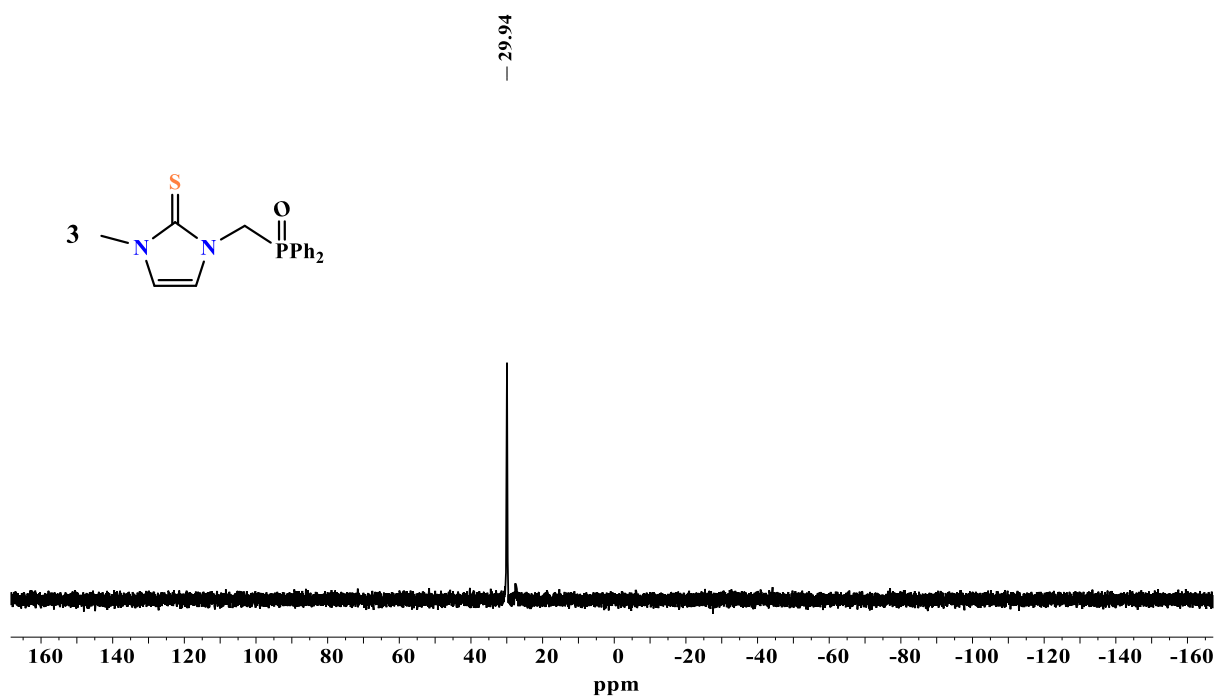

**Fig. S2** <sup>31</sup>P{<sup>1</sup>H} NMR spectrum of **3**.

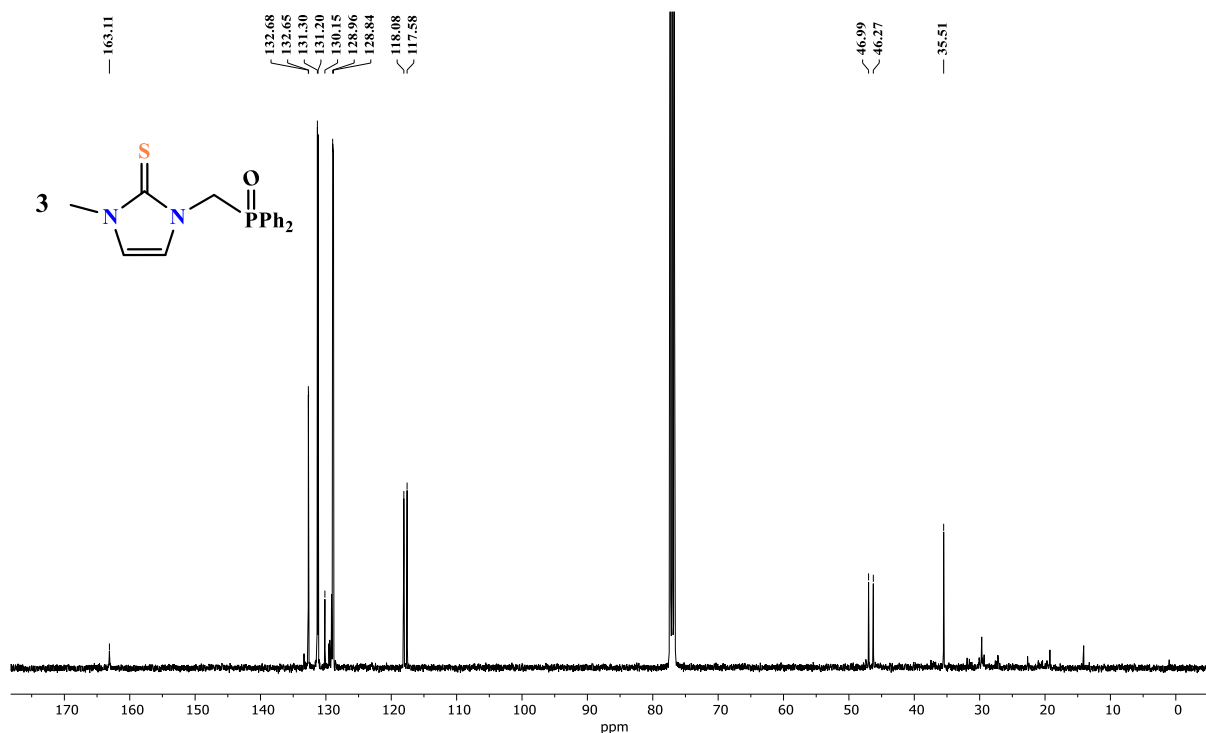

Fig. S3 <sup>13</sup>C NMR spectrum of **3**.

DEPARTMENT OF CHEMISTRY, I.I.T.(B)

Analysis Info

Analysis Name D:\Data\MAR-2020\MSB-SD-HK-79.d  
 Method Tune\_pos\_NAICSI-1000.m  
 Sample Name MSB-SD-HK-79  
 Comment C17H17N2O1P1S1

Acquisition Date 3/12/2020 11:40:07 AM

Operator SJG-out  
 Instrument maXis impact 282001.00081

Acquisition Parameter

|             |          |                       |            |                  |           |
|-------------|----------|-----------------------|------------|------------------|-----------|
| Source Type | ESI      | Ion Polarity          | Positive   | Set Nebulizer    | 0.4 Bar   |
| Focus       | Active   | Set Capillary         | 4000 V     | Set Dry Heater   | 180 °C    |
| Scan Begin  | 50 m/z   | Set End Plate Offset  | -500 V     | Set Dry Gas      | 4.0 l/min |
| Scan End    | 1000 m/z | Set Collision Cell RF | 1200.0 Vpp | Set Divert Valve | Source    |

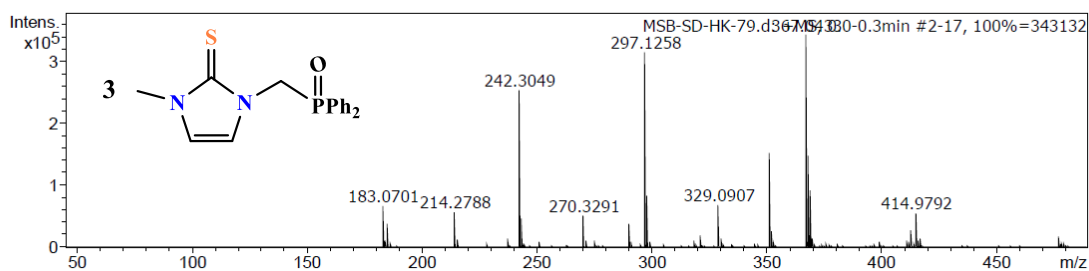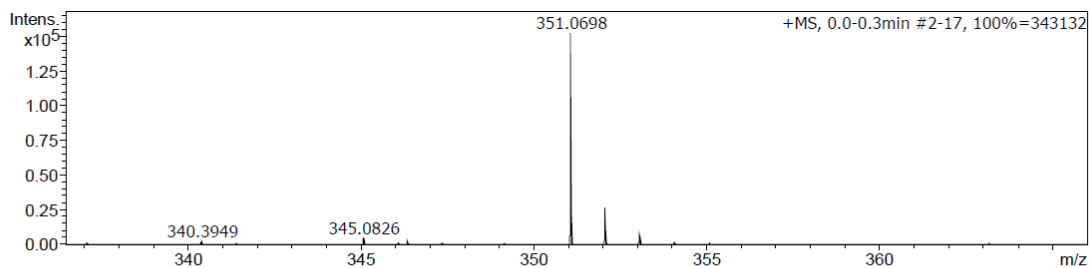

| Meas. m/z | # | Ion Formula   | m/z      | err [ppm] | mSigma | # Sigma | Score  | rdb  | e <sup>-</sup> Conf | N-Rule |
|-----------|---|---------------|----------|-----------|--------|---------|--------|------|---------------------|--------|
| 351.0698  | 1 | C17H17N2NaOPS | 351.0691 | -1.9      | 16.3   | 1       | 100.00 | 10.5 | even                | ok     |

Fig. S4 HRMS spectrum of 3.

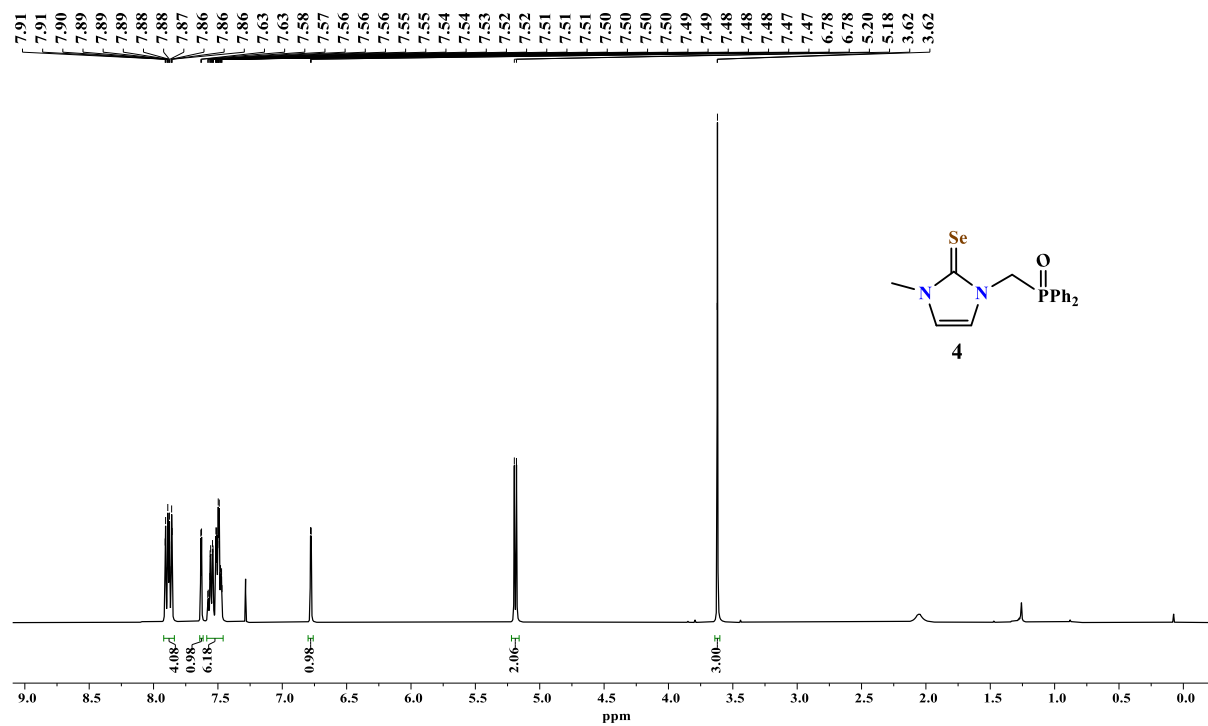

Fig. S5  $^1\text{H}$  NMR spectrum of 4.

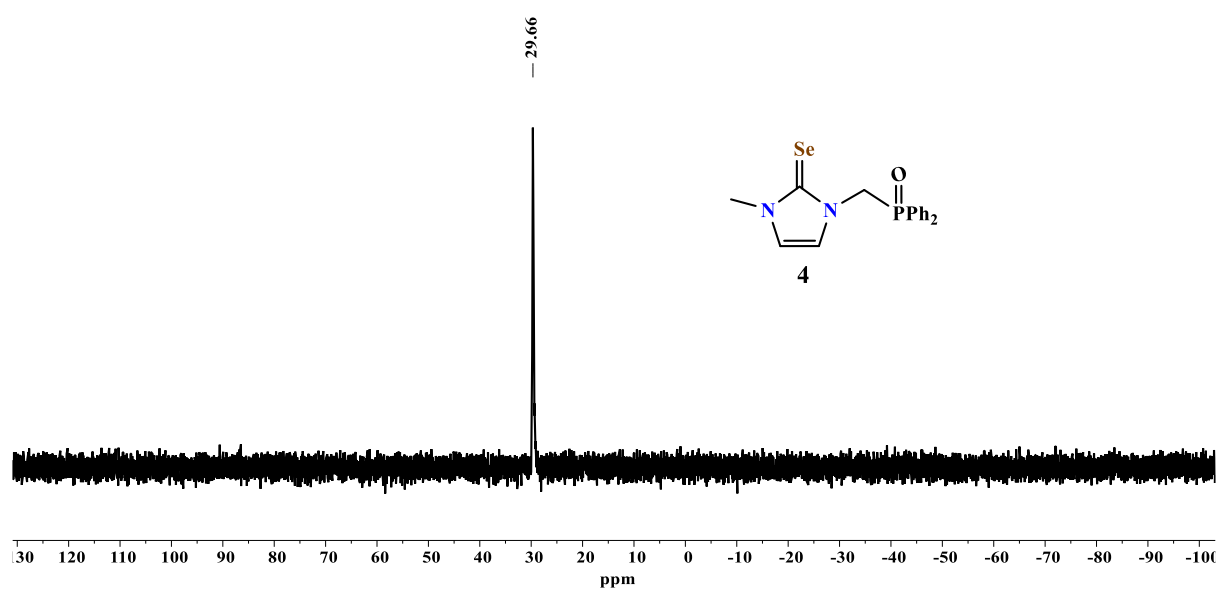

**Fig. S6**  $^{31}\text{P}\{^1\text{H}\}$  NMR spectrum of **4**.

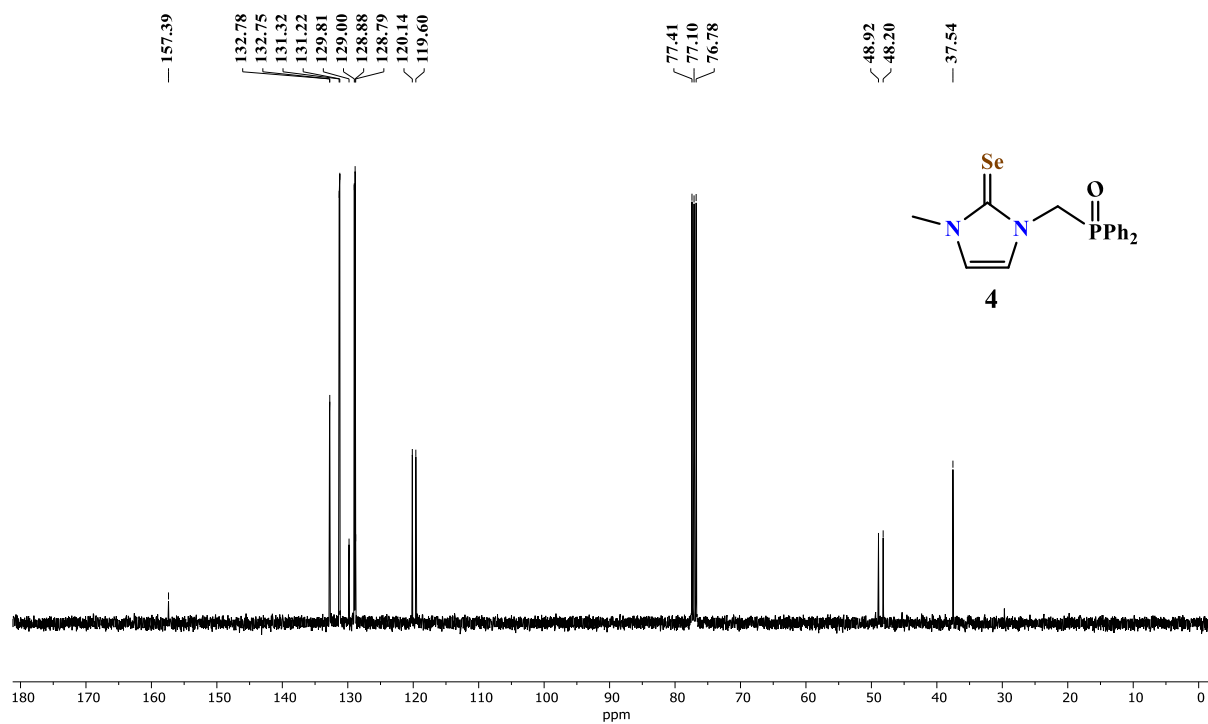

**Fig. S7**  $^{13}\text{C}$  NMR spectrum of **4**.



DEPARTMENT OF CHEMISTRY, I.I.T.(B)

**Analysis Info**

Analysis Name D:\Data\MAR-2020\MSB-SD-HK-80.d  
 Method Tune\_pos\_NAICSI-1000\_Low.m  
 Sample Name MSB-SD-HK-80  
 Comment C17H17N2O1P1Se1

Acquisition Date 3/12/2020 11:32:08 AM

Operator SJG-out  
 Instrument maXis impact 282001.00081

**Acquisition Parameter**

|             |          |                       |            |                  |           |
|-------------|----------|-----------------------|------------|------------------|-----------|
| Source Type | ESI      | Ion Polarity          | Positive   | Set Nebulizer    | 0.3 Bar   |
| Focus       | Active   | Set Capillary         | 4500 V     | Set Dry Heater   | 180 °C    |
| Scan Begin  | 50 m/z   | Set End Plate Offset  | -500 V     | Set Dry Gas      | 4.0 l/min |
| Scan End    | 1000 m/z | Set Collision Cell RF | 1300.0 Vpp | Set Divert Valve | Source    |

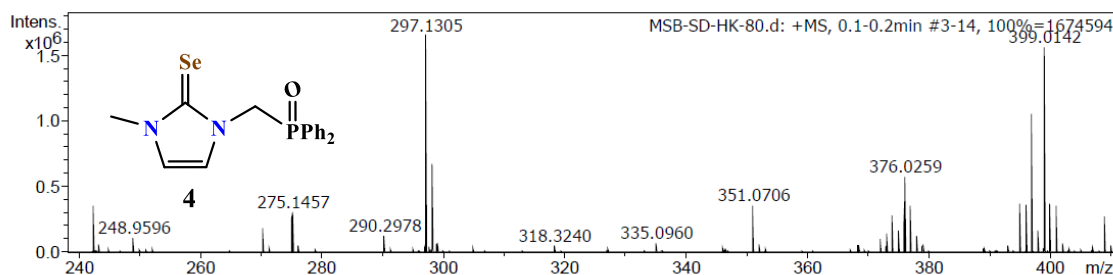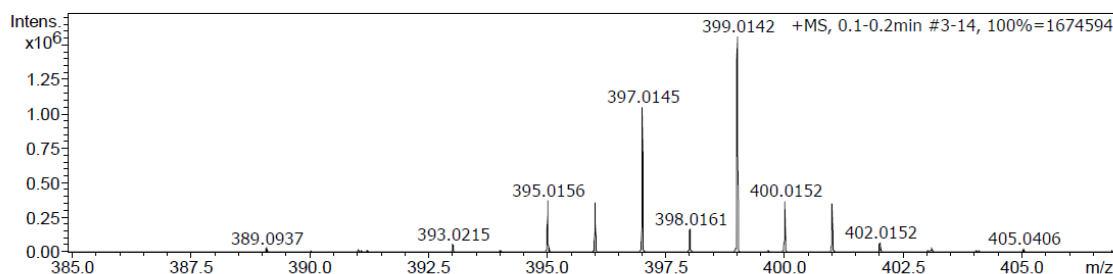

| Meas. m/z | # | Ion Formula    | m/z      | err [ppm] | mSigma | # Sigma | Score  | rdb  | e <sup>-</sup> Conf | N-Rule |
|-----------|---|----------------|----------|-----------|--------|---------|--------|------|---------------------|--------|
| 399.0142  | 1 | C17H17N2NaOPSe | 399.0137 | -1.4      | 59.3   | 1       | 100.00 | 10.5 | even                | ok     |

**Fig. S8** HRMS spectrum of **4**.

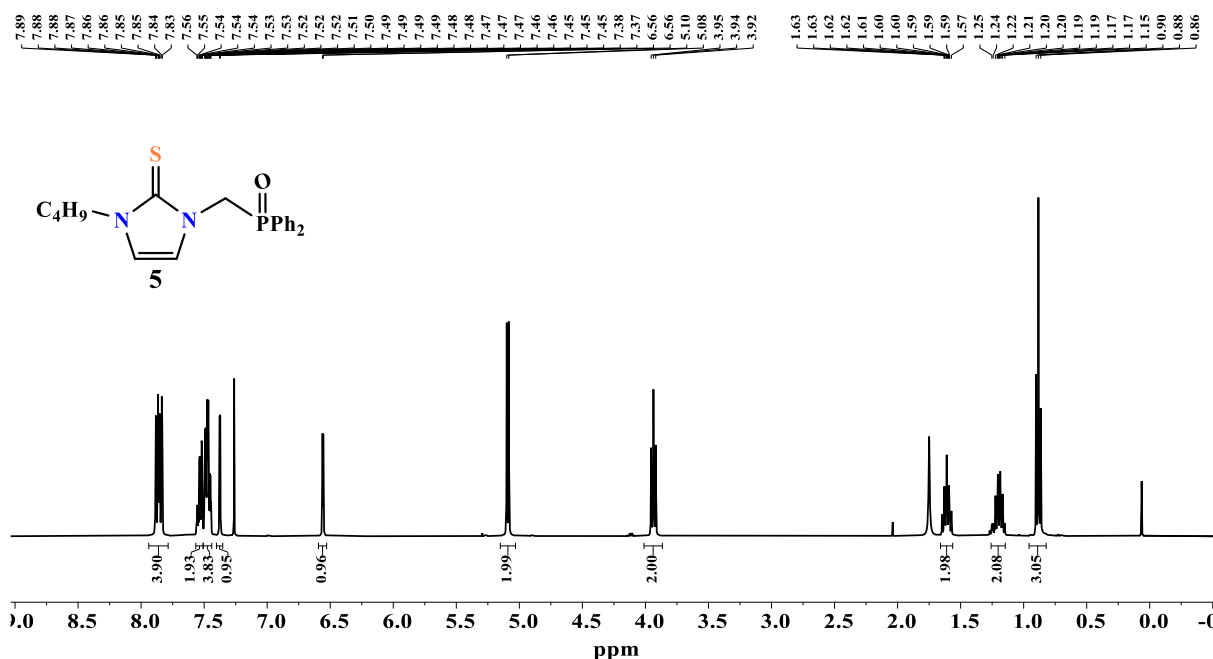

**Fig. S9** <sup>1</sup>H NMR spectrum of **5**.

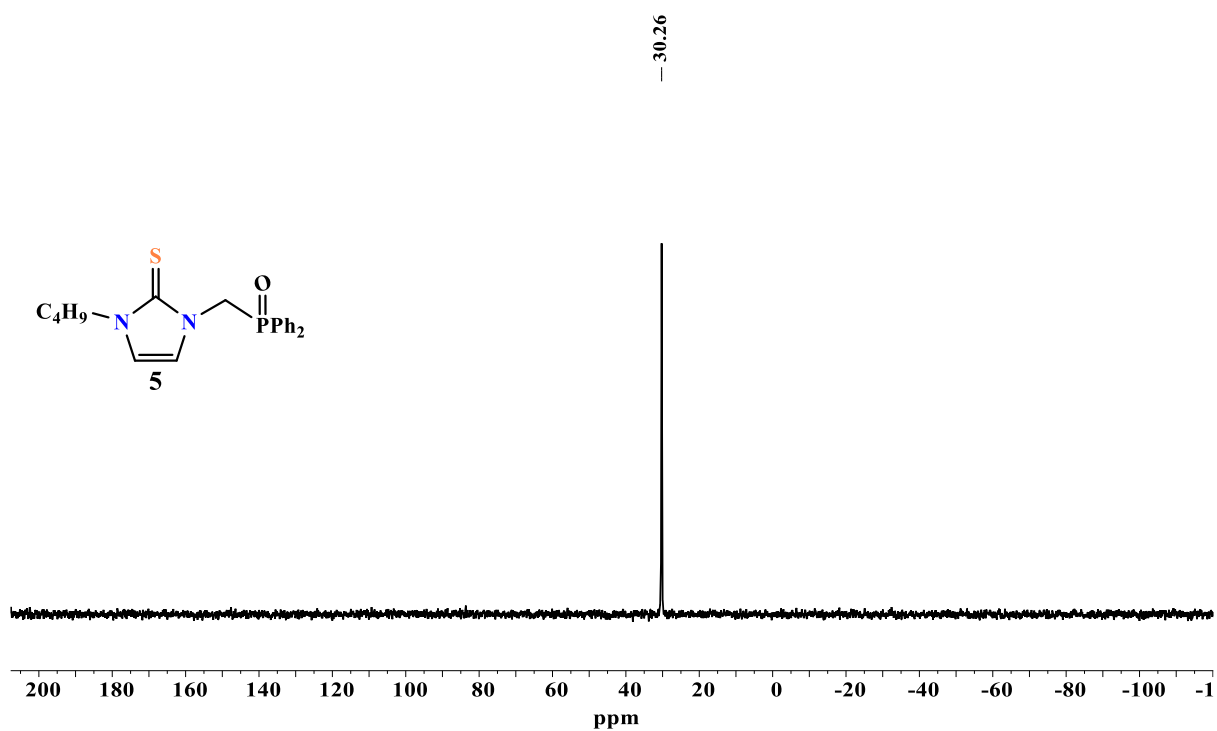

**Fig. S10**  $^{31}\text{P}\{^1\text{H}\}$  NMR spectrum of **5**.

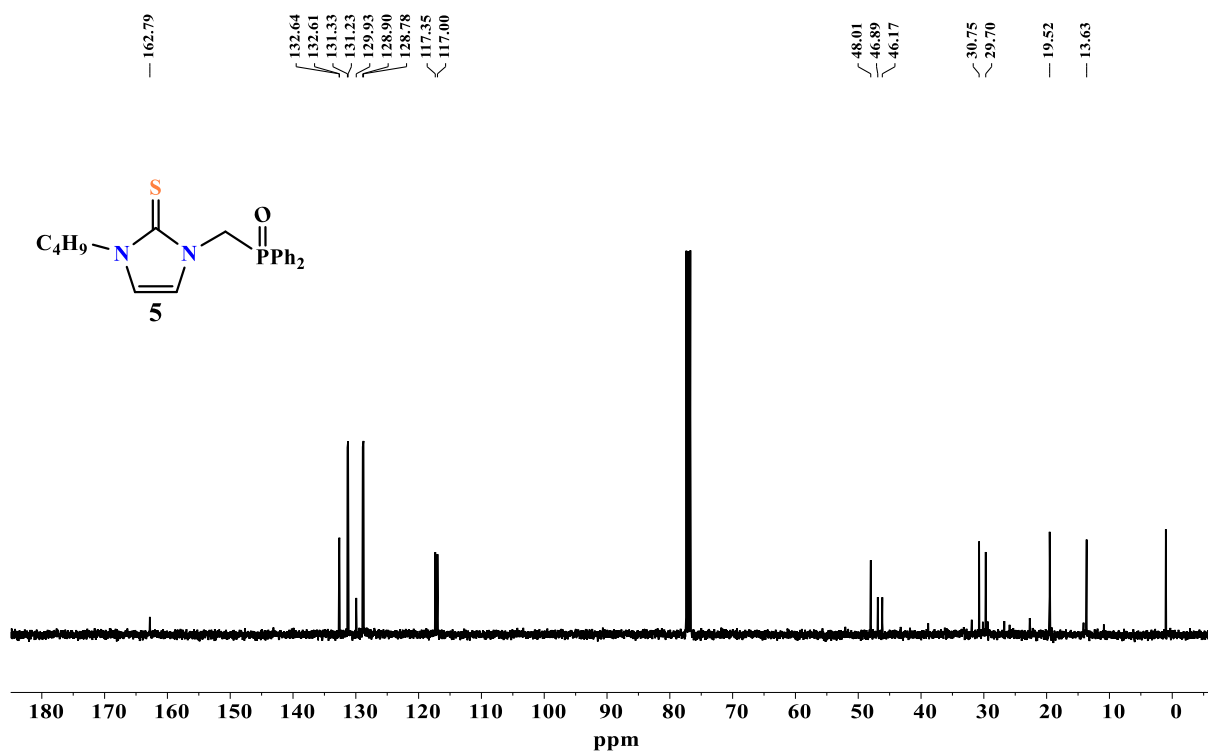

**Fig. S11**  $^{13}\text{C}$  NMR spectrum of **5**.

DEPARTMENT OF CHEMISTRY, I.I.T.(B)

**Analysis Info**

Analysis Name D:\Data\NOV-2019\MSB-SD-9-3-1.d  
 Method Tune\_pos\_NAICSI-1000.m  
 Sample Name MSB-SD-9-3-1  
 Comment C20H23N2O1P1S1

Acquisition Date 11/26/2019 11:41:22 PM  
 Operator INN-IN  
 Instrument maXis impact 282001.00081

**Acquisition Parameter**

|             |          |                       |            |                  |           |
|-------------|----------|-----------------------|------------|------------------|-----------|
| Source Type | ESI      | Ion Polarity          | Positive   | Set Nebulizer    | 0.3 Bar   |
| Focus       | Active   | Set Capillary         | 4500 V     | Set Dry Heater   | 180 °C    |
| Scan Begin  | 50 m/z   | Set End Plate Offset  | -500 V     | Set Dry Gas      | 4.0 l/min |
| Scan End    | 1000 m/z | Set Collision Cell RF | 1200.0 Vpp | Set Divert Valve | Source    |

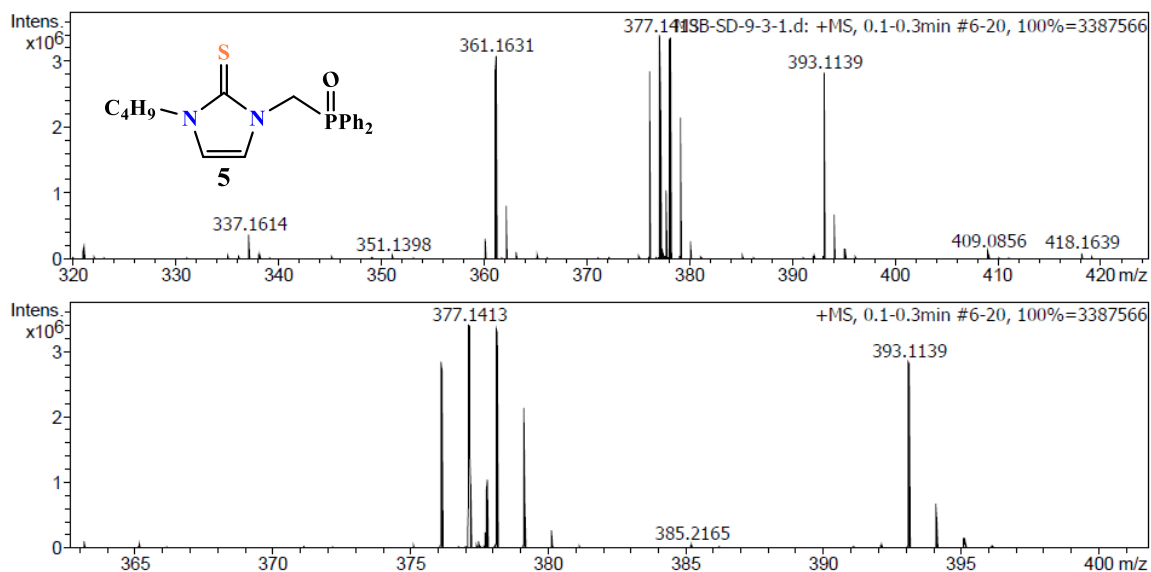

| Meas. m/z | # | Ion Formula   | m/z      | err [ppm] | mSigma | # Sigma | Score  | rdb  | e <sup>-</sup> Conf | N-Rule |
|-----------|---|---------------|----------|-----------|--------|---------|--------|------|---------------------|--------|
| 377.1413  | 1 | C20H23LIN2OPS | 377.1424 | 2.8       | 538.9  | 1       | 100.00 | 10.5 | even                | ok     |

**Fig. S12** HRMS spectrum of **5**.

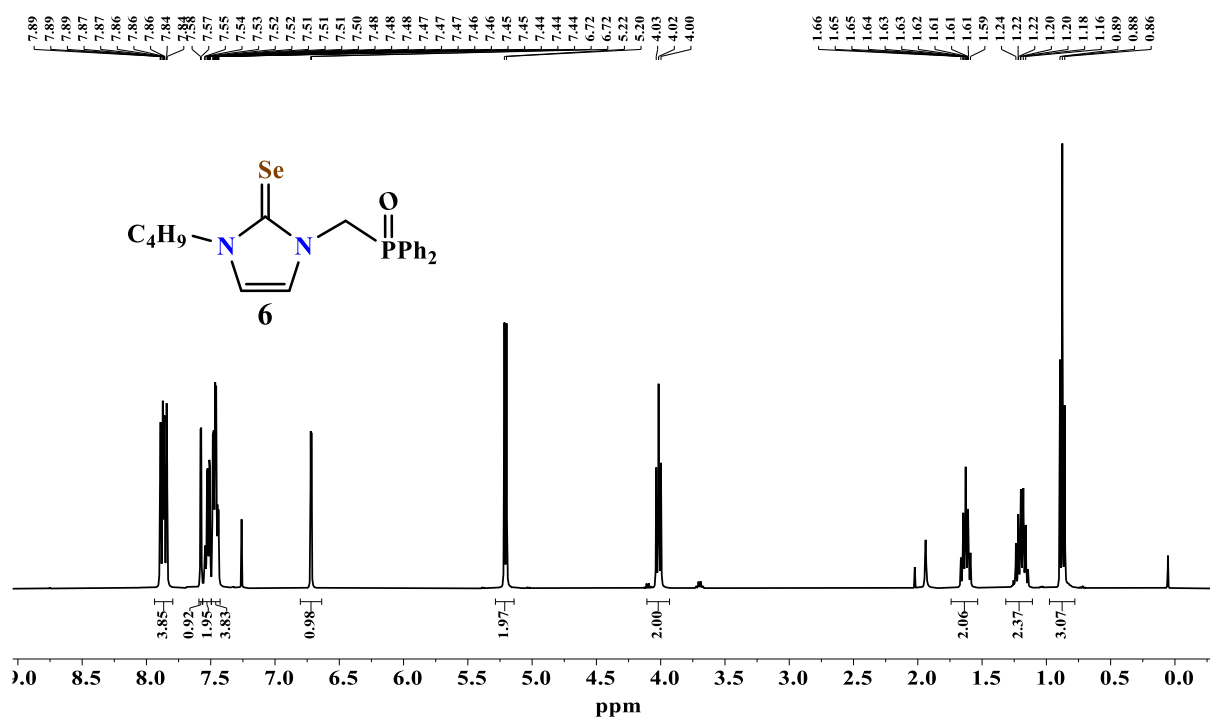

Fig. S13  $^1\text{H}$  NMR spectrum of **6**.

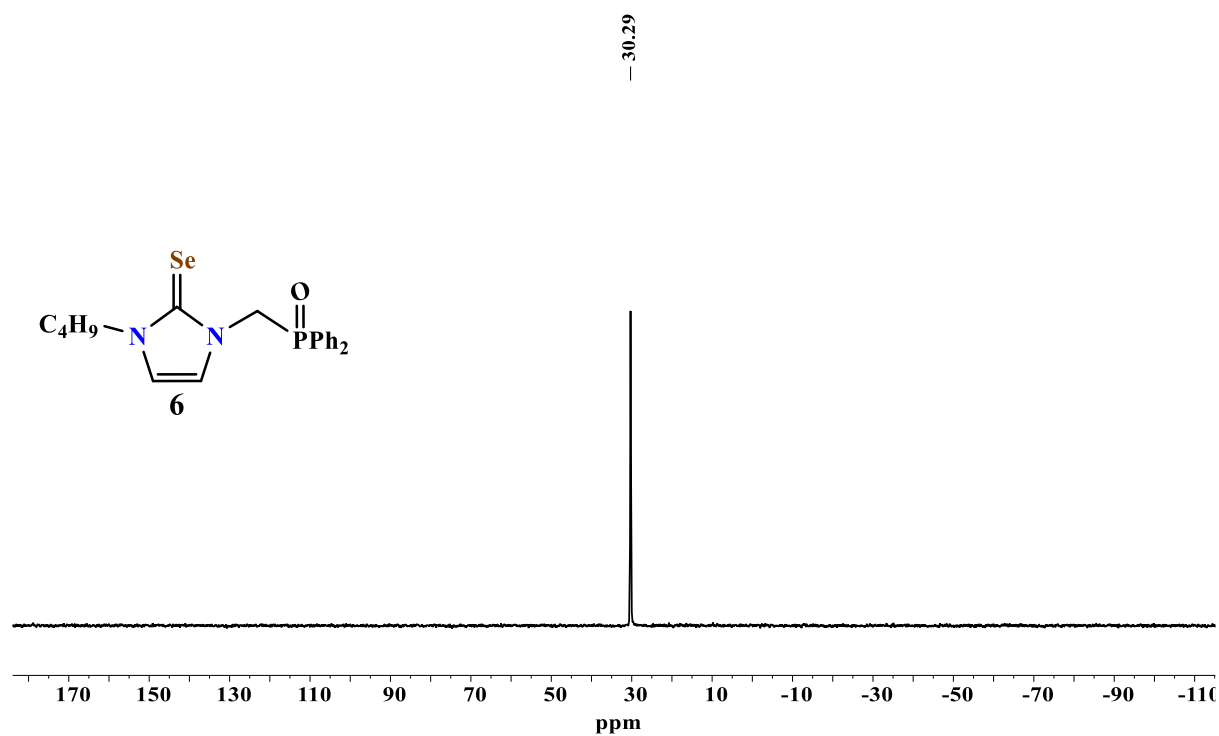

Fig. S14  $^{31}\text{P}\{^1\text{H}\}$  NMR spectrum of **6**.

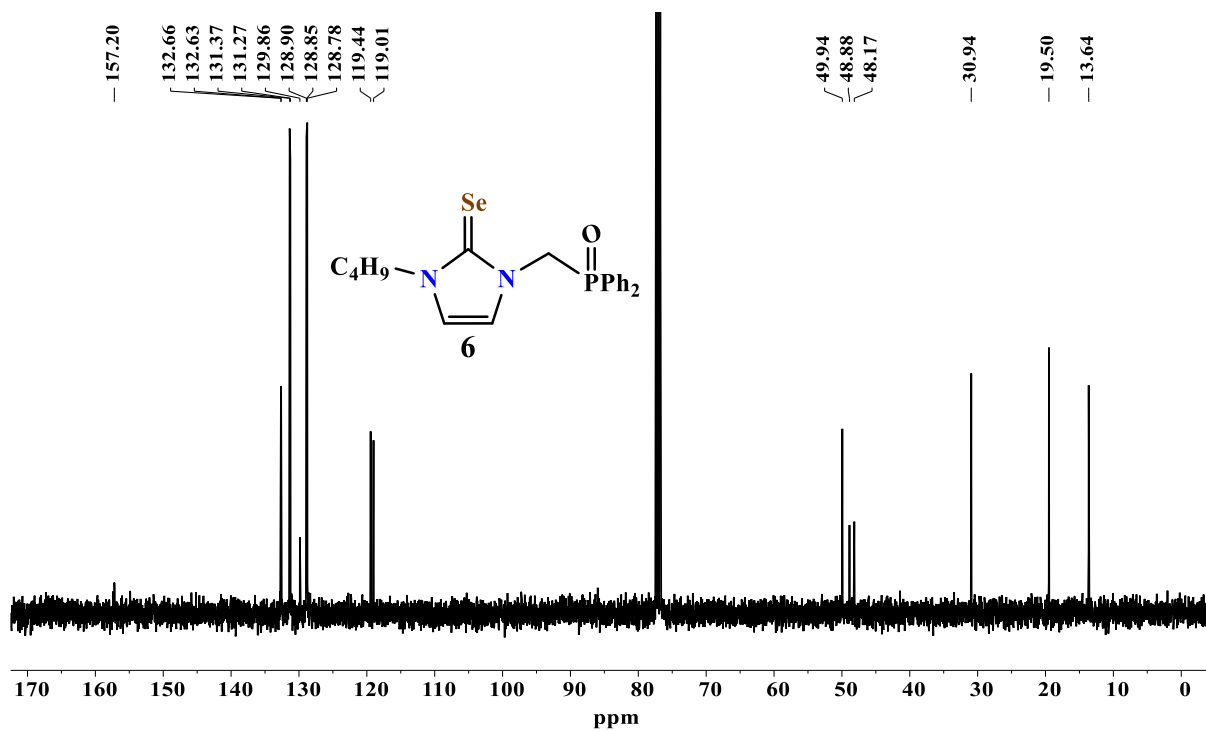

Fig. S15  $^{13}\text{C}$  NMR spectrum of **6**.

DEPARTMENT OF CHEMISTRY, I.I.T.(B)

**Analysis Info**

Analysis Name D:\Data\NOV-2019\MSB-SD-9-8.d  
 Method Tune\_pos\_NAICSI-1000.m  
 Sample Name MSB-SD-9-8  
 Comment C20H23N2O1P1Se

Acquisition Date 11/26/2019 11:48:04 PM

Operator INN-IN  
 Instrument maXis impact 282001.00081

**Acquisition Parameter**

|             |          |                       |            |                  |           |
|-------------|----------|-----------------------|------------|------------------|-----------|
| Source Type | ESI      | Ion Polarity          | Positive   | Set Nebulizer    | 0.3 Bar   |
| Focus       | Active   | Set Capillary         | 4500 V     | Set Dry Heater   | 180 °C    |
| Scan Begin  | 50 m/z   | Set End Plate Offset  | -500 V     | Set Dry Gas      | 4.0 l/min |
| Scan End    | 1000 m/z | Set Collision Cell RF | 1200.0 Vpp | Set Divert Valve | Source    |

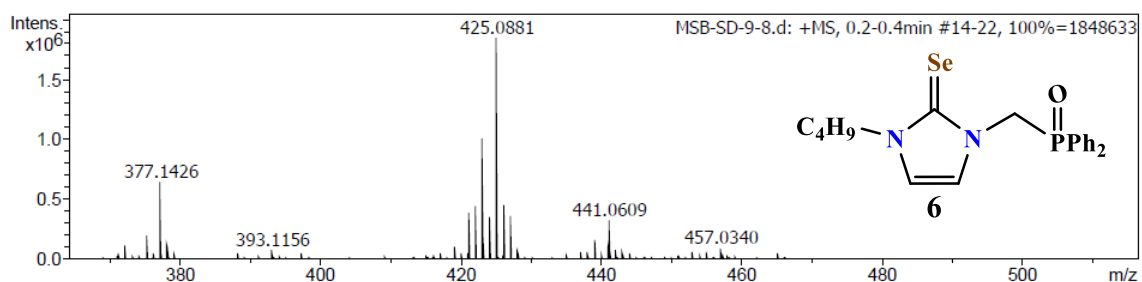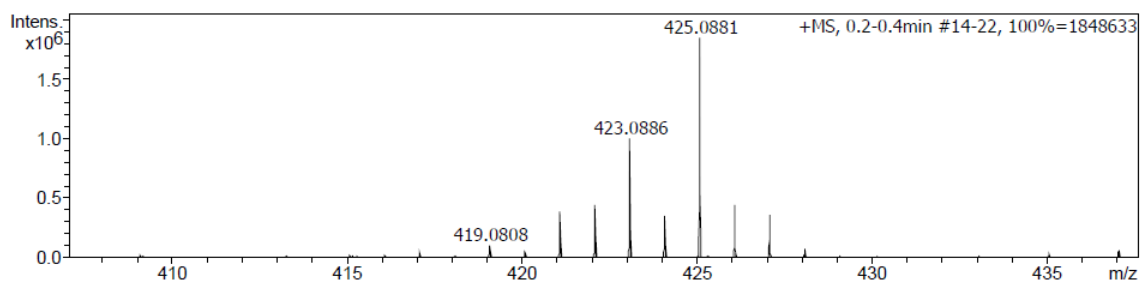

| Meas. m/z | # | Ion Formula    | m/z      | err [ppm] | mSigma | # Sigma | Score  | rdb  | e <sup>-</sup> Conf | N-Rule |
|-----------|---|----------------|----------|-----------|--------|---------|--------|------|---------------------|--------|
| 425.0881  | 1 | C20H23LiN2OPSe | 425.0869 | -2.8      | 11.6   | 1       | 100.00 | 10.5 | even                | ok     |

**Fig. S16** HRMS spectrum of **6**.

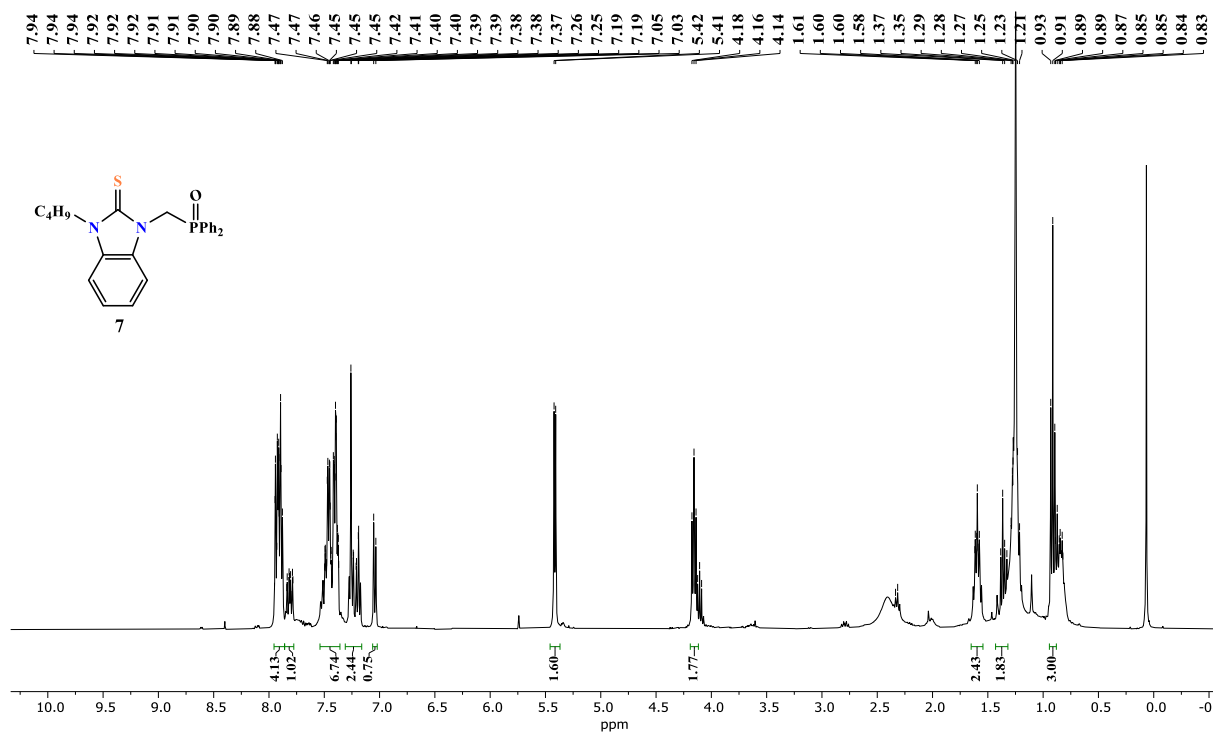

Fig. S17 <sup>1</sup>H NMR spectrum of 7.

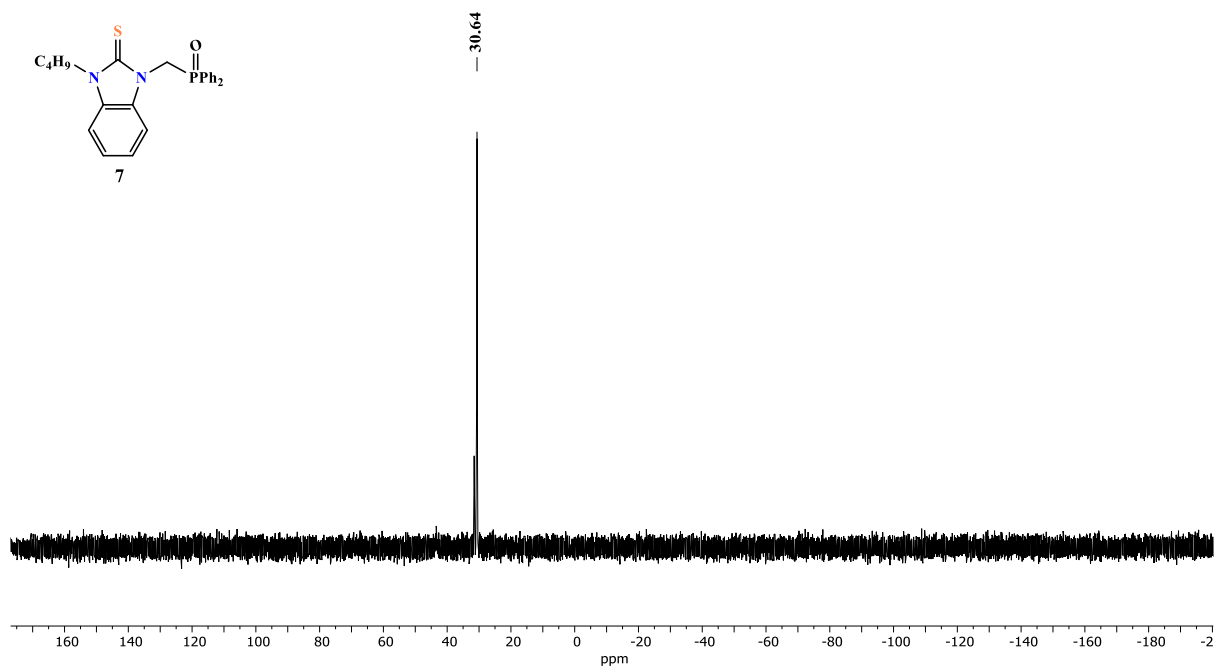

Fig. S18 <sup>31</sup>P{<sup>1</sup>H} NMR spectrum of 7.

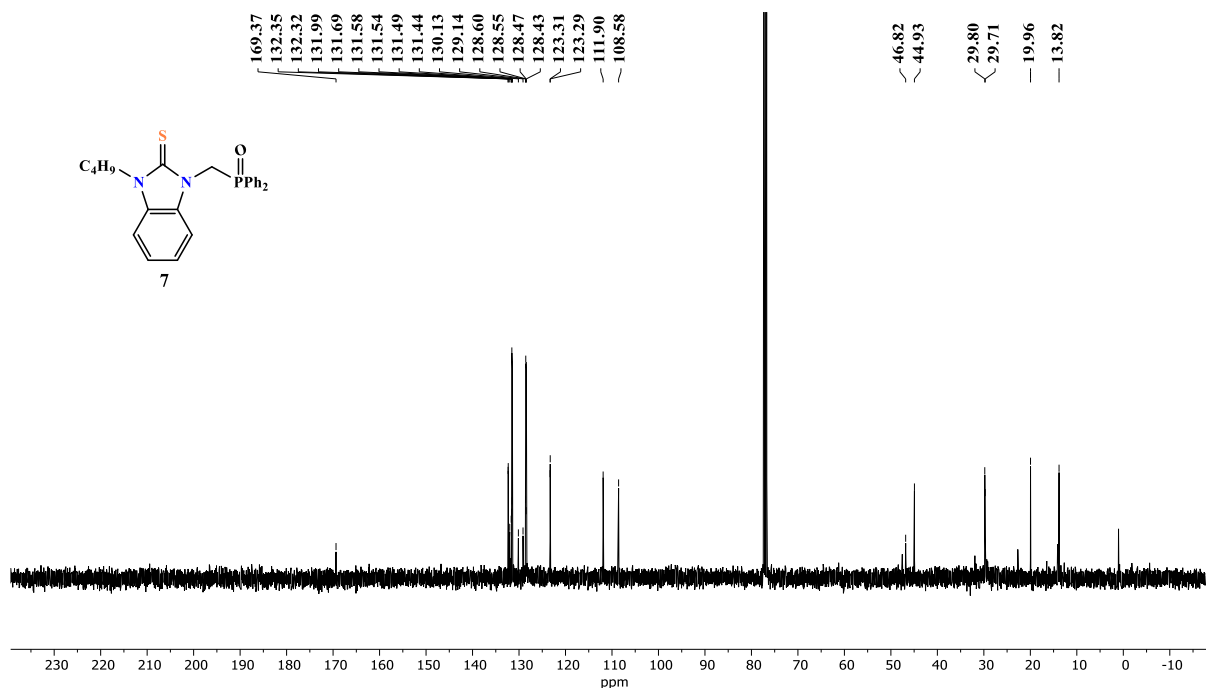

Fig. S19 <sup>13</sup>C NMR spectrum of 7.

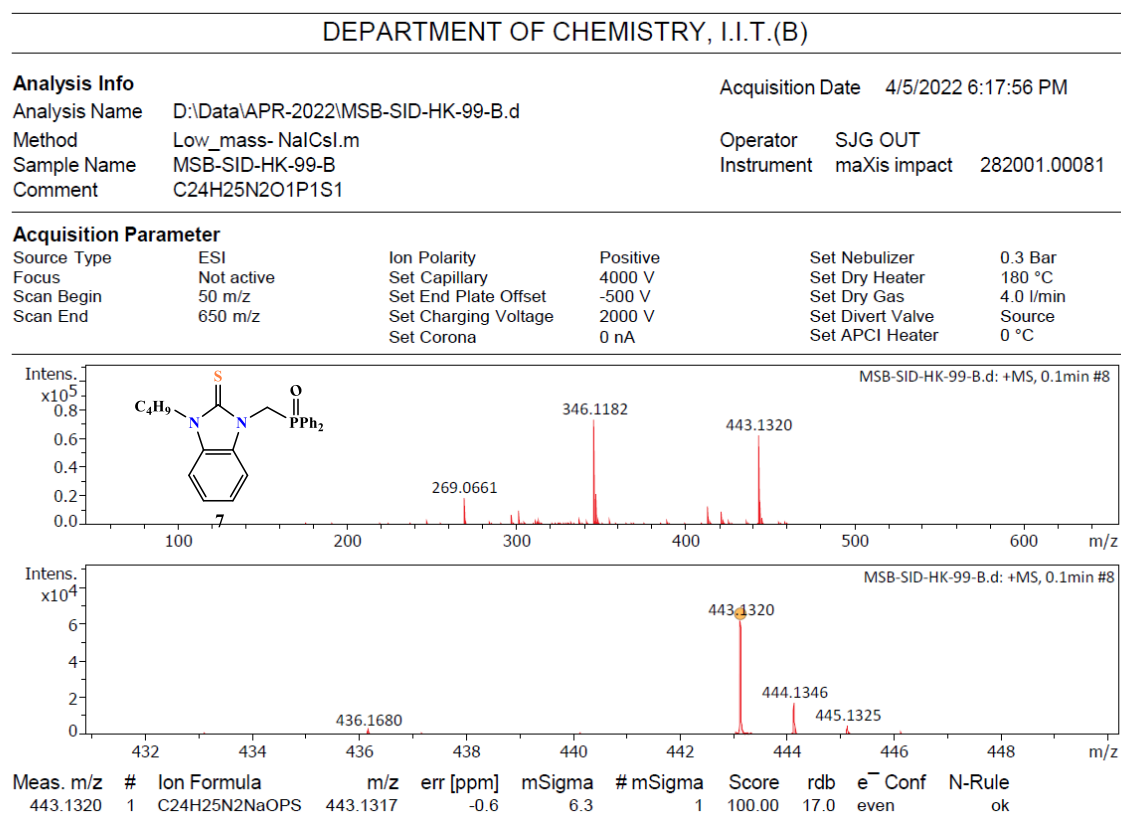

Fig. S20 HRMS spectrum of 7.



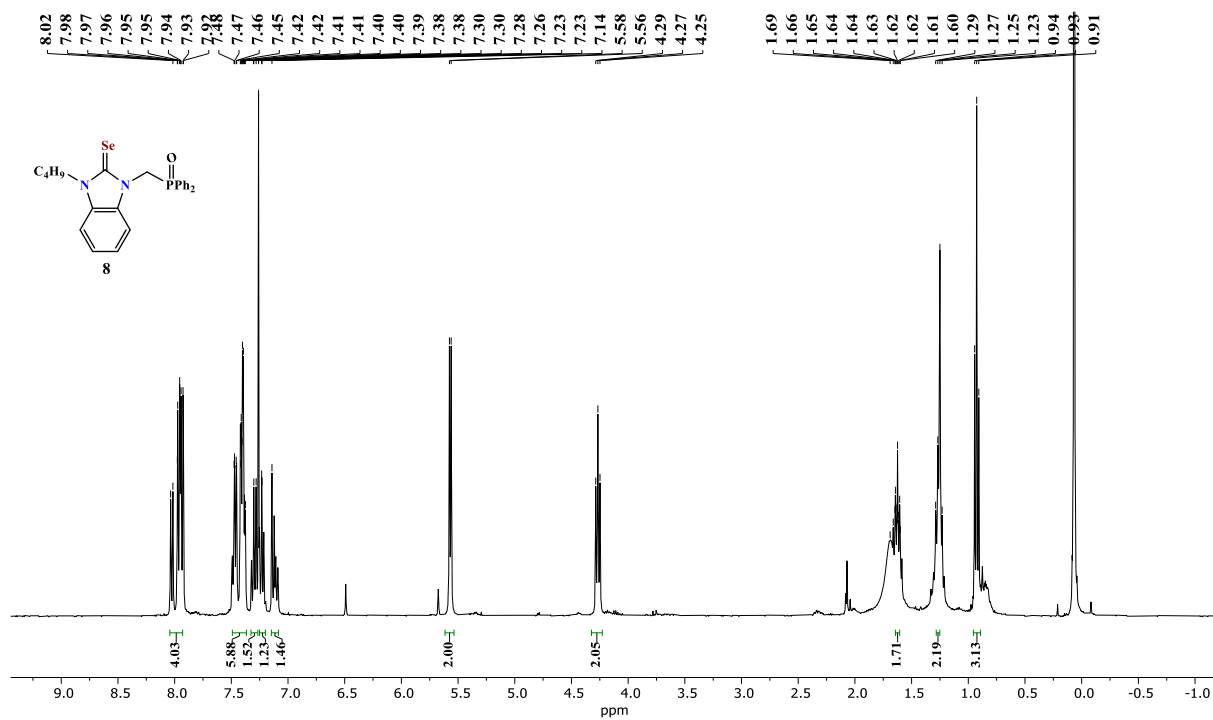

Fig. S21  $^1\text{H}$  NMR spectrum of **8**.

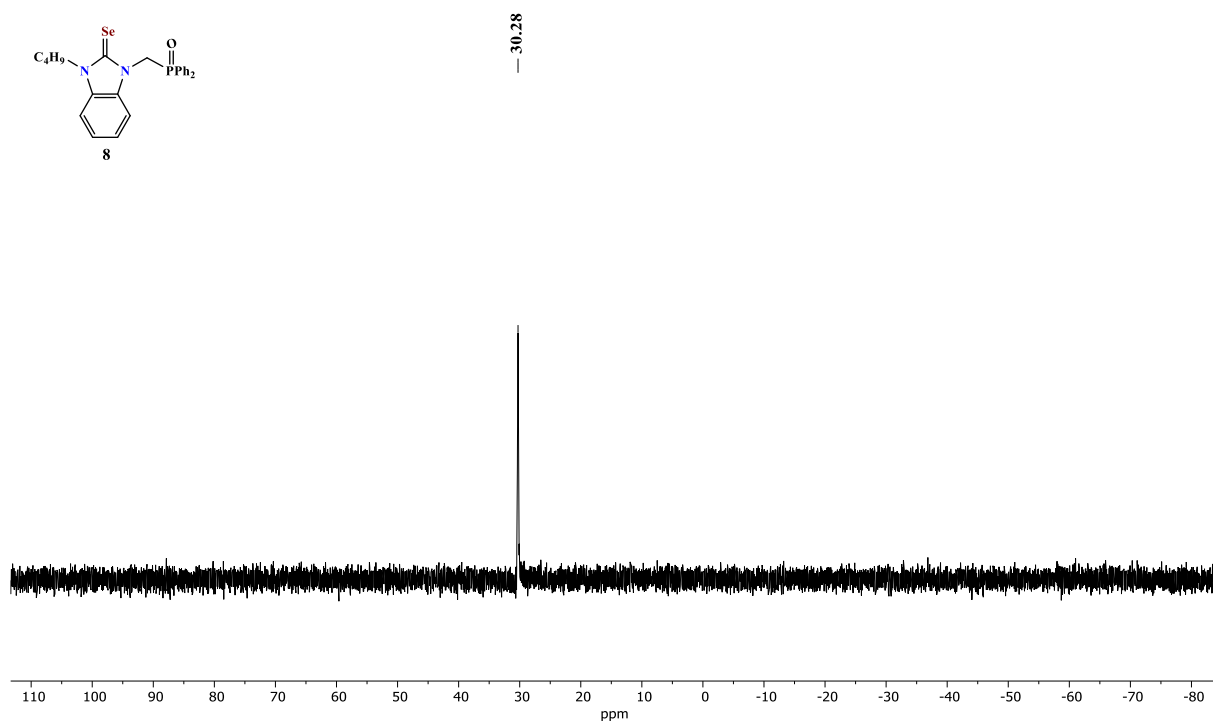

Fig. S22  $^{31}\text{P}\{^1\text{H}\}$  NMR spectrum of **8**.



DEPARTMENT OF CHEMISTRY, I.I.T.(B)

Analysis Info

Analysis Name D:\Data\APR-2022\MSB-SID-HK-100-B.d  
 Method Naformat\_pos\_1000.m  
 Sample Name MSB-SID-HK-100-B  
 Comment C24H25N2O1P1Se1

Acquisition Date 4/5/2022 6:28:23 PM

Operator SJG OUT  
 Instrument maXis impact 282001.00081

Acquisition Parameter

|             |            |                      |          |                  |           |
|-------------|------------|----------------------|----------|------------------|-----------|
| Source Type | ESI        | Ion Polarity         | Positive | Set Nebulizer    | 0.3 Bar   |
| Focus       | Not active | Set Capillary        | 3700 V   | Set Dry Heater   | 180 °C    |
| Scan Begin  | 50 m/z     | Set End Plate Offset | -500 V   | Set Dry Gas      | 4.0 l/min |
| Scan End    | 1000 m/z   | Set Charging Voltage | 2000 V   | Set Divert Valve | Source    |
|             |            | Set Corona           | 0 nA     | Set APCI Heater  | 0 °C      |

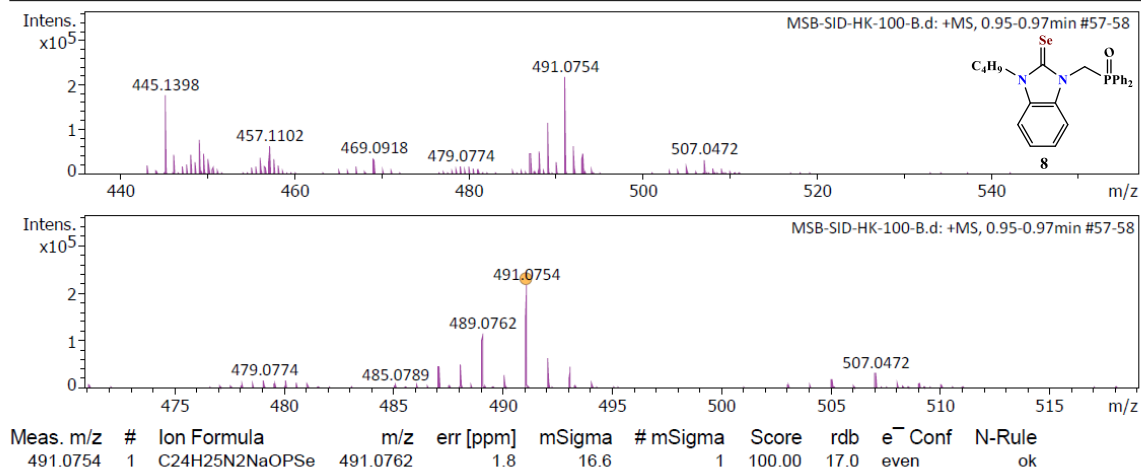

Fig. S24 HRMS spectrum of 8.

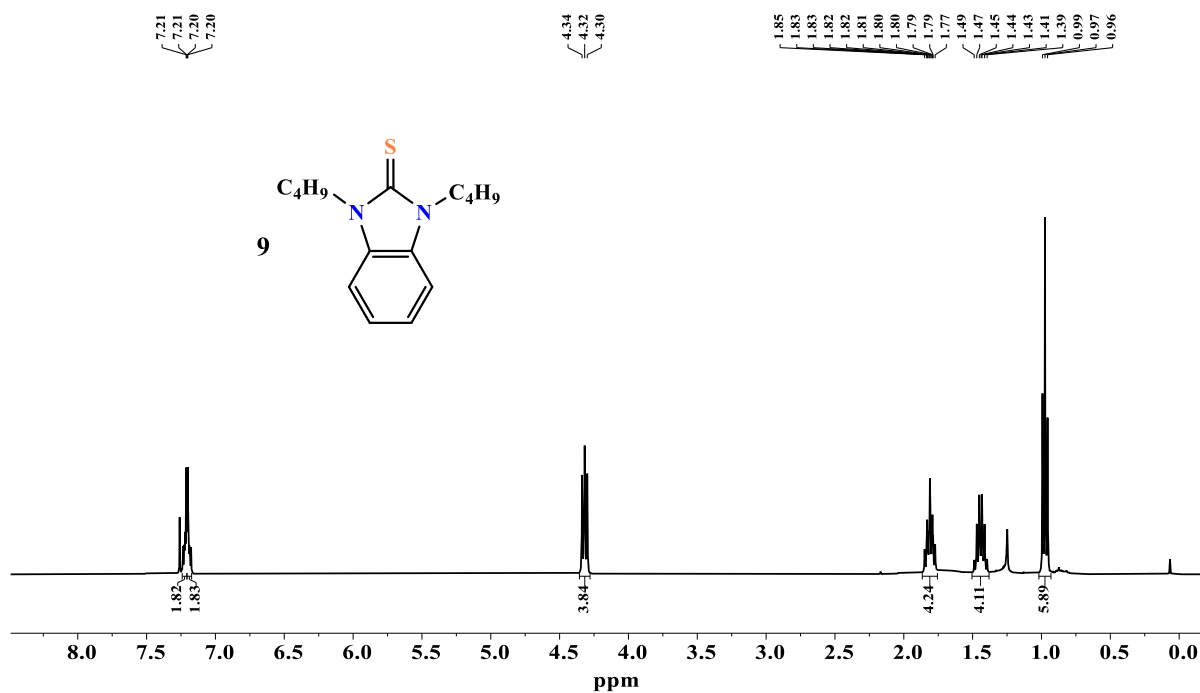

Fig. S25 <sup>1</sup>H NMR spectrum of 9.

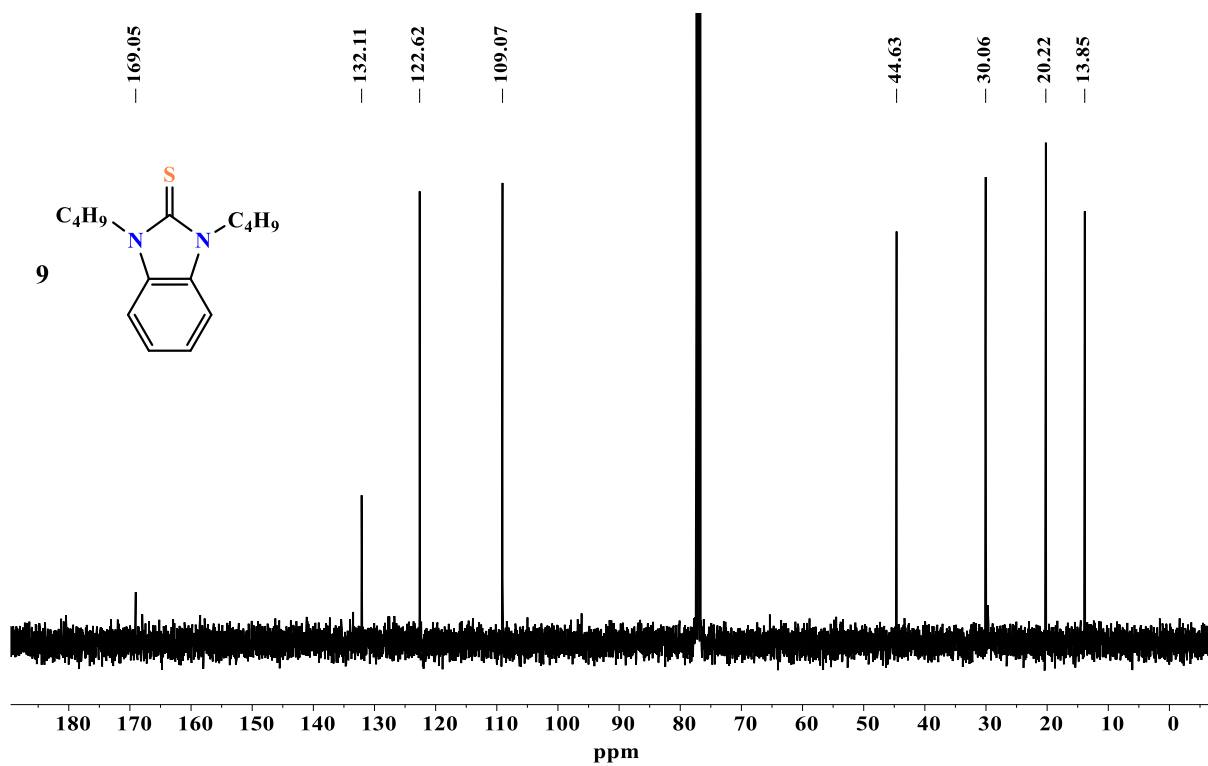

**Fig. S26**  $^{13}\text{C}$  NMR spectrum of **9**.

DEPARTMENT OF CHEMISTRY, I.I.T.(B)

Analysis Info

Analysis Name D:\Data\JAN-2022\MSB-SID-HK-124.d  
 Method Low\_mass- NaICsl.m  
 Sample Name MSB-SID-HK-124  
 Comment C15H22N2Se

Acquisition Date 1/21/2022 8:17:48 PM  
 Operator SJG-IN  
 Instrument maXis impact 282001.00081

Acquisition Parameter

|             |            |                      |          |                  |           |
|-------------|------------|----------------------|----------|------------------|-----------|
| Source Type | ESI        | Ion Polarity         | Positive | Set Nebulizer    | 0.3 Bar   |
| Focus       | Not active | Set Capillary        | 4000 V   | Set Dry Heater   | 180 °C    |
| Scan Begin  | 50 m/z     | Set End Plate Offset | -500 V   | Set Dry Gas      | 4.0 l/min |
| Scan End    | 650 m/z    | Set Charging Voltage | 2000 V   | Set Divert Valve | Source    |
|             |            | Set Corona           | 0 nA     | Set APCI Heater  | 0 °C      |

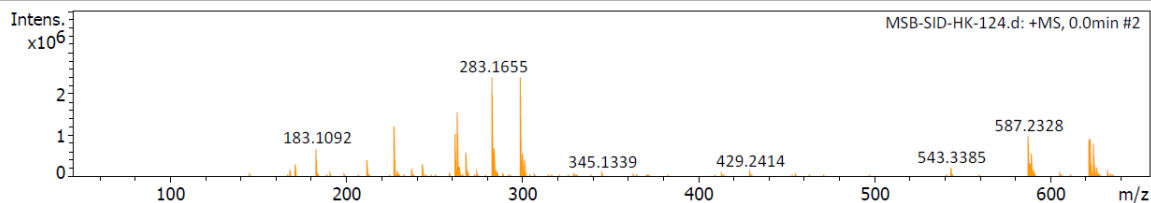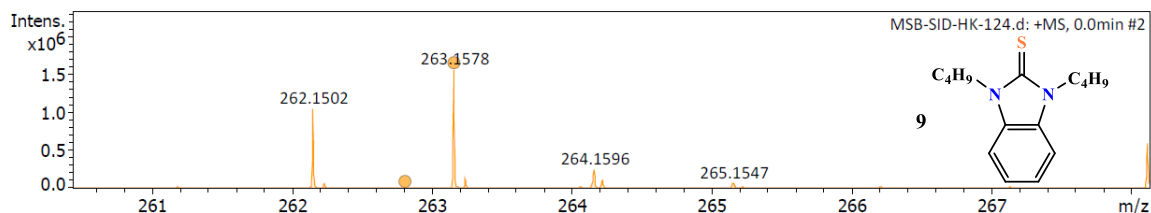

| Meas. m/z | # | Ion Formula | m/z      | err [ppm] | mSigma | # mSigma | Score  | rdb | e <sup>-</sup> Conf | N-Rule |
|-----------|---|-------------|----------|-----------|--------|----------|--------|-----|---------------------|--------|
| 263.1578  | 1 | C15H23N2S   | 263.1576 | -0.7      | 15.7   | 1        | 100.00 | 8.0 | even                | ok     |

Fig. S27 HRMS spectrum of 9.

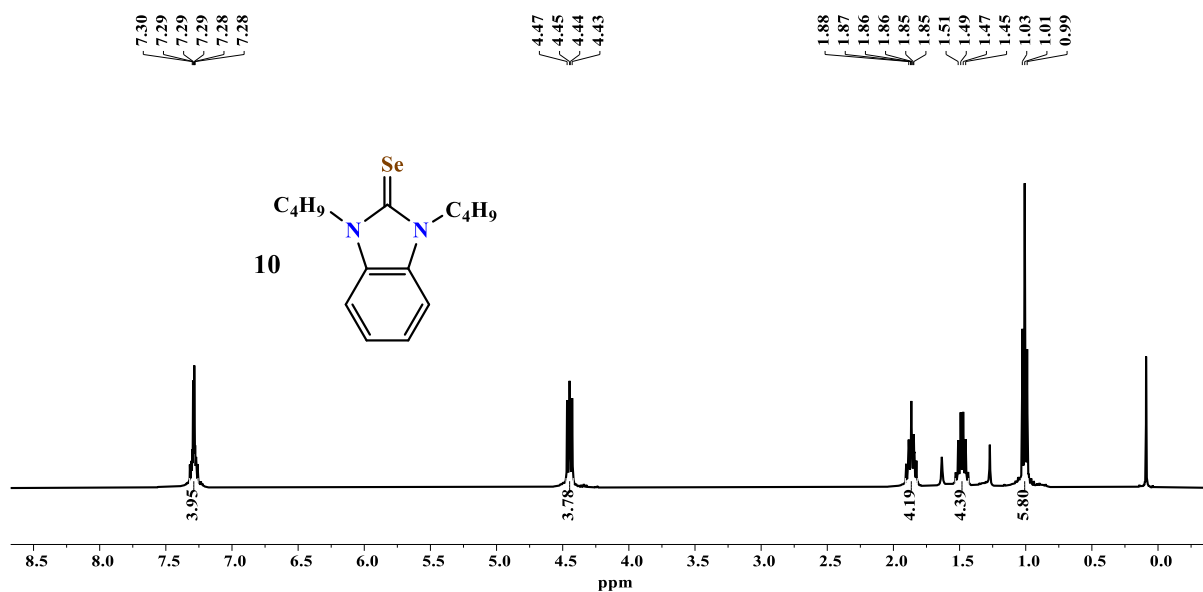

Fig. S28 <sup>1</sup>H NMR spectrum of 10.

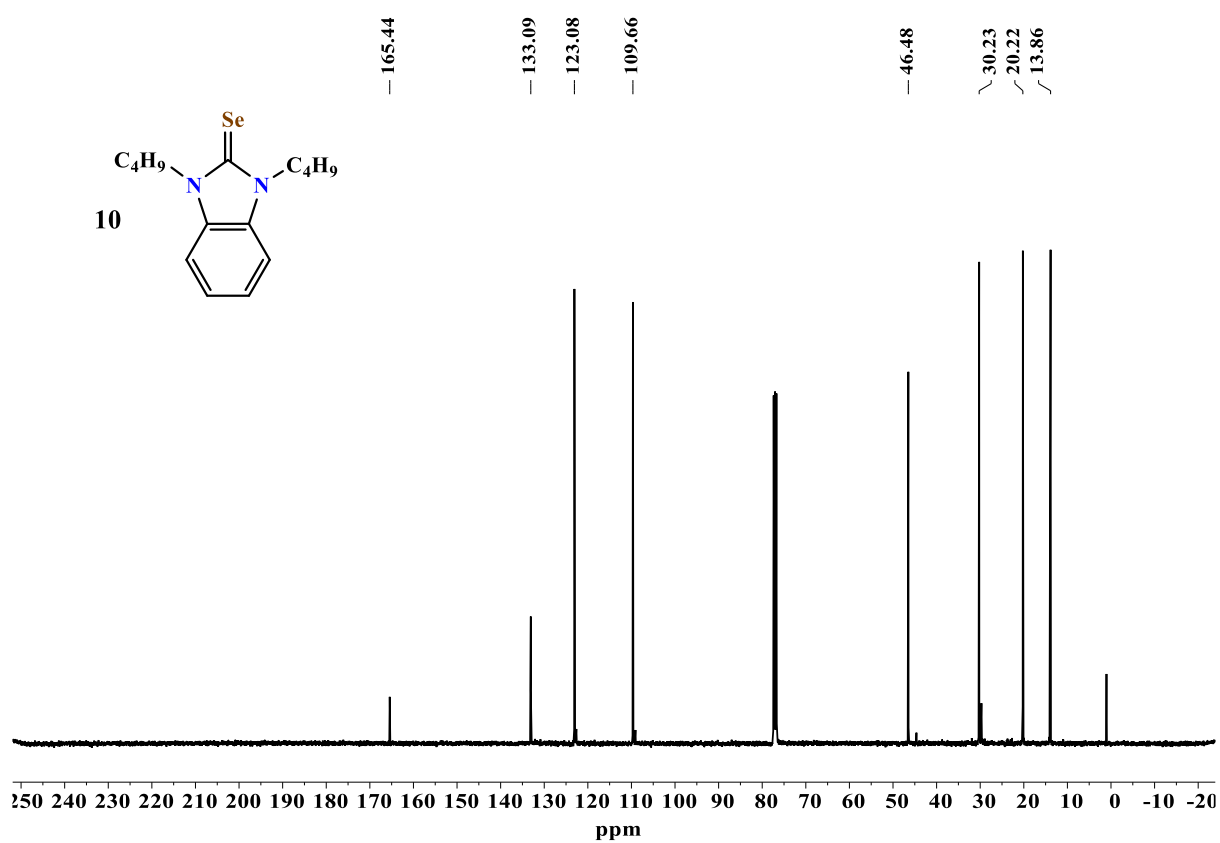

**Fig. S29**  $^{13}\text{C}$  NMR spectrum of **11**.

DEPARTMENT OF CHEMISTRY, I.I.T.(B)

Analysis Info

Analysis Name D:\Data\AUG 2021\MSB-SID-HK-125.d  
 Method Low\_mass- NAF.m  
 Sample Name MSB-SID-HK-125  
 Comment C19H30N2Se

Acquisition Date 8/12/2021 2:30:52 AM

Operator MSB-OUT  
 Instrument maXis impact 282001.00081

Acquisition Parameter

|             |         |                      |          |                  |           |
|-------------|---------|----------------------|----------|------------------|-----------|
| Source Type | ESI     | Ion Polarity         | Positive | Set Nebulizer    | 0.3 Bar   |
| Focus       | Active  | Set Capillary        | 3200 V   | Set Dry Heater   | 180 °C    |
| Scan Begin  | 50 m/z  | Set End Plate Offset | -500 V   | Set Dry Gas      | 4.0 l/min |
| Scan End    | 600 m/z | Set Charging Voltage | 2000 V   | Set Divert Valve | Source    |
|             |         | Set Corona           | 0 nA     | Set APCI Heater  | 0 °C      |

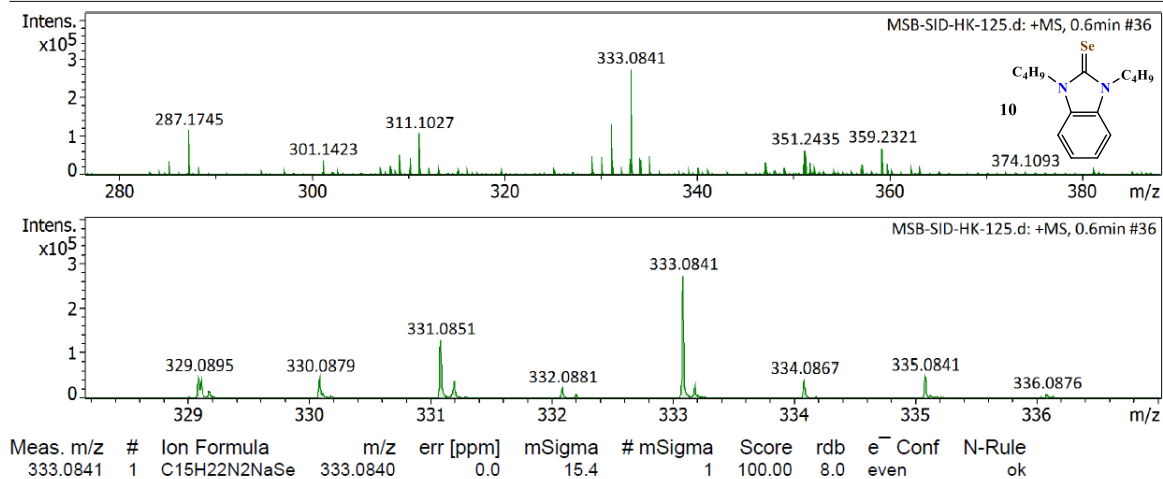

Fig. S30 HRMS spectrum of 10.

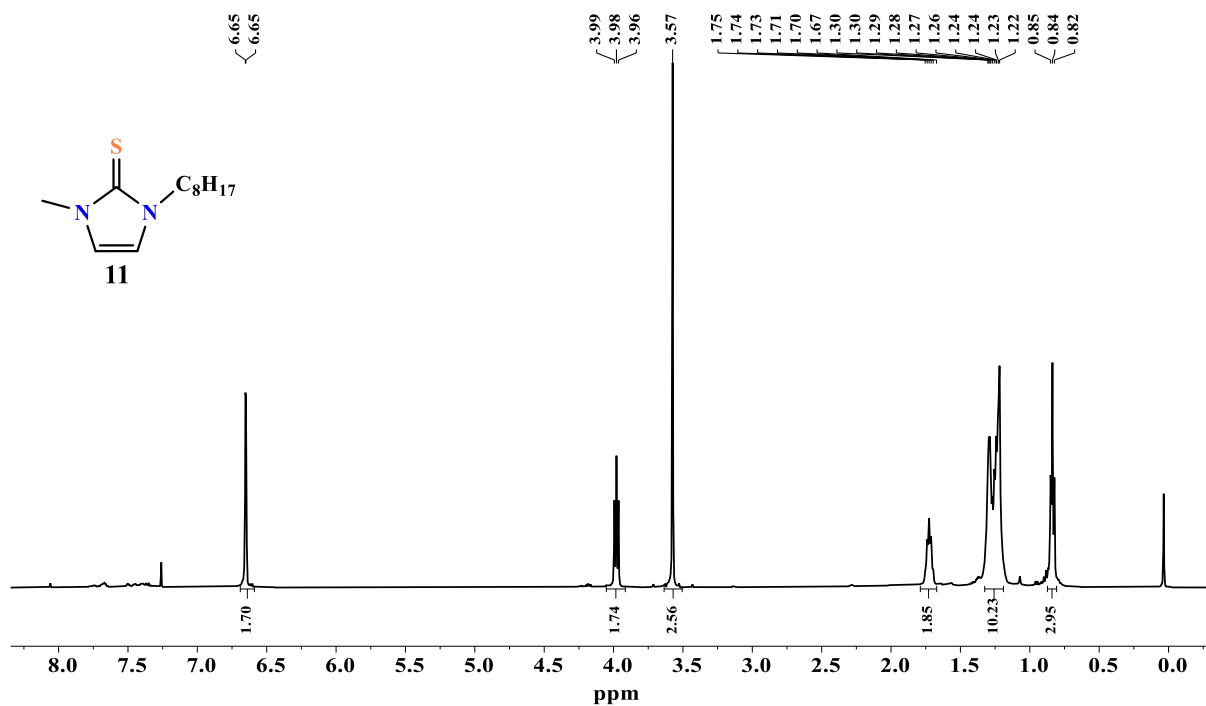

Fig. S31  $^1\text{H}$  NMR spectrum of **11**.

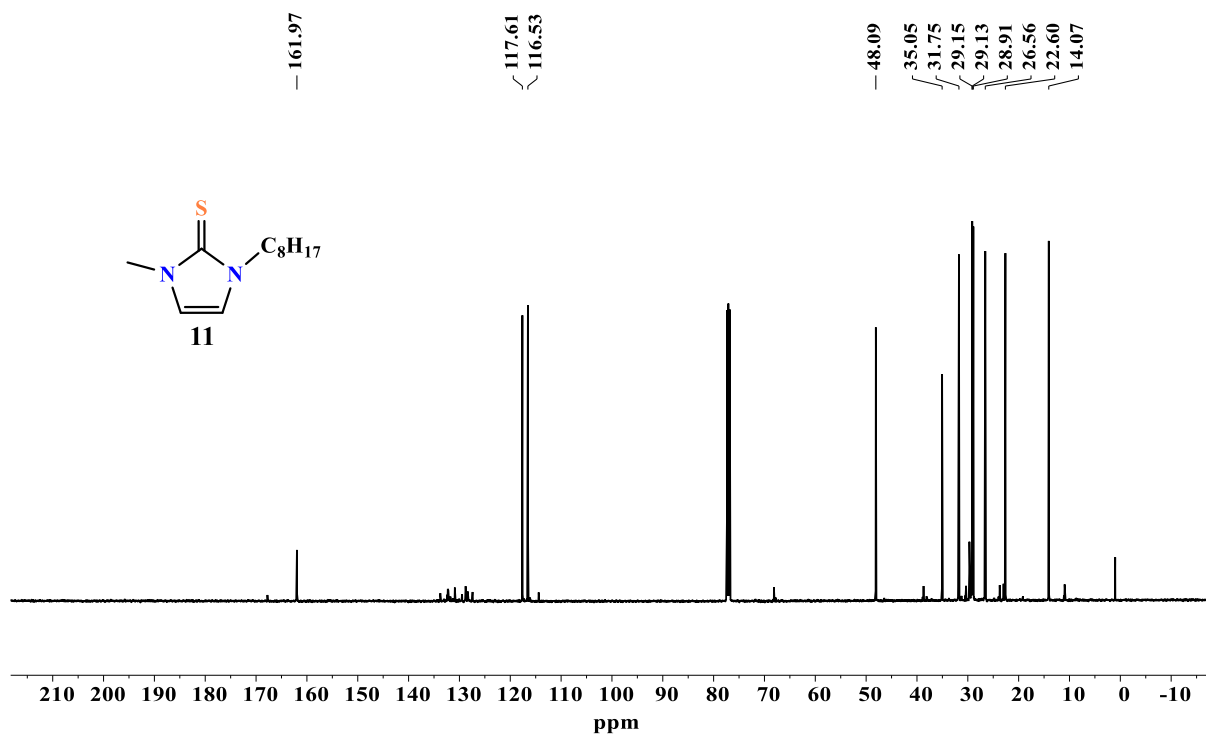

Fig. S32  $^{13}\text{C}$  NMR spectrum of **11**.



DEPARTMENT OF CHEMISTRY, I.I.T.(B)

Analysis Info

Analysis Name D:\Data\DEC-2019\MSB-SD-51.d  
 Method Tune\_pos\_500\_NAF.m  
 Sample Name MSB-SD-51  
 Comment C12H22N2S

Acquisition Date 12/10/2019 10:57:49 PM

Operator PG SRD OUT  
 Instrument maXis impact 282001.00081

Acquisition Parameter

|             |         |                       |           |                  |           |
|-------------|---------|-----------------------|-----------|------------------|-----------|
| Source Type | ESI     | Ion Polarity          | Positive  | Set Nebulizer    | 0.3 Bar   |
| Focus       | Active  | Set Capillary         | 4500 V    | Set Dry Heater   | 180 °C    |
| Scan Begin  | 50 m/z  | Set End Plate Offset  | -500 V    | Set Dry Gas      | 4.0 l/min |
| Scan End    | 500 m/z | Set Collision Cell RF | 800.0 Vpp | Set Divert Valve | Source    |

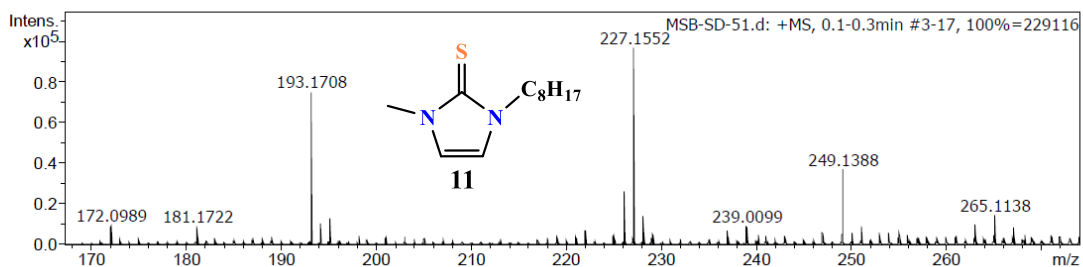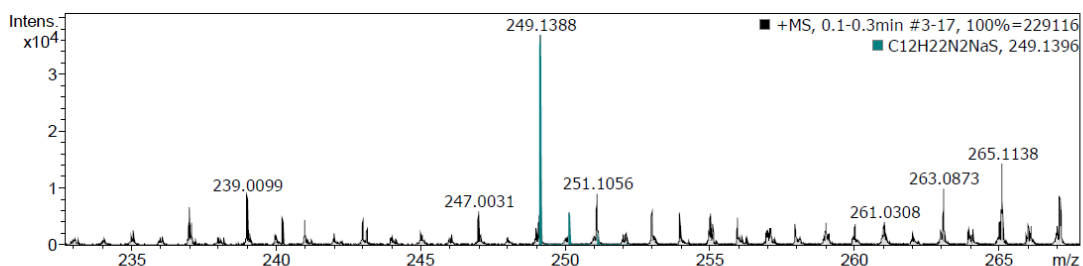

| Meas. m/z | # | Ion Formula | m/z      | err [ppm] | mSigma | # Sigma | Score  | rdb | e <sup>-</sup> Conf | N-Rule |
|-----------|---|-------------|----------|-----------|--------|---------|--------|-----|---------------------|--------|
| 249.1388  | 1 | C12H22N2NaS | 249.1396 | -3.1      | 30.3   | 1       | 100.00 | 2.5 | even                | ok     |

Fig. S33 HRMS spectrum of 11.

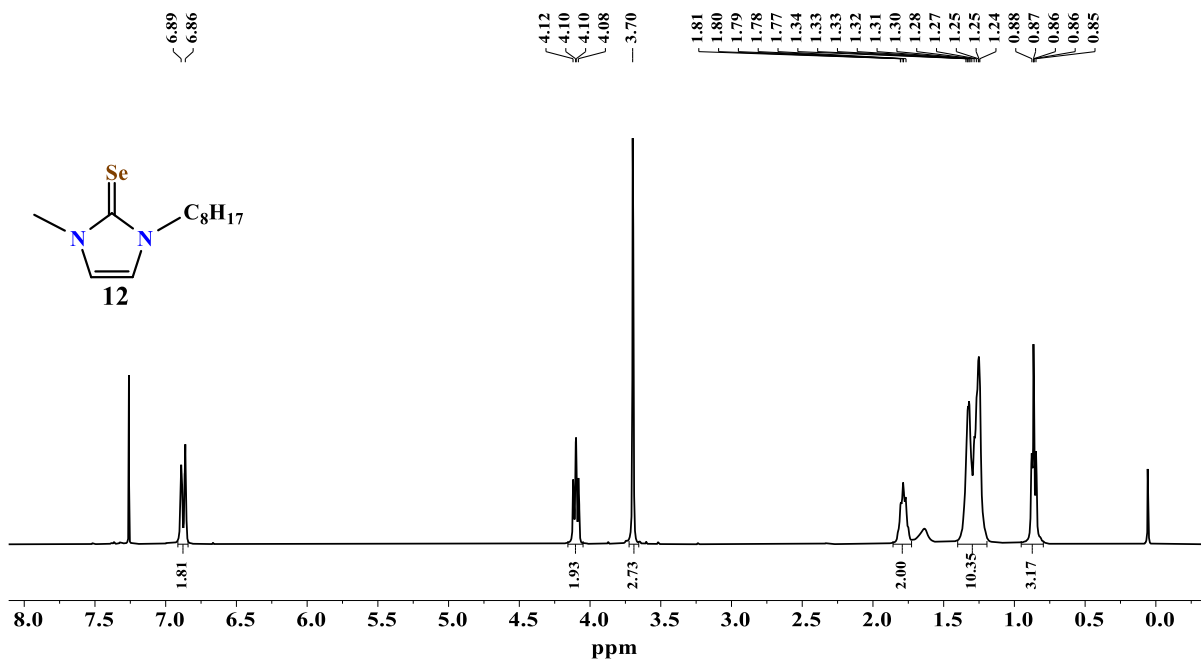

**Fig. S34**  $^1\text{H}$  NMR spectrum of **12**.

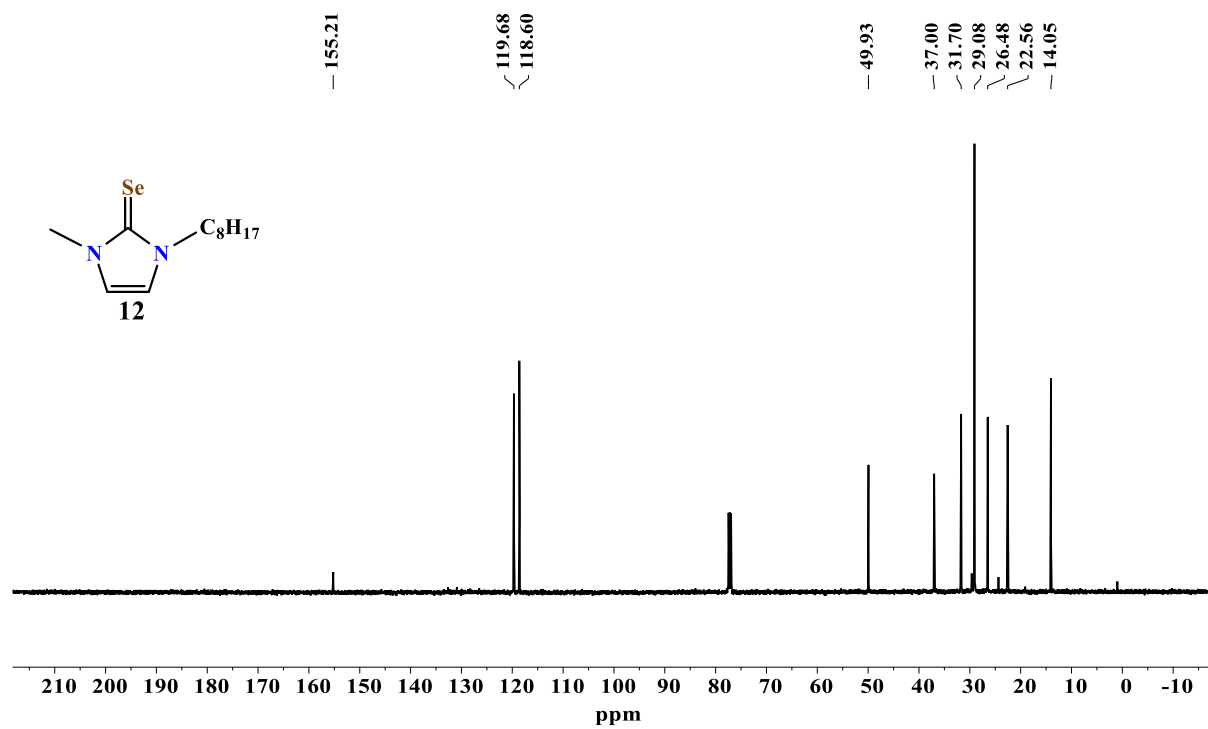

**Fig. S35**  $^{13}\text{C}$  NMR spectrum of **12**.

DEPARTMENT OF CHEMISTRY, I.I.T.(B)

**Analysis Info**

Analysis Name D:\Data\MAR-2020\MSB-SD-HK-54.d  
 Method Tune\_pos\_NAICSI-1000.m  
 Sample Name MSB-SD-HK-54  
 Comment C12H22N2Se1

Acquisition Date 3/12/2020 11:48:10 AM

Operator SJG-out  
 Instrument maXis impact 282001.00081

**Acquisition Parameter**

|             |          |                       |            |                  |           |
|-------------|----------|-----------------------|------------|------------------|-----------|
| Source Type | ESI      | Ion Polarity          | Positive   | Set Nebulizer    | 0.4 Bar   |
| Focus       | Active   | Set Capillary         | 4000 V     | Set Dry Heater   | 180 °C    |
| Scan Begin  | 50 m/z   | Set End Plate Offset  | -500 V     | Set Dry Gas      | 4.0 l/min |
| Scan End    | 1000 m/z | Set Collision Cell RF | 1200.0 Vpp | Set Divert Valve | Source    |

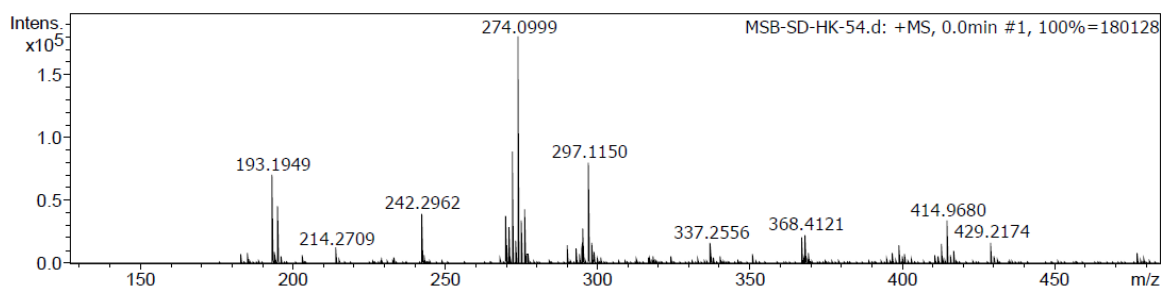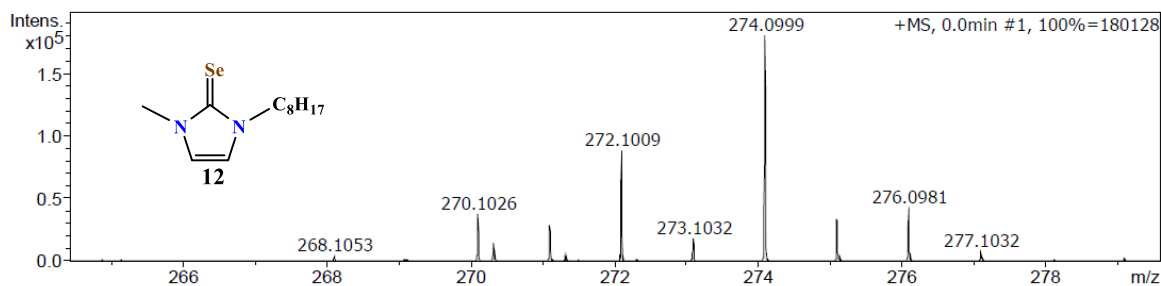

| Meas. m/z | # | Ion Formula | m/z      | err [ppm] | mSigma | # Sigma | Score  | rdb | e <sup>-</sup> Conf | N-Rule |
|-----------|---|-------------|----------|-----------|--------|---------|--------|-----|---------------------|--------|
| 274.0999  | 1 | C12H22N2Se  | 274.0943 | 20.4      | 28.2   | 1       | 100.00 | 3.0 | odd                 | ok     |

**Fig. S36** HRMS spectrum of **12**.

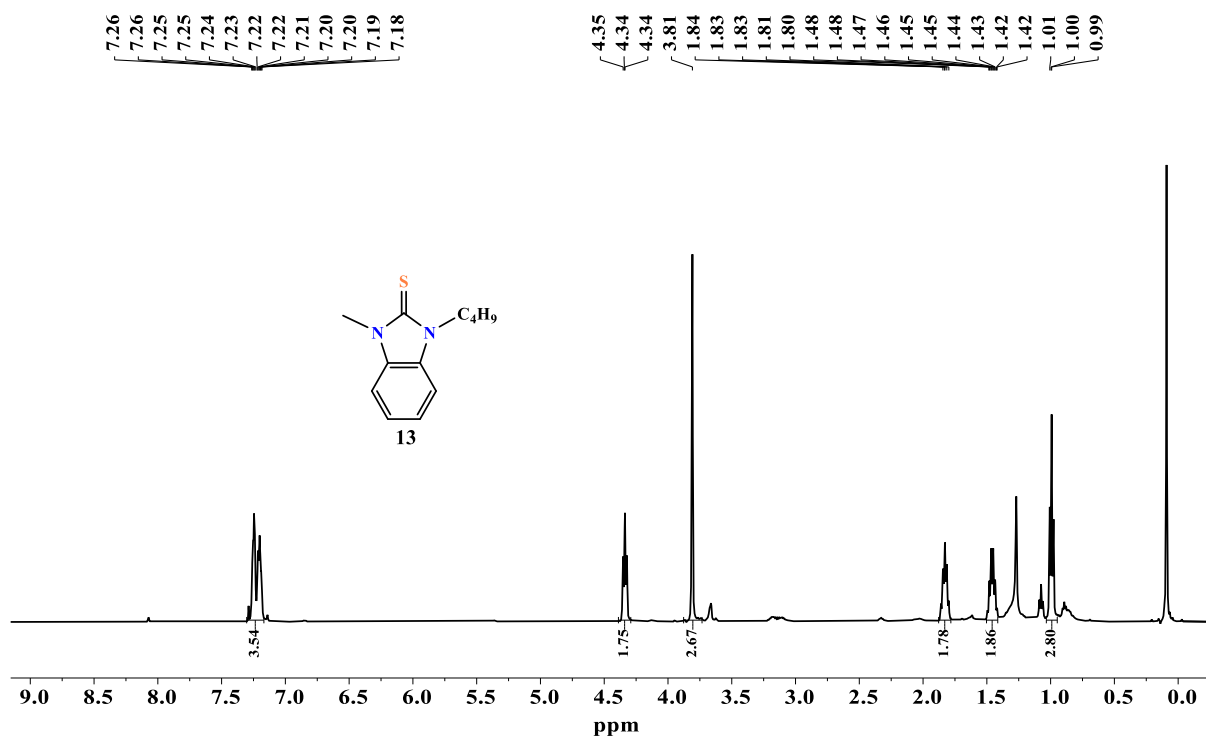

**Fig. S37**  $^1\text{H}$  NMR spectrum of **13**.

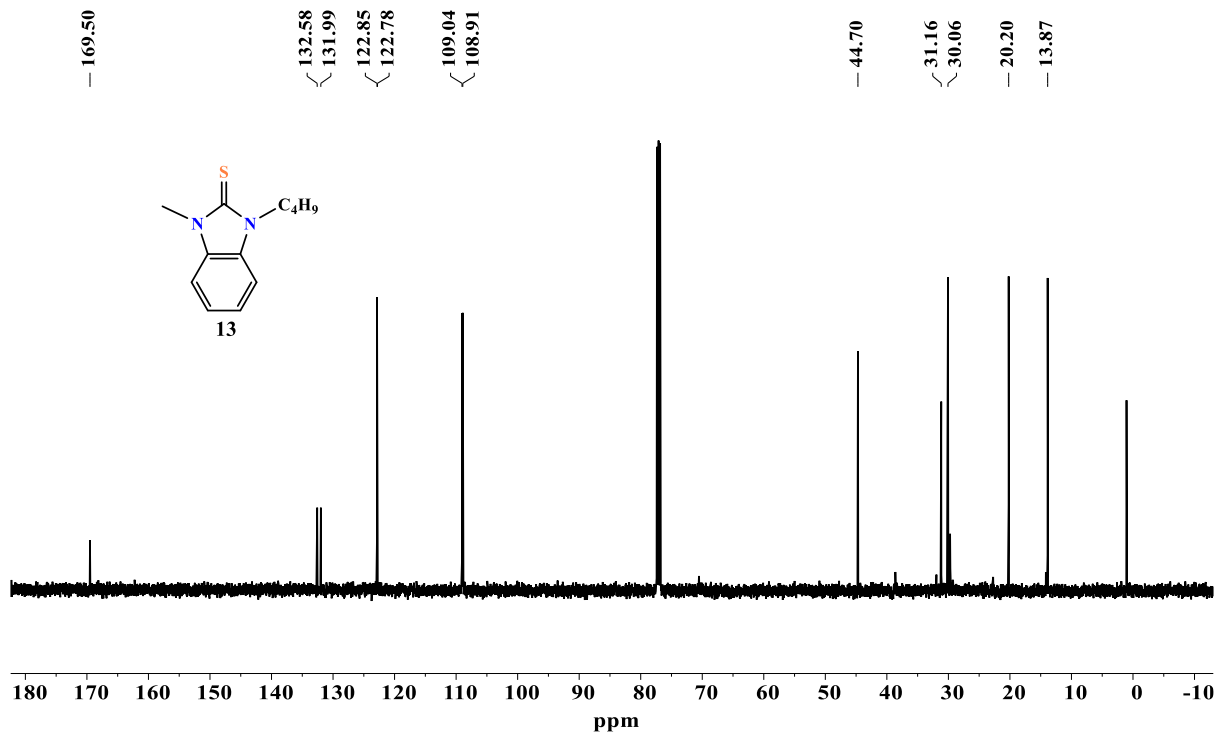

**Fig. S38**  $^{13}\text{C}$  NMR spectrum of **13**.

DEPARTMENT OF CHEMISTRY, I.I.T.(B)

Analysis Info

Analysis Name D:\Data\APR-2022\MSB-SID-HK-92.d  
 Method Low\_mass-NAF.m  
 Sample Name MSB-SID-HK-92  
 Comment C12H16N2S

Acquisition Date 4/5/2022 7:24:25 PM

Operator SJG OUT  
 Instrument maXis impact 282001.00081

Acquisition Parameter

|             |            |                      |          |                  |           |
|-------------|------------|----------------------|----------|------------------|-----------|
| Source Type | ESI        | Ion Polarity         | Positive | Set Nebulizer    | 0.3 Bar   |
| Focus       | Not active | Set Capillary        | 3700 V   | Set Dry Heater   | 180 °C    |
| Scan Begin  | 50 m/z     | Set End Plate Offset | -500 V   | Set Dry Gas      | 4.0 l/min |
| Scan End    | 600 m/z    | Set Charging Voltage | 2000 V   | Set Divert Valve | Source    |
|             |            | Set Corona           | 0 nA     | Set APCI Heater  | 0 °C      |

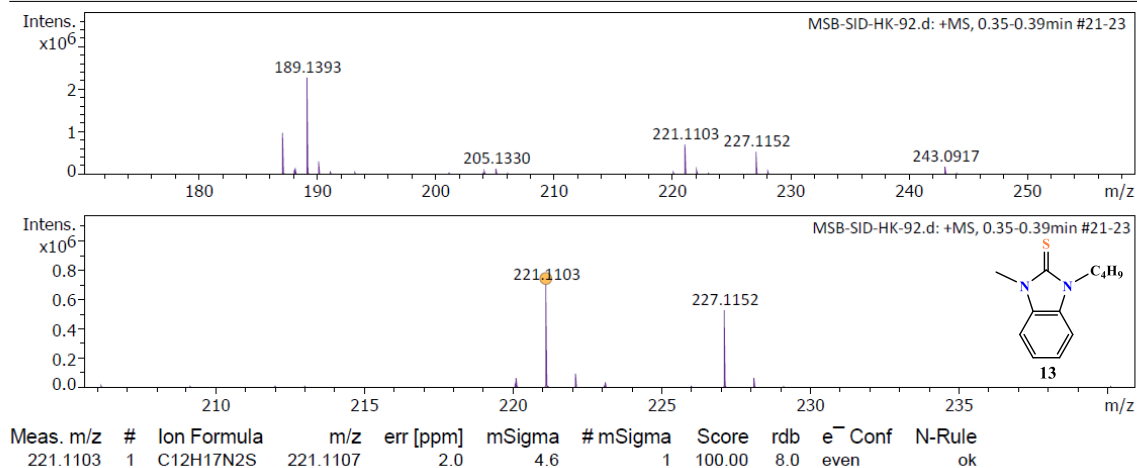

Fig. S39 HRMS spectrum of 13.

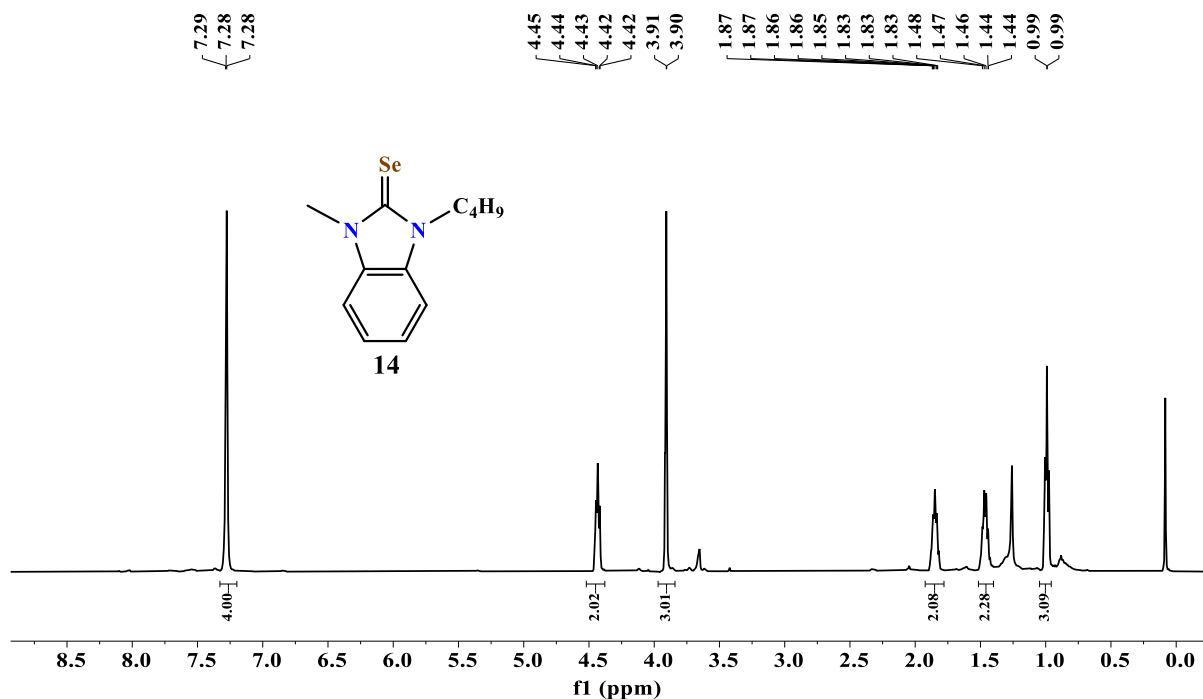

Fig. S40 <sup>1</sup>H NMR spectrum of 14.

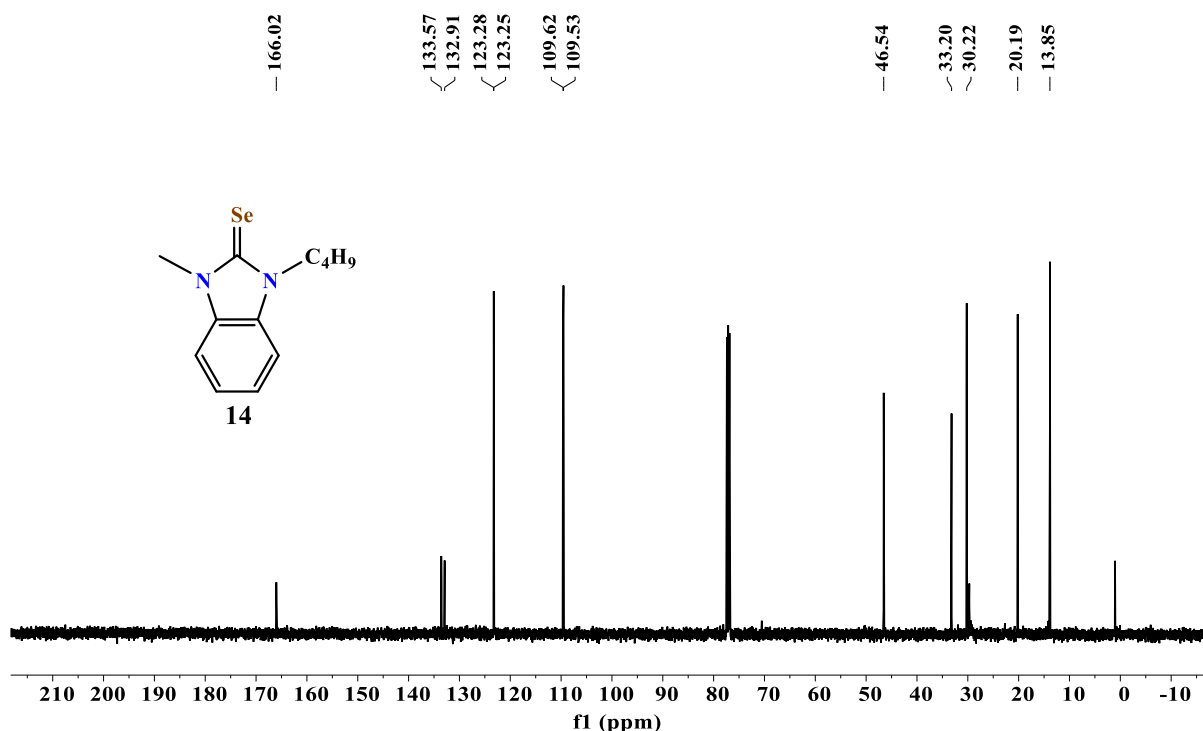

Fig. S41 <sup>13</sup>C NMR spectrum of 14.

DEPARTMENT OF CHEMISTRY, I.I.T.(B)

Analysis Info

Analysis Name D:\Data\APR-2022\MSB-SID-HK-93-C.d  
 Method Low\_mass- NaICsI.m  
 Sample Name MSB-SID-HK-93-C  
 Comment C12H16N2Se1

Acquisition Date 4/5/2022 7:11:30 PM

Operator SJG OUT  
 Instrument maXis impact 282001.00081

Acquisition Parameter

|             |            |                      |          |                  |           |
|-------------|------------|----------------------|----------|------------------|-----------|
| Source Type | ESI        | Ion Polarity         | Positive | Set Nebulizer    | 0.3 Bar   |
| Focus       | Not active | Set Capillary        | 4000 V   | Set Dry Heater   | 180 °C    |
| Scan Begin  | 50 m/z     | Set End Plate Offset | -500 V   | Set Dry Gas      | 4.0 l/min |
| Scan End    | 650 m/z    | Set Charging Voltage | 2000 V   | Set Divert Valve | Source    |
|             |            | Set Corona           | 0 nA     | Set APCI Heater  | 0 °C      |

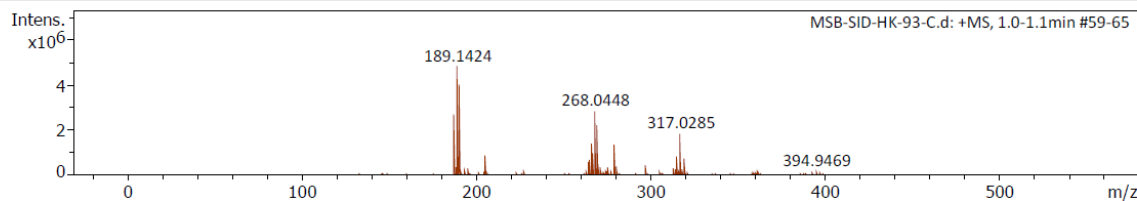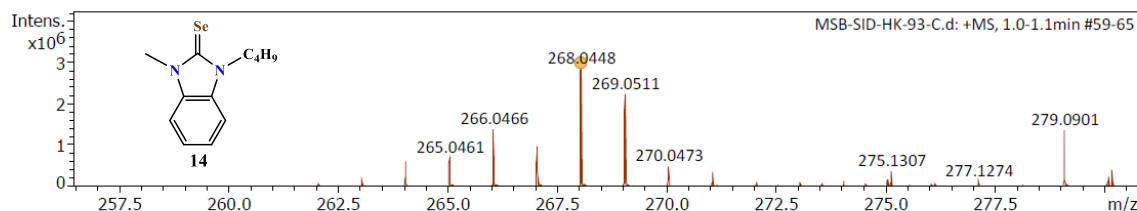

| Meas. m/z | # | Ion Formula | m/z      | err [ppm] | mSigma | # mSigma | Score  | rdb | e <sup>-</sup> Conf | N-Rule |
|-----------|---|-------------|----------|-----------|--------|----------|--------|-----|---------------------|--------|
| 268.0448  | 1 | C11H16N2OSe | 272.0422 | 0.5       | 515.5  | 1        | 100.00 | 7.5 | odd                 | ok     |

Fig. S42 HRMS spectrum of 14.

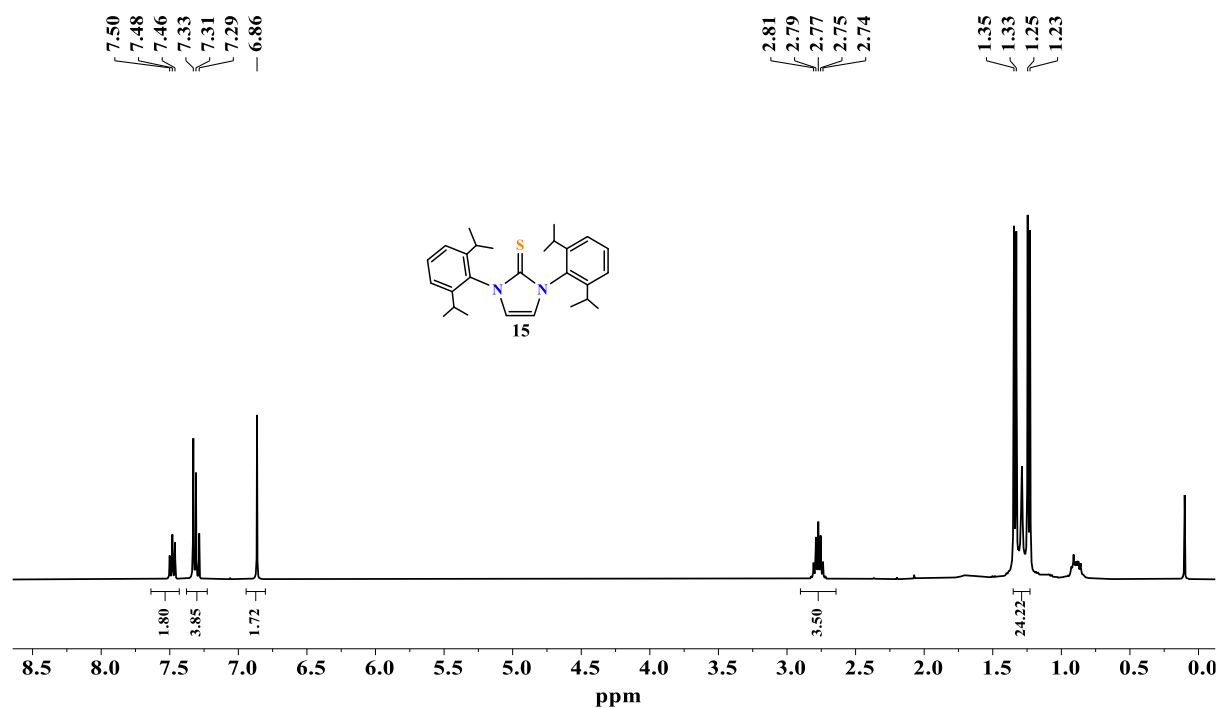

Fig. S43 <sup>1</sup>H NMR spectrum of 15.

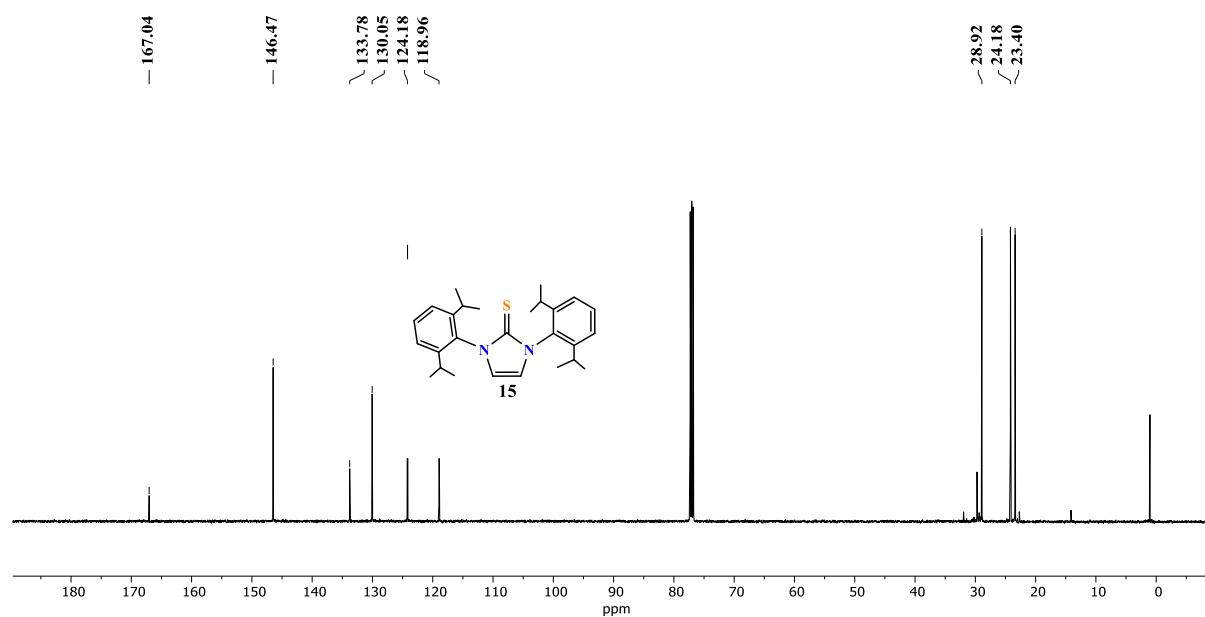

Fig. S44 <sup>13</sup>C NMR spectrum of 15.

DEPARTMENT OF CHEMISTRY, I.I.T.(B)

Analysis Info

Analysis Name D:\Data\AUG 2021\MSB-SID-HK-109.d  
 Method Low\_mass- NAF.m  
 Sample Name MSB-SID-HK-109  
 Comment C27H36N2S

Acquisition Date 8/12/2021 1:20:05 AM

Operator MSB-OUT  
 Instrument maXis impact 282001.00081

Acquisition Parameter

|             |         |                      |          |                  |           |
|-------------|---------|----------------------|----------|------------------|-----------|
| Source Type | ESI     | Ion Polarity         | Positive | Set Nebulizer    | 0.3 Bar   |
| Focus       | Active  | Set Capillary        | 3200 V   | Set Dry Heater   | 180 °C    |
| Scan Begin  | 50 m/z  | Set End Plate Offset | -500 V   | Set Dry Gas      | 4.0 l/min |
| Scan End    | 600 m/z | Set Charging Voltage | 2000 V   | Set Divert Valve | Source    |
|             |         | Set Corona           | 0 nA     | Set APCI Heater  | 0 °C      |

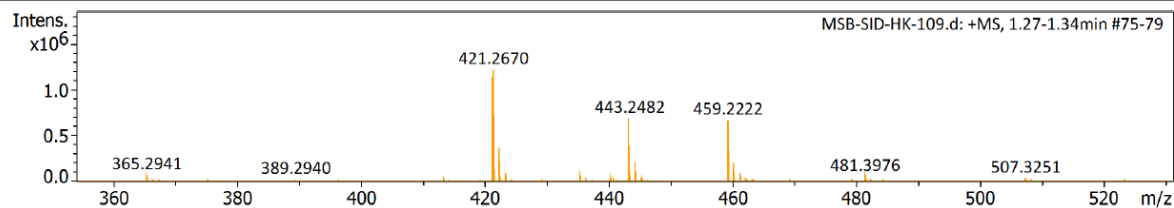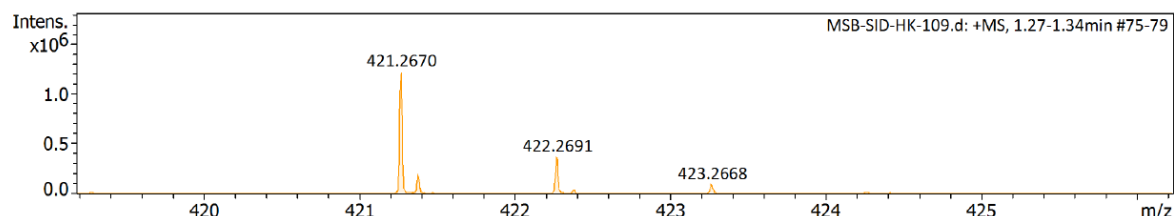

| Meas. m/z | # | Ion Formula | m/z      | err [ppm] | mSigma | # mSigma | Score  | rdb  | e <sup>-</sup> Conf | N-Rule |
|-----------|---|-------------|----------|-----------|--------|----------|--------|------|---------------------|--------|
| 421.2670  | 1 | C27H37N2S   | 421.2672 | 0.5       | 11.4   | 1        | 100.00 | 13.0 | even                | ok     |

Fig. S45 HRMS spectrum of 15.

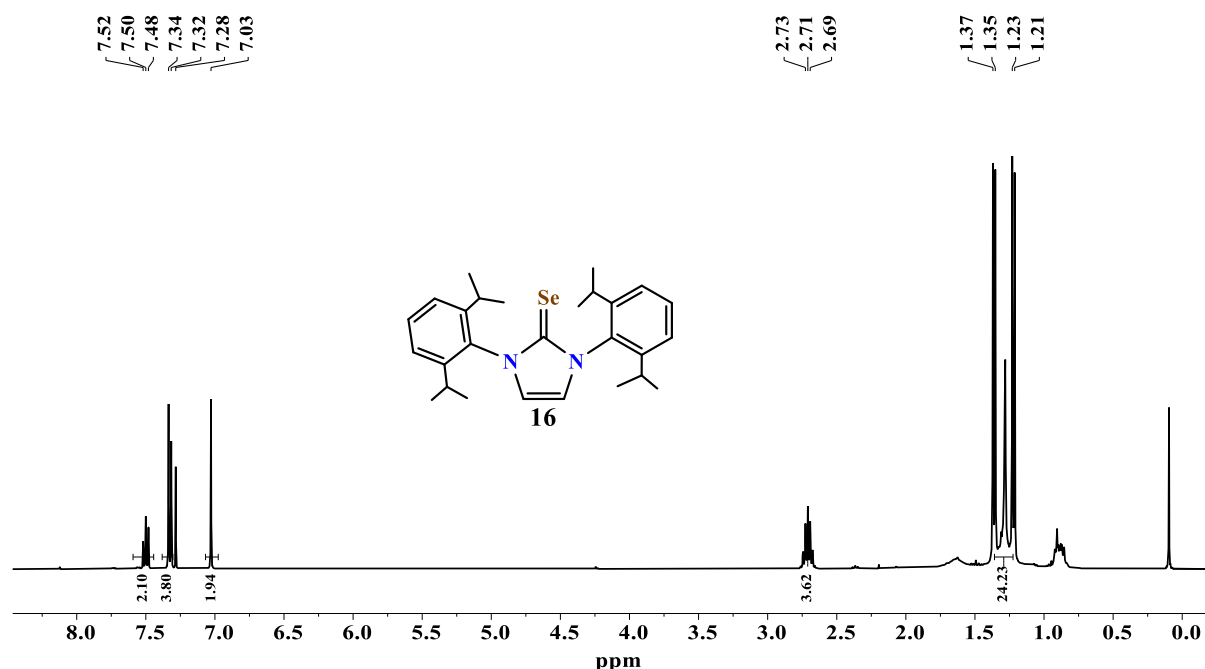

Fig. S46 <sup>1</sup>H NMR spectrum of 16.



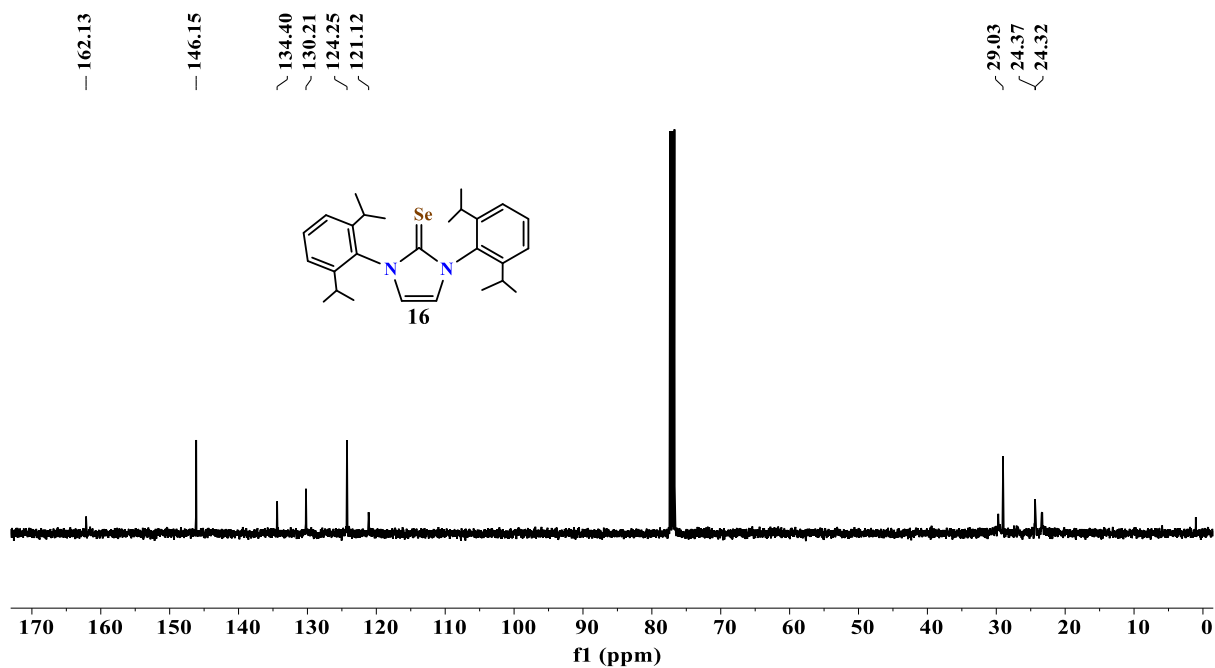

Fig. S47  $^{13}\text{C}$  NMR spectrum of 16.

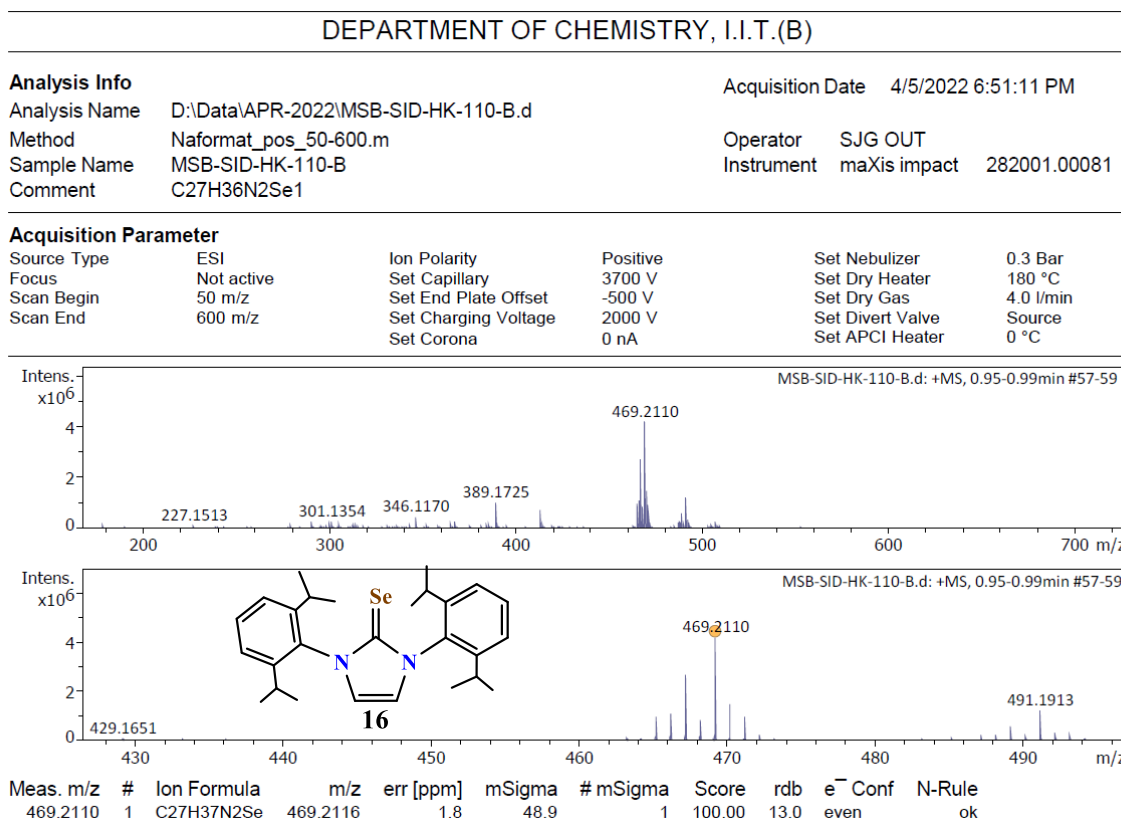

Fig. S48 HRMS spectrum of 16.

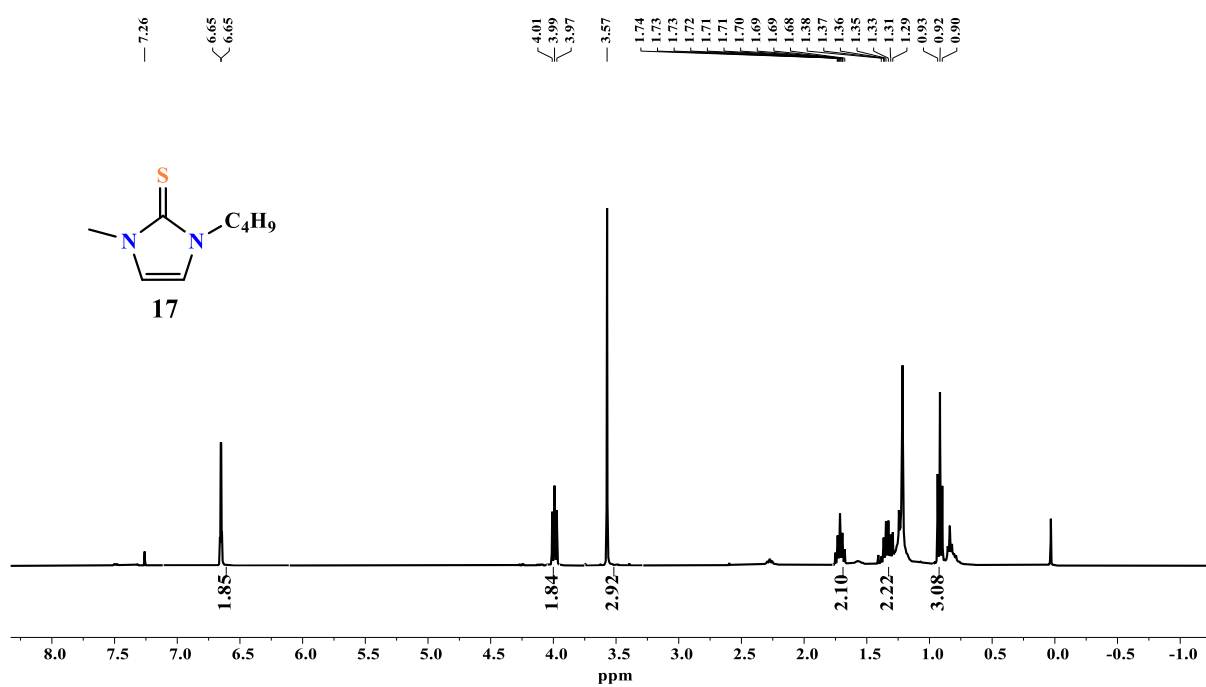

Fig. S49 <sup>1</sup>H NMR spectrum of 17.

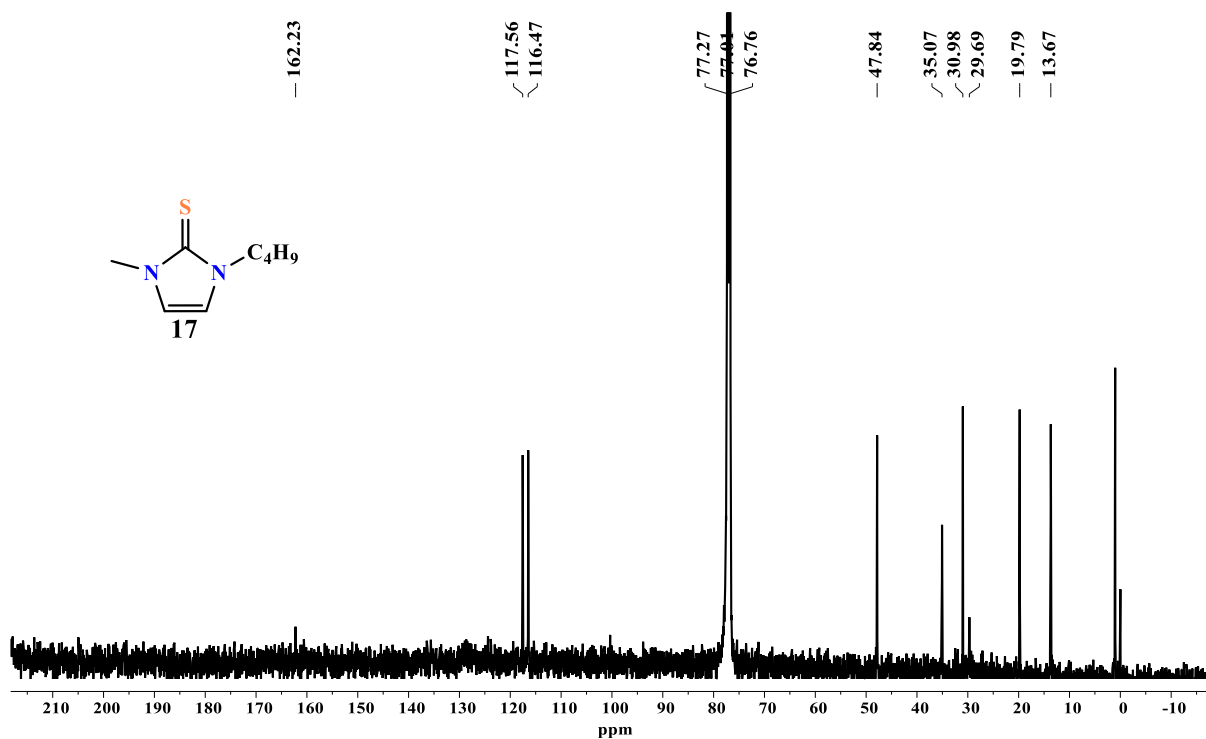

Fig. S50 <sup>13</sup>C NMR spectrum of 17.

DEPARTMENT OF CHEMISTRY, I.I.T.(B)

**Analysis Info**

Analysis Name D:\Data\DEC-2019\MSB-SD-HK-9-5.d  
 Method Tune\_pos\_500\_NAF.m  
 Sample Name MSB-SD-HK-9-5  
 Comment C8H14N2S1

Acquisition Date 12/10/2019 11:24:24 PM  
 Operator PG SRD OUT  
 Instrument maXis impact 282001.00081

**Acquisition Parameter**

|             |         |                       |           |                  |           |
|-------------|---------|-----------------------|-----------|------------------|-----------|
| Source Type | ESI     | Ion Polarity          | Positive  | Set Nebulizer    | 0.3 Bar   |
| Focus       | Active  | Set Capillary         | 4500 V    | Set Dry Heater   | 180 °C    |
| Scan Begin  | 50 m/z  | Set End Plate Offset  | -500 V    | Set Dry Gas      | 4.0 l/min |
| Scan End    | 500 m/z | Set Collision Cell RF | 800.0 Vpp | Set Divert Valve | Source    |

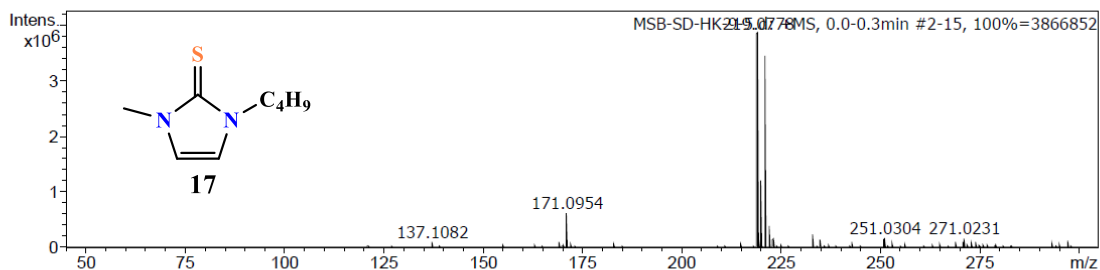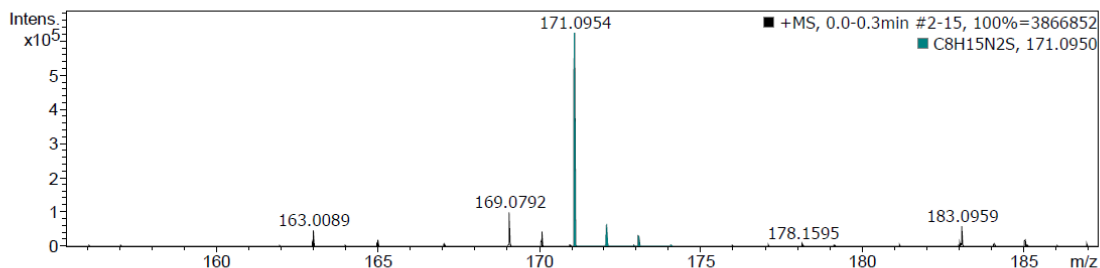

| Meas. m/z | # | Ion Formula | m/z      | err [ppm] | mSigma | # Sigma | Score  | rdb | e <sup>-</sup> Conf | N-Rule |
|-----------|---|-------------|----------|-----------|--------|---------|--------|-----|---------------------|--------|
| 171.0954  | 1 | C8H15N2S    | 171.0950 | -2.3      | 2.4    | 1       | 100.00 | 2.5 | even                | ok     |

**Fig. S51** HRMS spectrum of **17**.

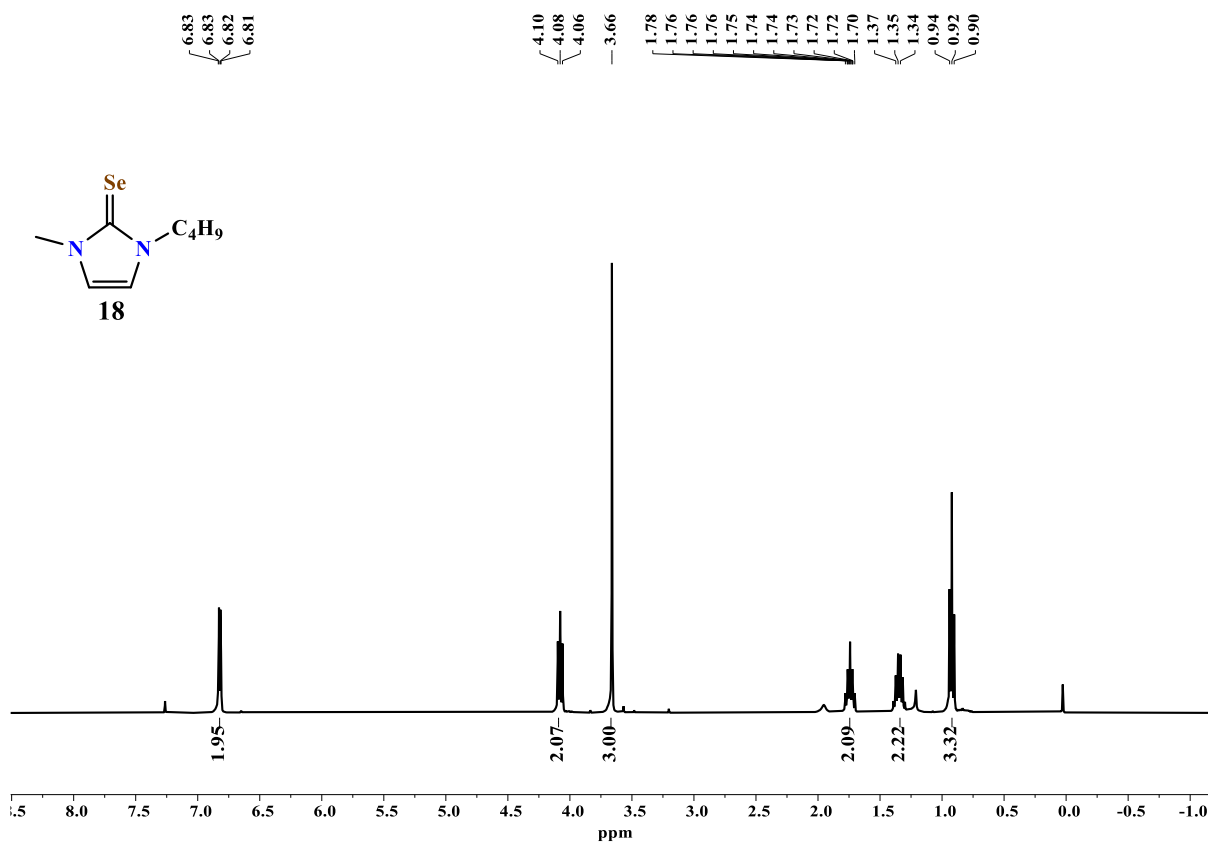

Fig. S52 <sup>1</sup>H NMR spectrum of **18**.

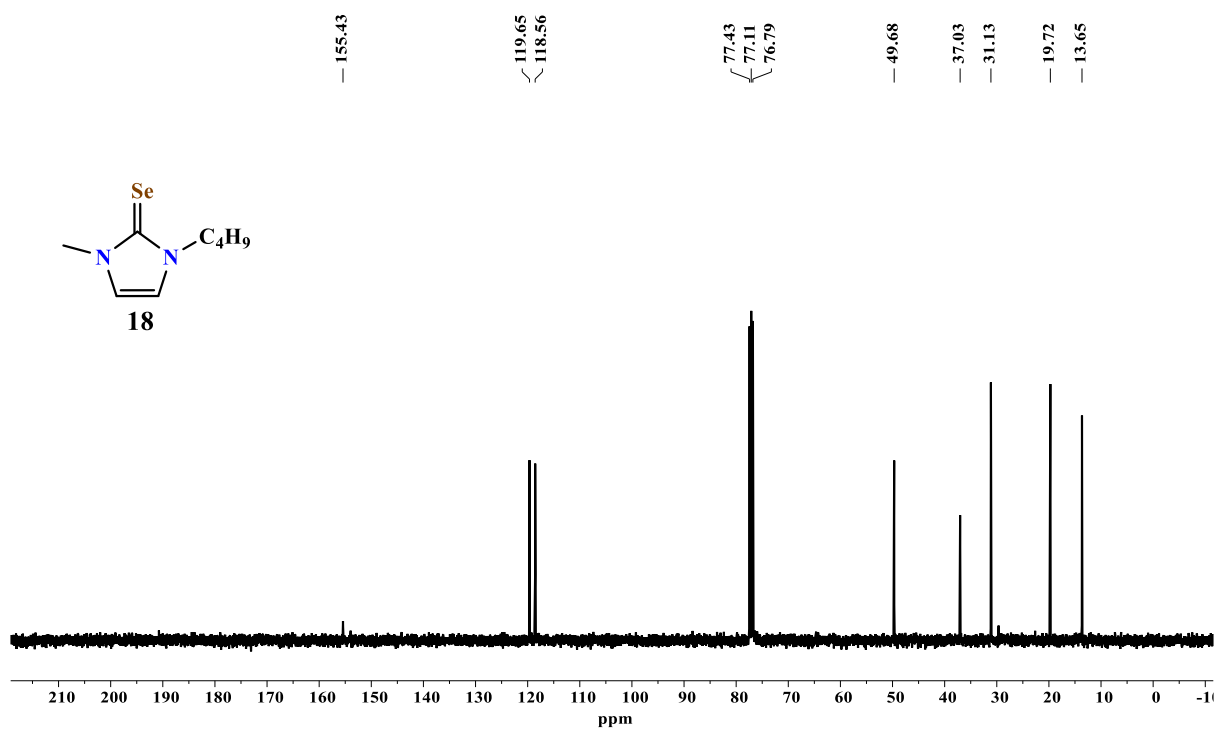

Fig. S53 <sup>13</sup>C NMR spectrum of **18**.

DEPARTMENT OF CHEMISTRY, I.I.T.(B)

**Analysis Info**

Analysis Name D:\Data\DEC-2019\MSB-SD-9-6.d  
 Method Tune\_pos\_500\_NAF.m  
 Sample Name MSB-SD-9-6  
 Comment C8H12N2Se

Acquisition Date 12/10/2019 11:06:22 PM

Operator PG SRD OUT  
 Instrument maXis impact 282001.00081

**Acquisition Parameter**

|             |         |                       |           |                  |           |
|-------------|---------|-----------------------|-----------|------------------|-----------|
| Source Type | ESI     | Ion Polarity          | Positive  | Set Nebulizer    | 0.3 Bar   |
| Focus       | Active  | Set Capillary         | 4500 V    | Set Dry Heater   | 180 °C    |
| Scan Begin  | 50 m/z  | Set End Plate Offset  | -500 V    | Set Dry Gas      | 4.0 l/min |
| Scan End    | 500 m/z | Set Collision Cell RF | 800.0 Vpp | Set Divert Valve | Source    |

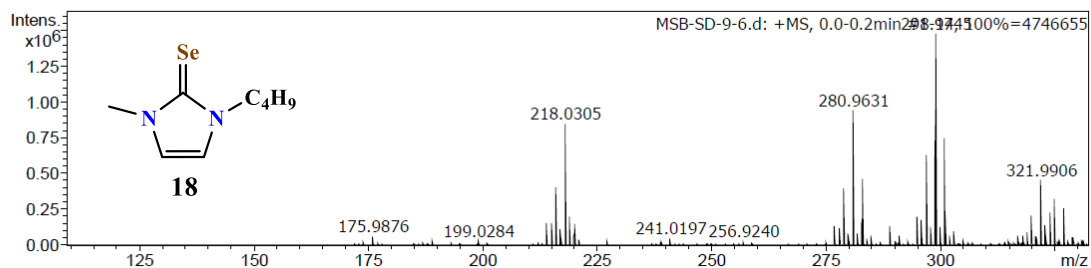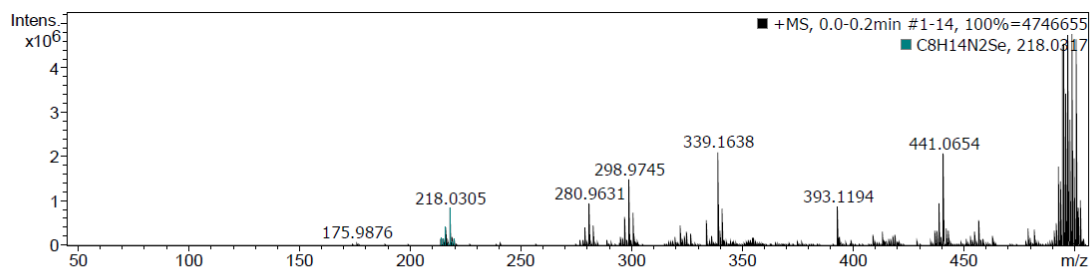

| Meas. m/z | # | Ion Formula | m/z      | err [ppm] | mSigma | # Sigma | Score  | rdb | e <sup>-</sup> Conf | N-Rule |
|-----------|---|-------------|----------|-----------|--------|---------|--------|-----|---------------------|--------|
| 218.0305  | 1 | C8H14N2Se   | 218.0317 | 5.4       | 56.0   | 1       | 100.00 | 3.0 | odd                 | ok     |

**Fig. S54** HRMS spectrum of **18**.

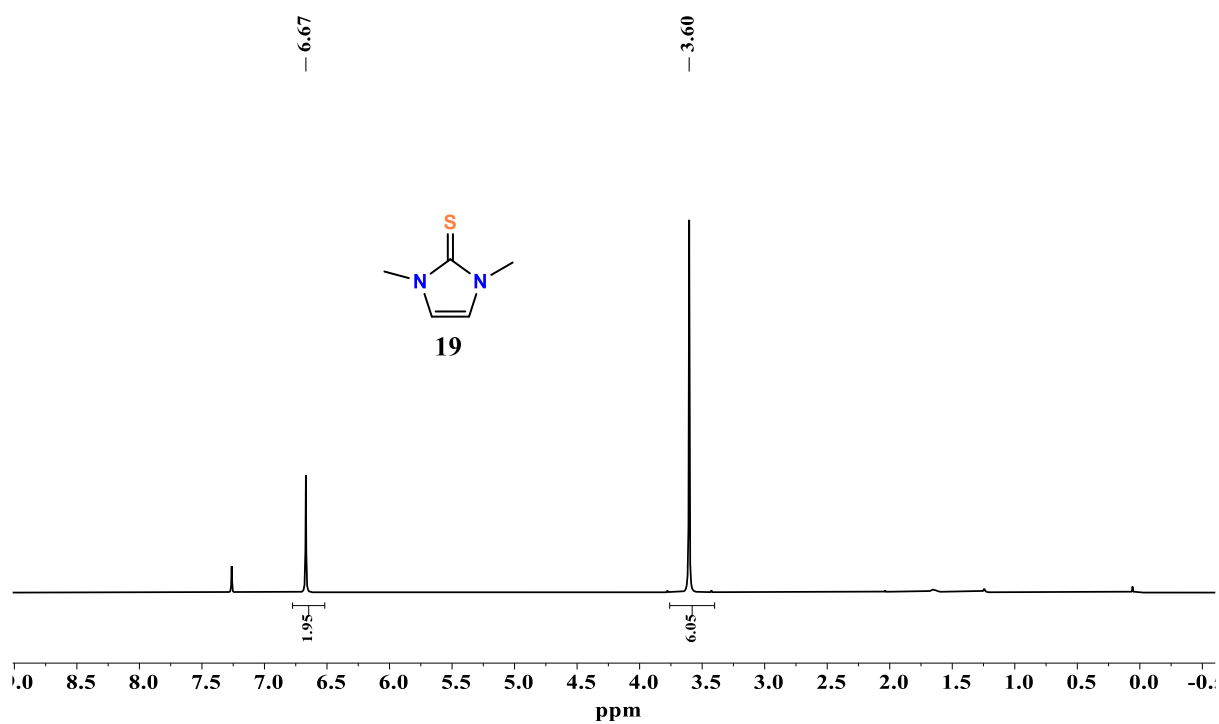

Fig. S55  $^1\text{H}$  NMR spectrum of 19.

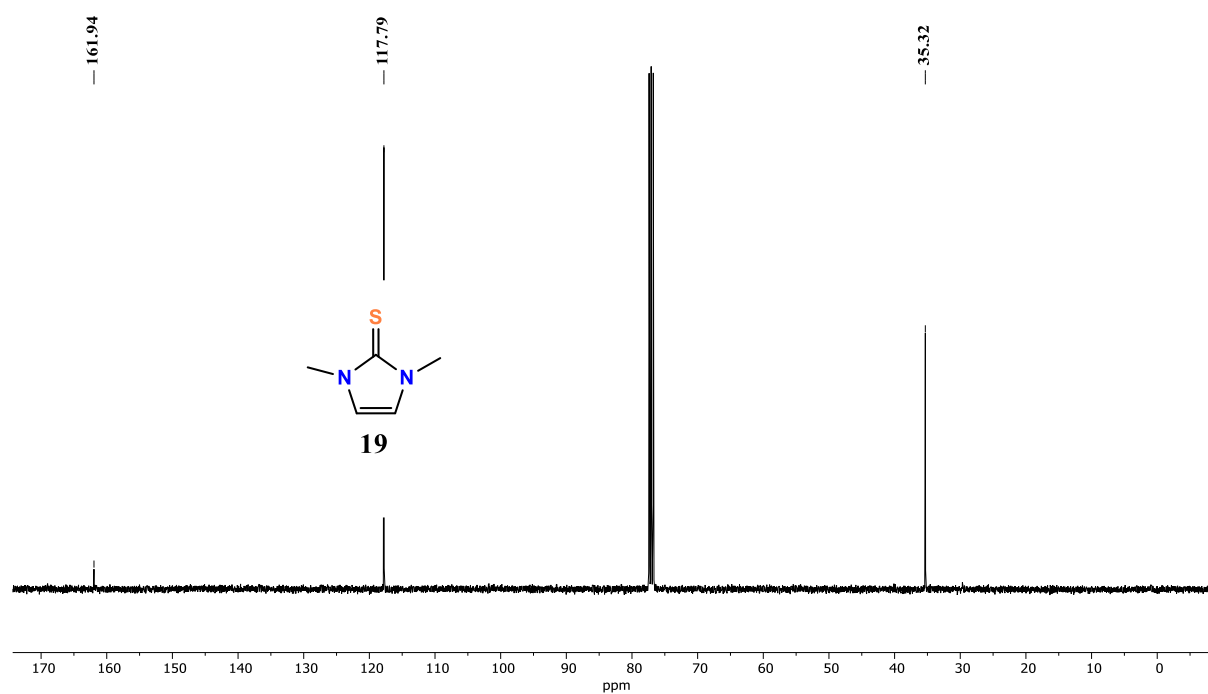

Fig. S56  $^{13}\text{C}$  NMR spectrum of 19.

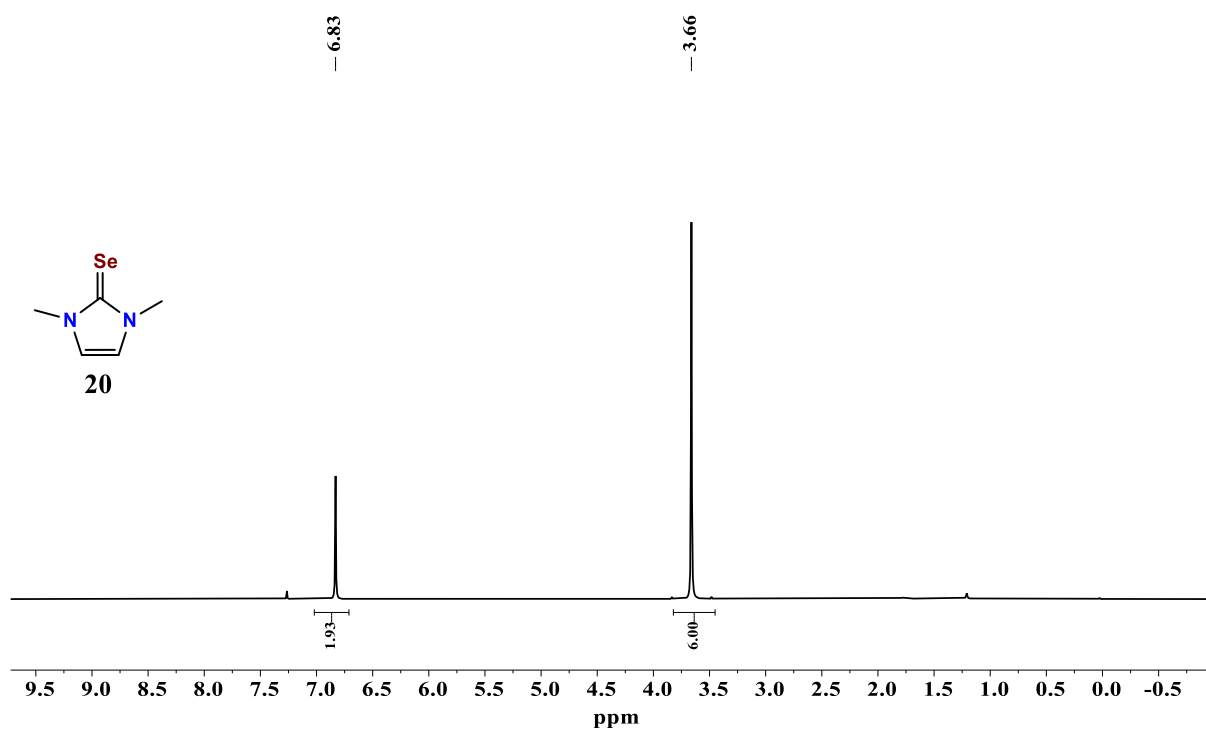

**Fig. S57** <sup>1</sup>H NMR spectrum of **20**.

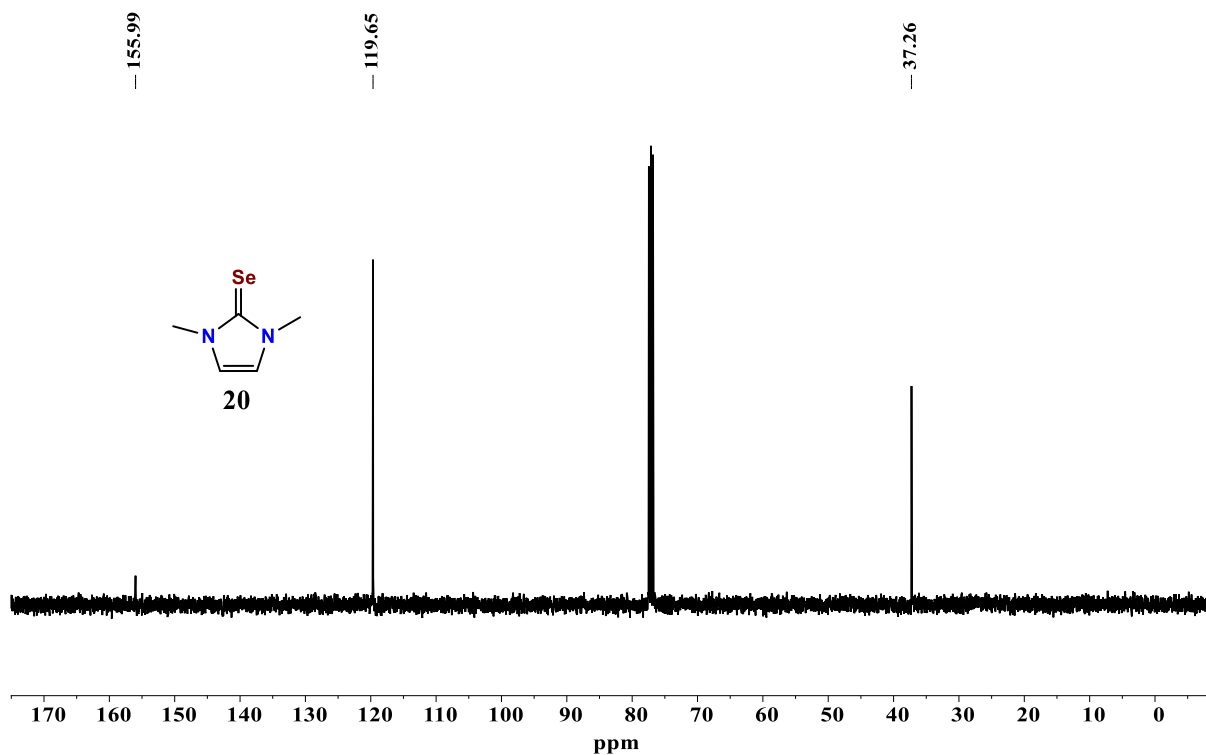

**Fig. S58:** <sup>13</sup>C NMR spectrum of **20**.

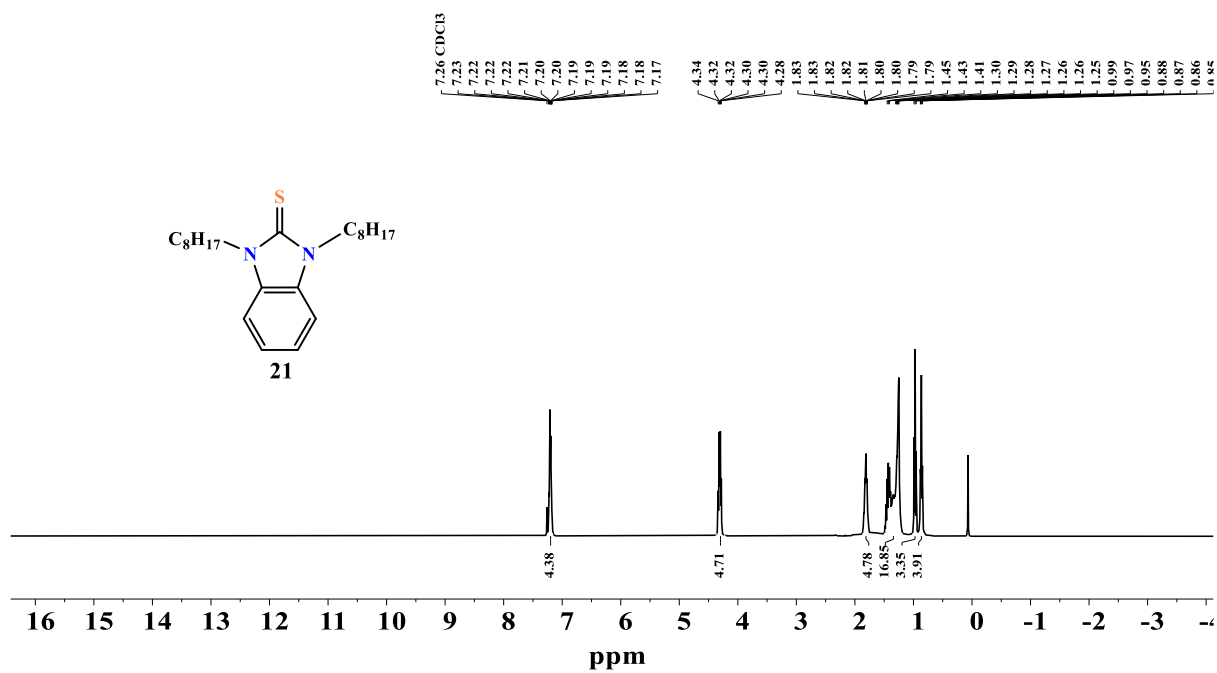

Fig. S59  $^1\text{H}$  NMR spectrum of **21**.

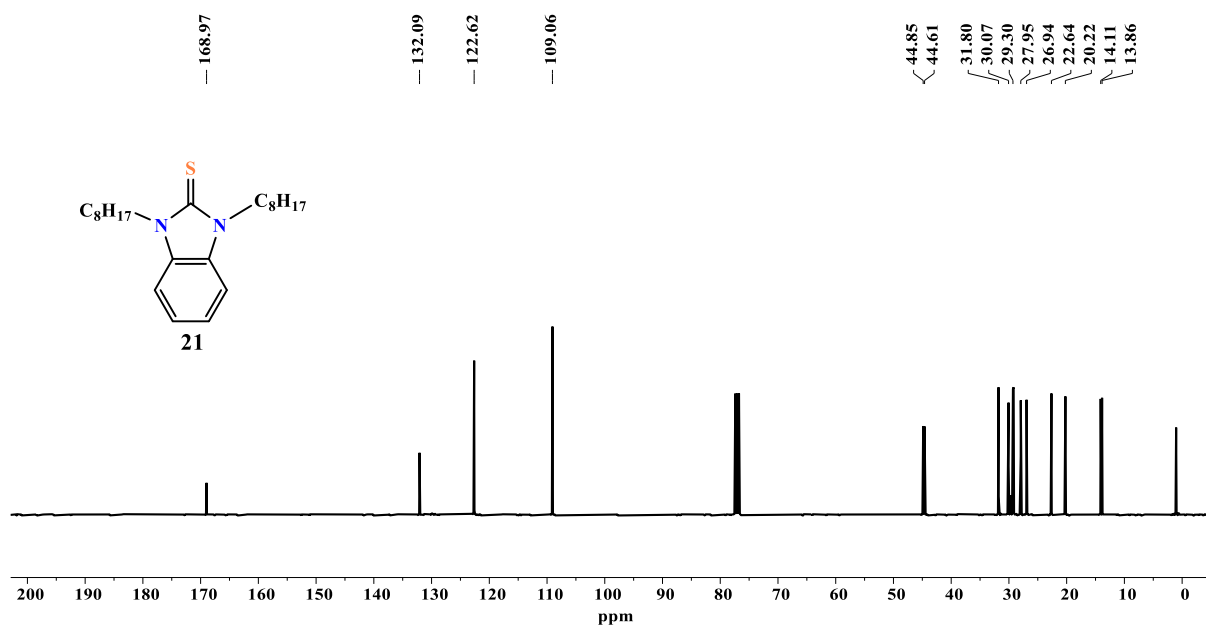

Fig. S60  $^{13}\text{C}$  NMR spectrum of **21**.



DEPARTMENT OF CHEMISTRY, I.I.T.(B)

Analysis Info

Analysis Name D:\Data\FEB-2022\MSB-SID-HK-122.d  
 Method Low\_mass- NaICsI.m  
 Sample Name MSB-SID-HK-122  
 Comment C23H38N2S

Acquisition Date 2/4/2022 7:48:26 PM

Operator SJGOUT  
 Instrument maXis impact 282001.00081

Acquisition Parameter

|             |            |                      |          |                  |           |
|-------------|------------|----------------------|----------|------------------|-----------|
| Source Type | ESI        | Ion Polarity         | Positive | Set Nebulizer    | 0.3 Bar   |
| Focus       | Not active | Set Capillary        | 4000 V   | Set Dry Heater   | 180 °C    |
| Scan Begin  | 50 m/z     | Set End Plate Offset | -500 V   | Set Dry Gas      | 4.0 l/min |
| Scan End    | 650 m/z    | Set Charging Voltage | 2000 V   | Set Divert Valve | Source    |
|             |            | Set Corona           | 0 nA     | Set APCI Heater  | 0 °C      |

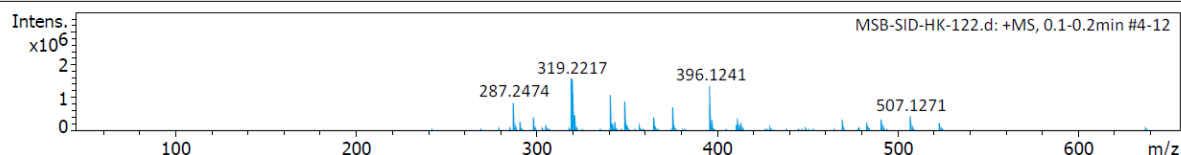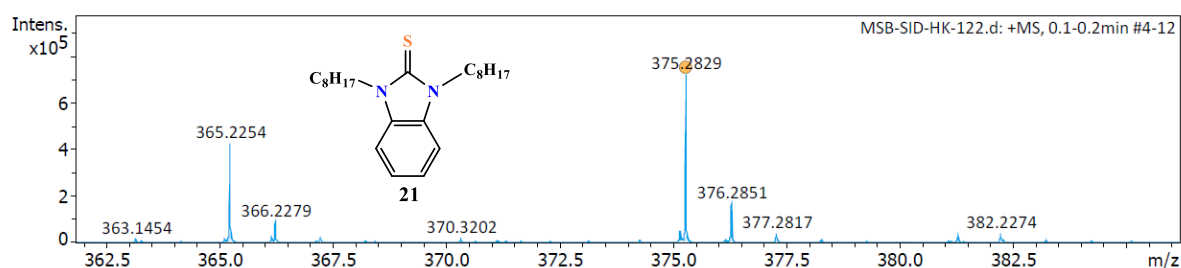

| Meas. m/z | # | Ion Formula | m/z      | err [ppm] | mSigma | # mSigma | Score  | rdb | e <sup>-</sup> Conf | N-Rule |
|-----------|---|-------------|----------|-----------|--------|----------|--------|-----|---------------------|--------|
| 375.2829  | 1 | C23H39N2S   | 375.2828 | -0.0      | 21.7   | 1        | 100.00 | 8.0 | even                | ok     |

Fig. S61 HRMS Spectrum of 21.

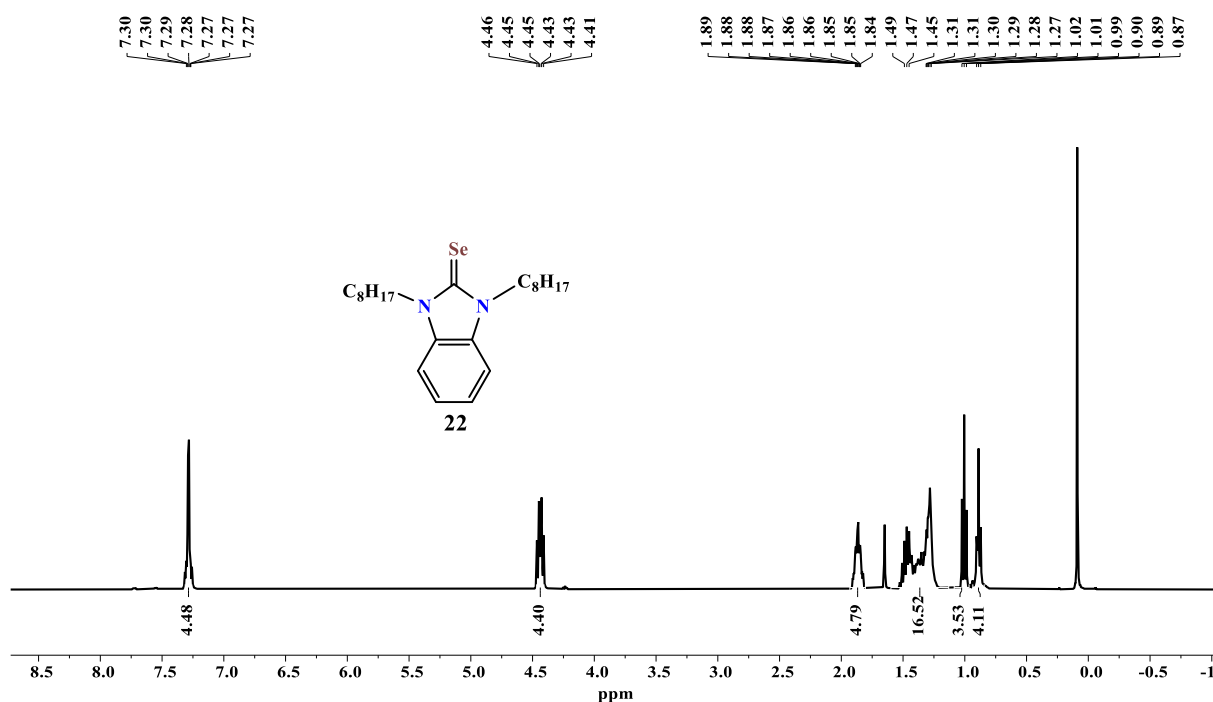

Fig. S62 <sup>1</sup>H NMR spectrum of 22.

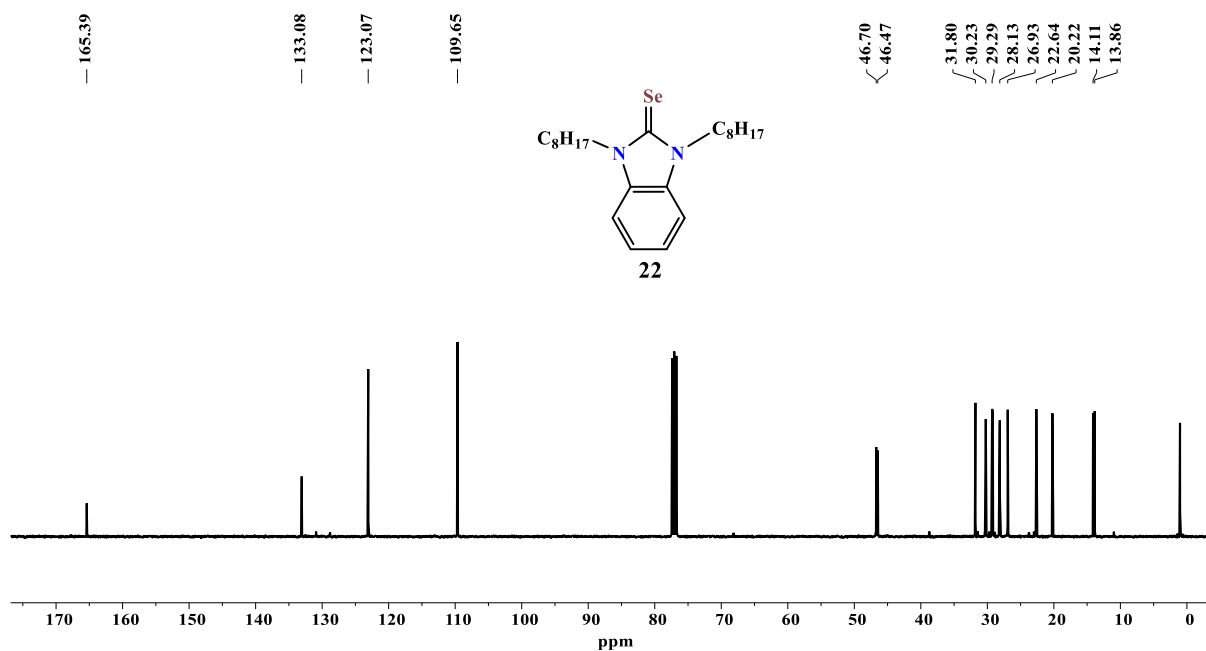

Fig. S63 <sup>13</sup>C NMR spectrum of **22**.

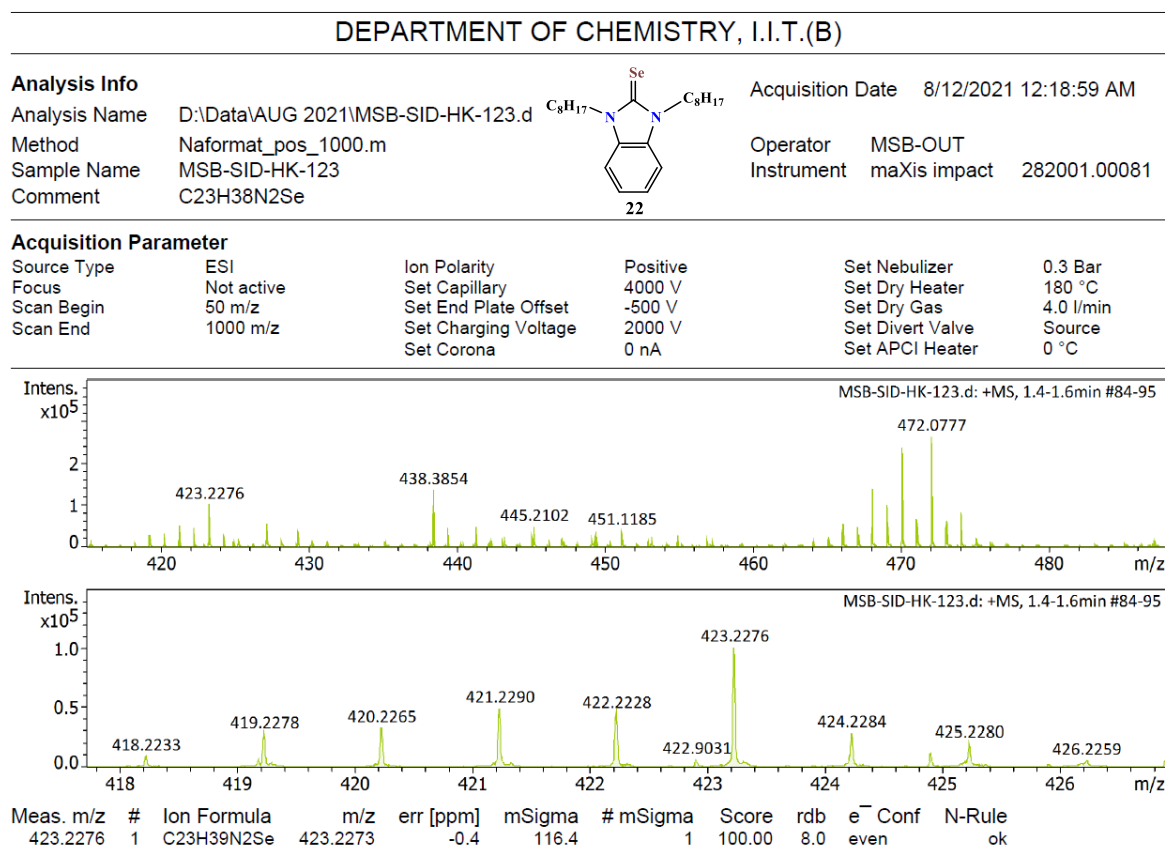

Fig. S64 HRMS spectrum of **22**.

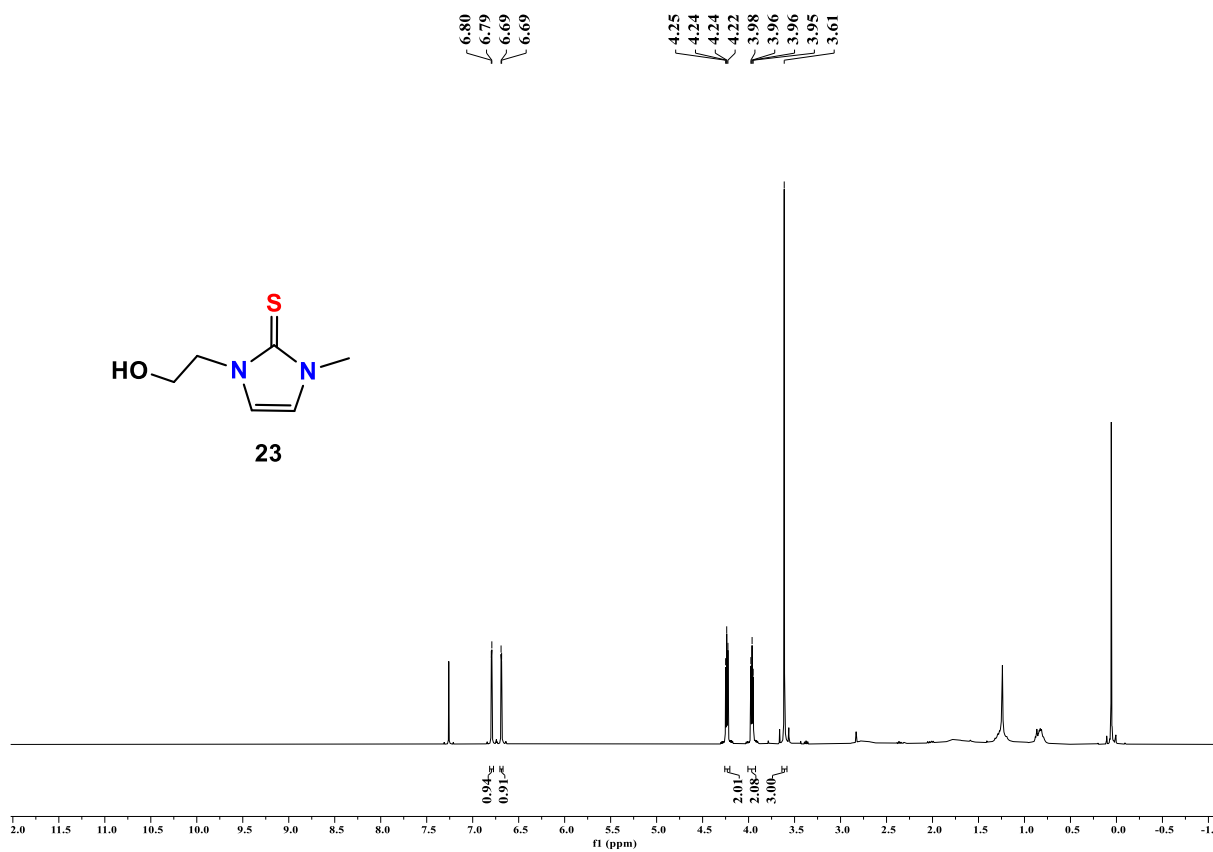

Fig. S65 <sup>1</sup>H NMR spectrum of **23**.

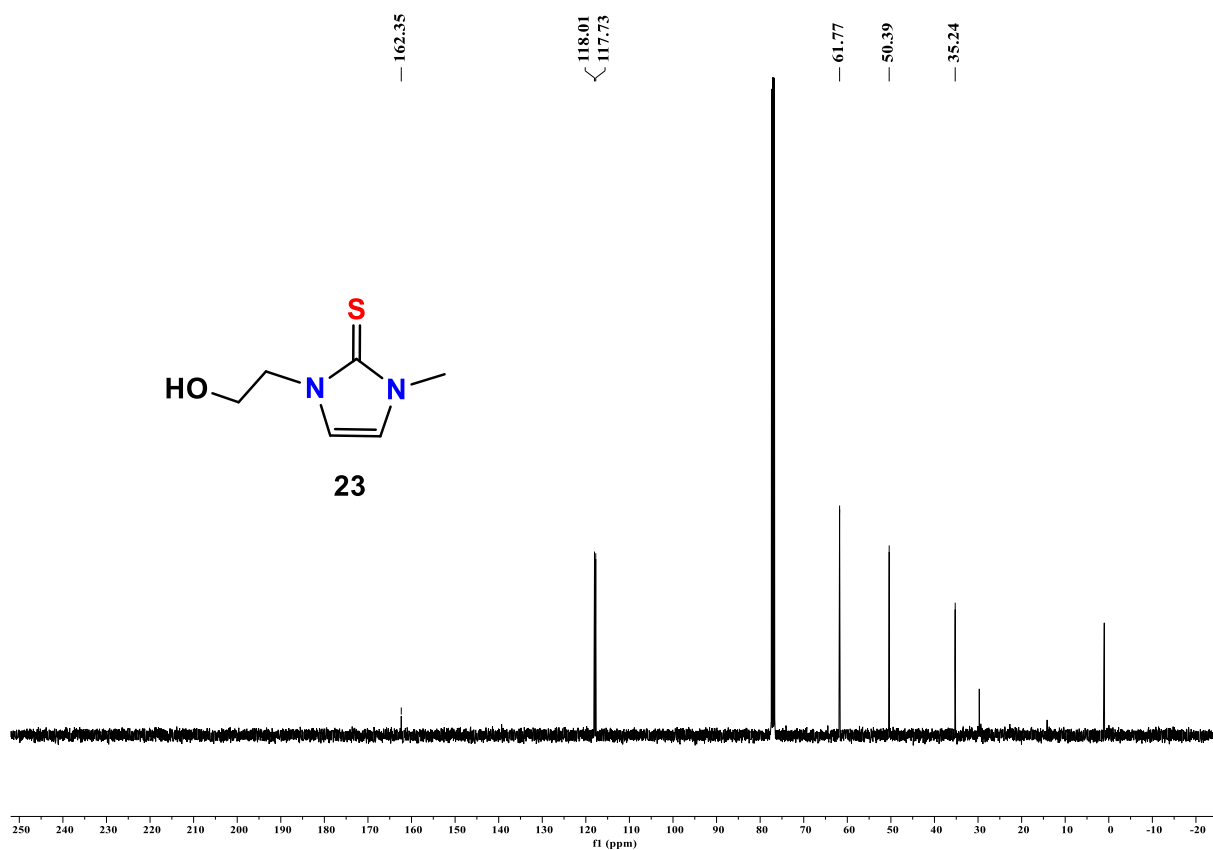

**Fig. S66**  $^{13}\text{C}$  NMR spectrum of **23**.

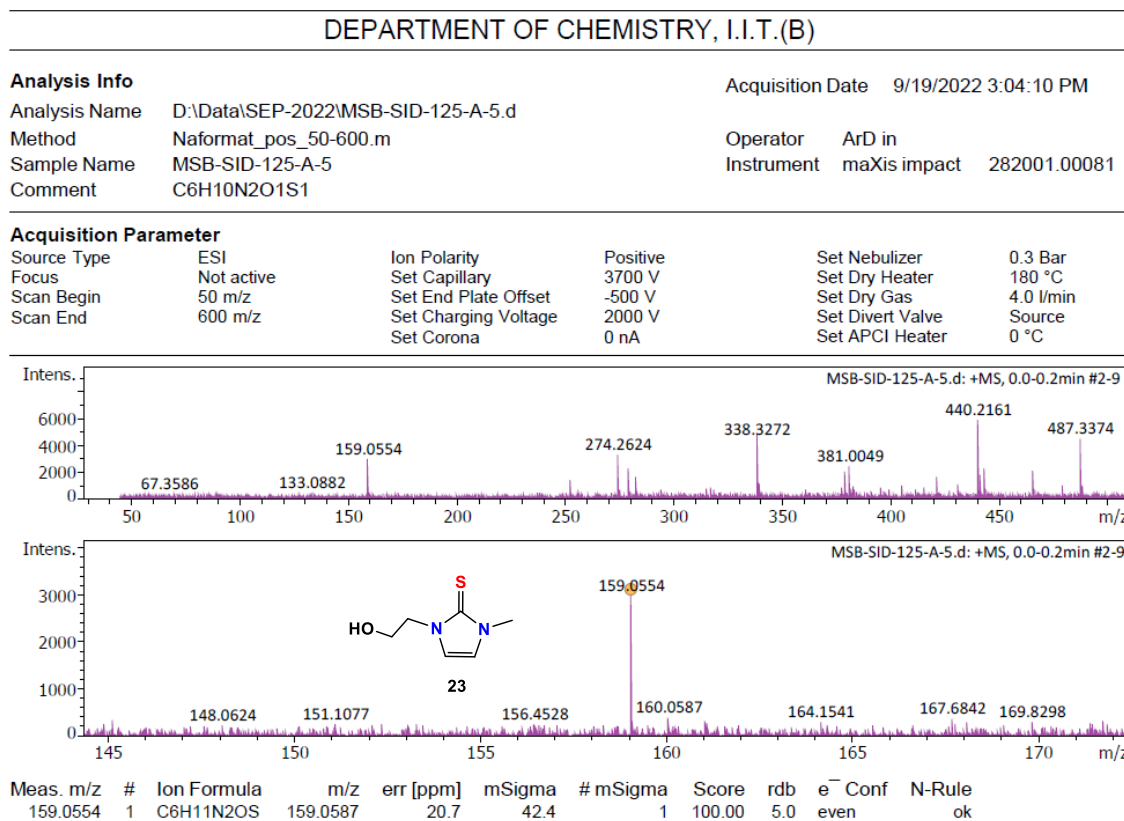

**Fig. S67** HRMS spectrum of **23**.

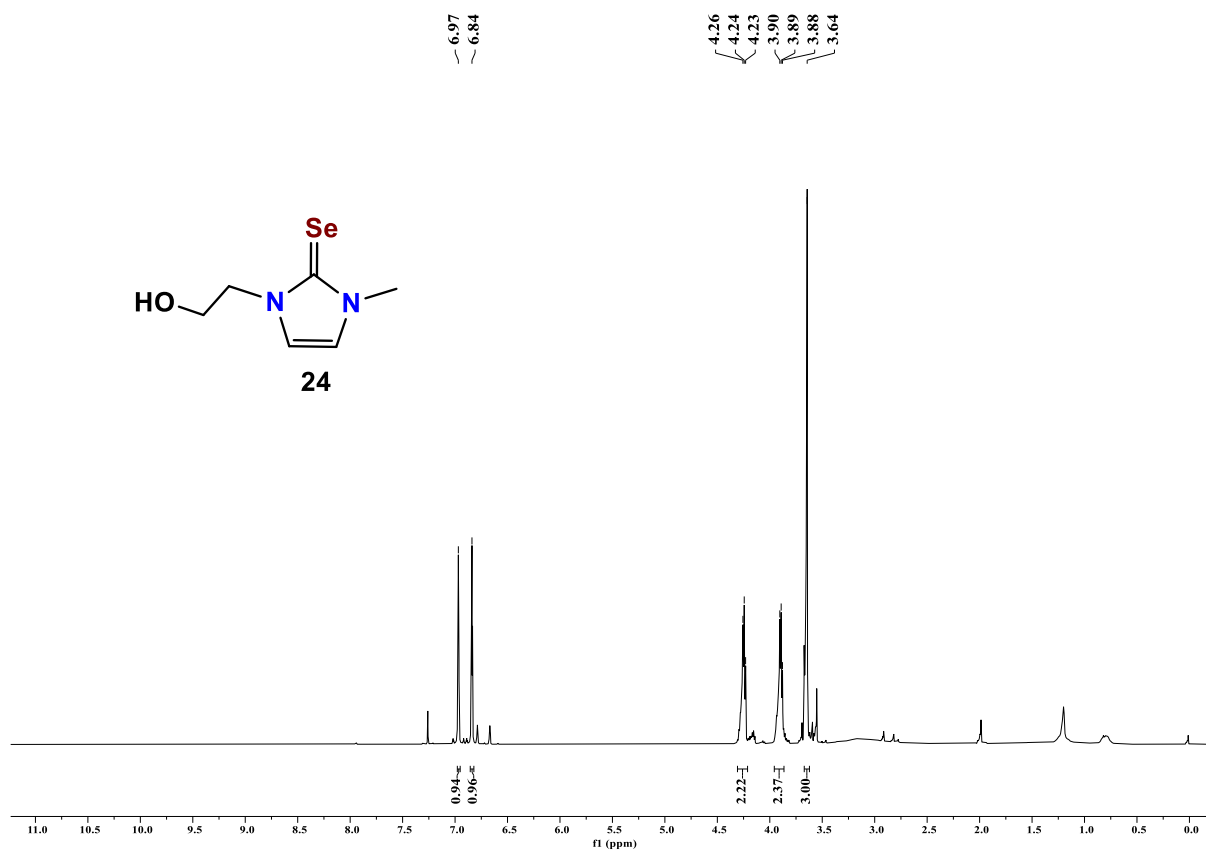

**Fig. S68**  $^1\text{H}$  NMR spectrum of **24**.

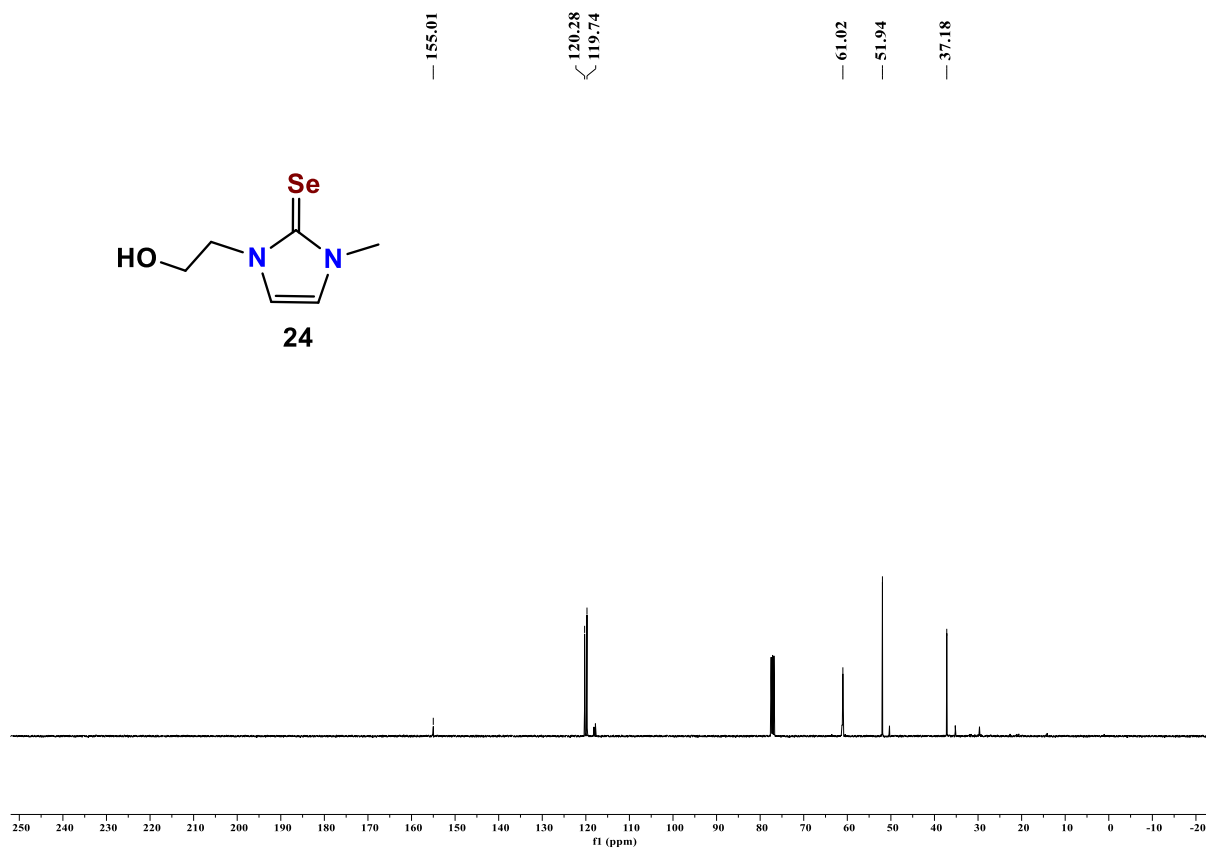

**Fig. S69**  $^{13}\text{C}$  NMR spectrum of **24**.

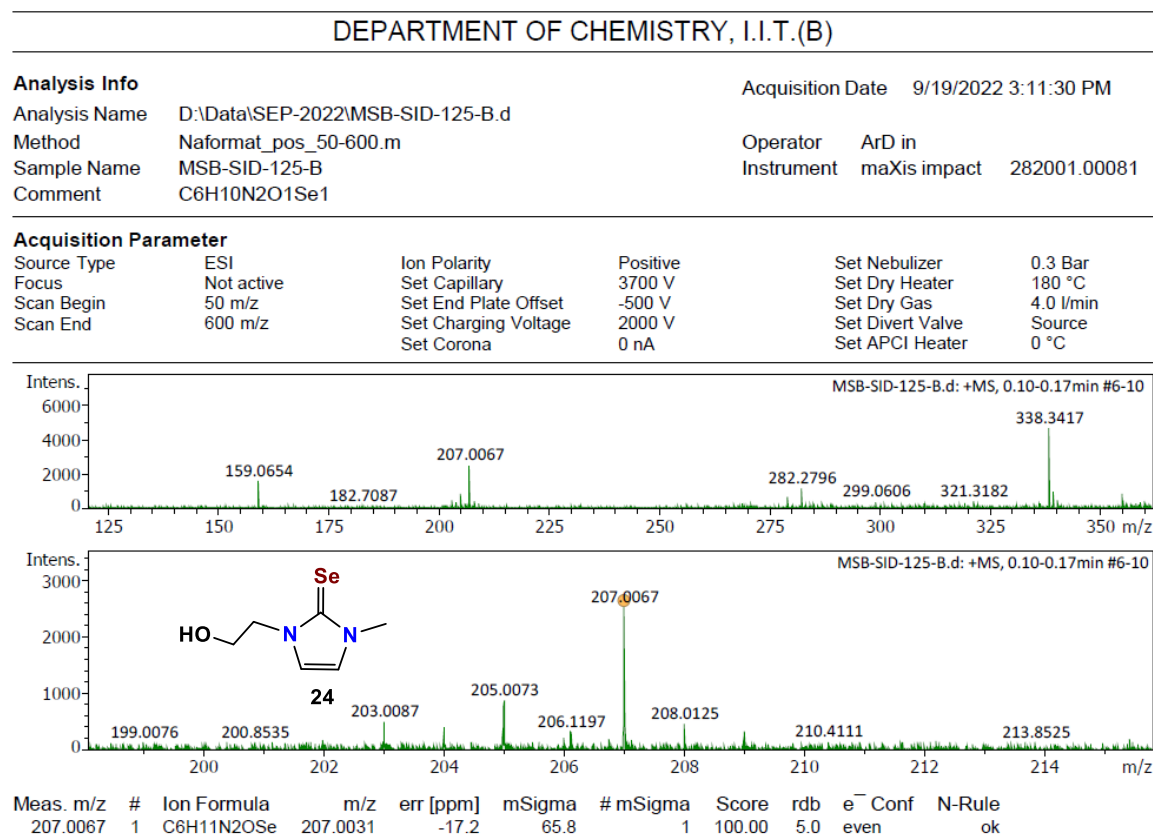

**Fig. S70** HRMS spectrum of **24**.

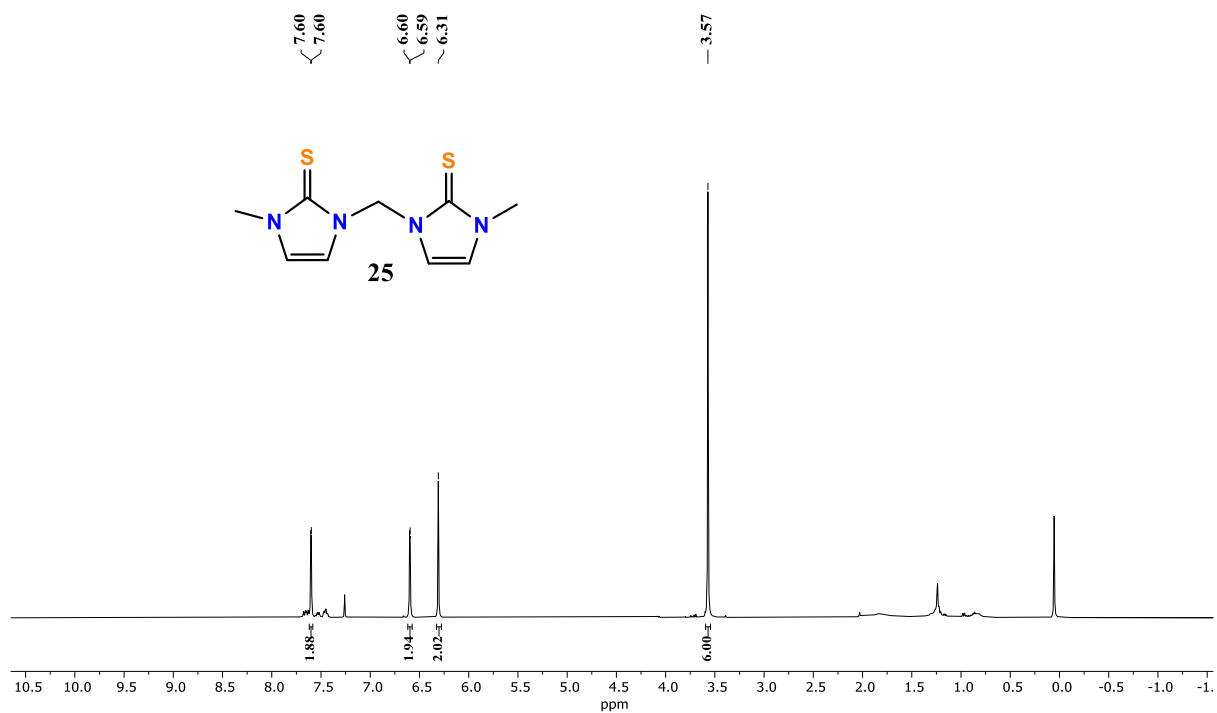

**Fig. S71** <sup>1</sup>H NMR spectrum of **25**.

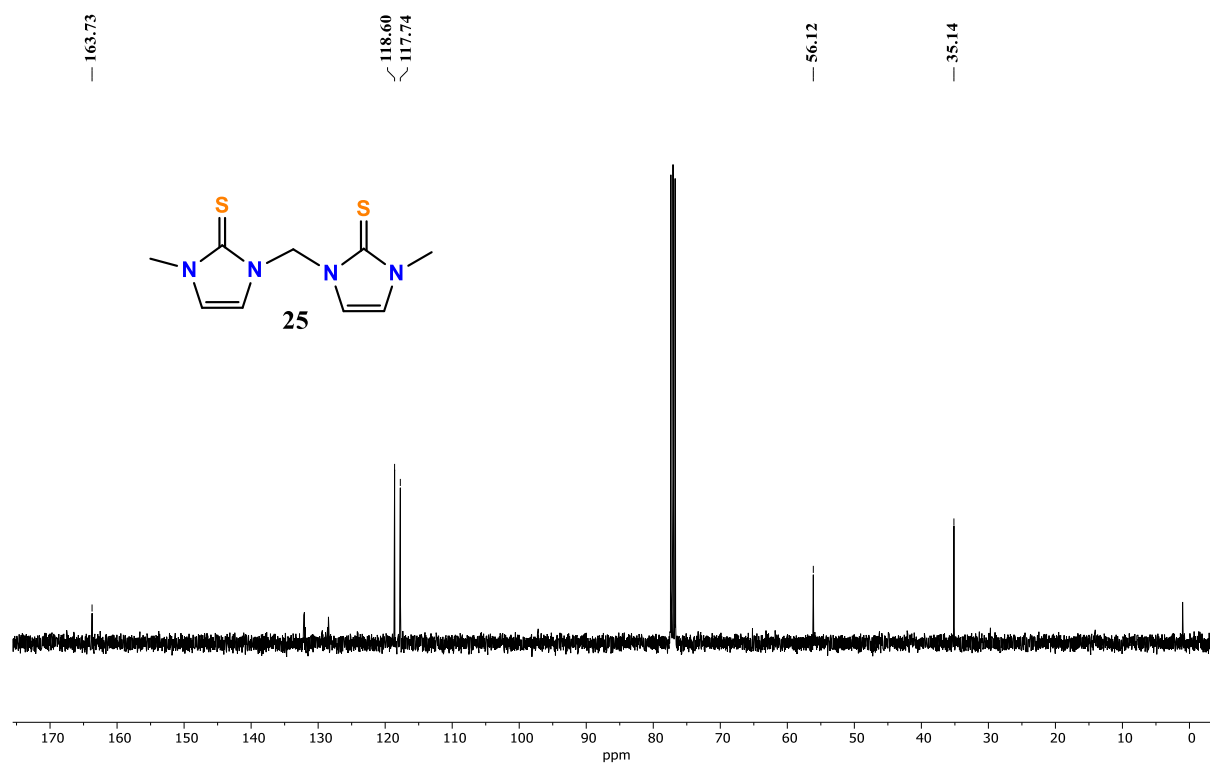

**Fig. S72**  $^{13}\text{C}$  NMR spectrum of **25**.



DEPARTMENT OF CHEMISTRY, I.I.T.(B)

**Analysis Info**

Analysis Name D:\Data\DEC-2019\MSB-SD-5-S2.d  
 Method Tune\_pos\_500\_NAF.m  
 Sample Name MSB-SD-5-S2  
 Comment C9H12N4S1S2

Acquisition Date 12/6/2019 8:59:35 PM

Operator CMRV-OUT  
 Instrument maXis impact 282001.00081

**Acquisition Parameter**

|             |         |                       |           |                  |           |
|-------------|---------|-----------------------|-----------|------------------|-----------|
| Source Type | ESI     | Ion Polarity          | Positive  | Set Nebulizer    | 0.3 Bar   |
| Focus       | Active  | Set Capillary         | 4500 V    | Set Dry Heater   | 180 °C    |
| Scan Begin  | 50 m/z  | Set End Plate Offset  | -500 V    | Set Dry Gas      | 4.0 l/min |
| Scan End    | 500 m/z | Set Collision Cell RF | 800.0 Vpp | Set Divert Valve | Source    |

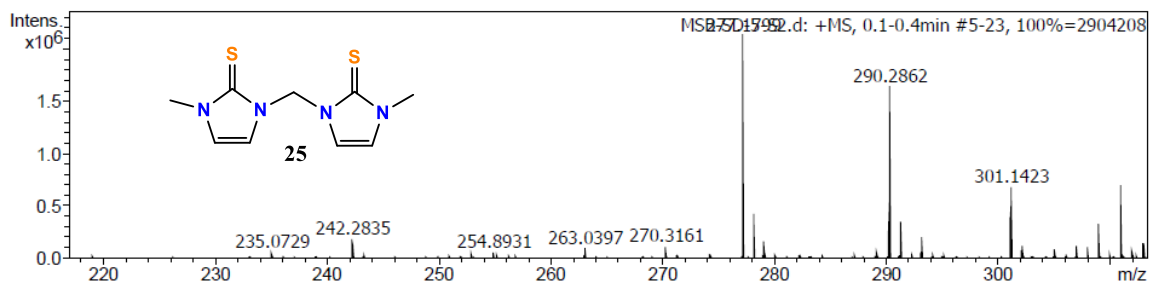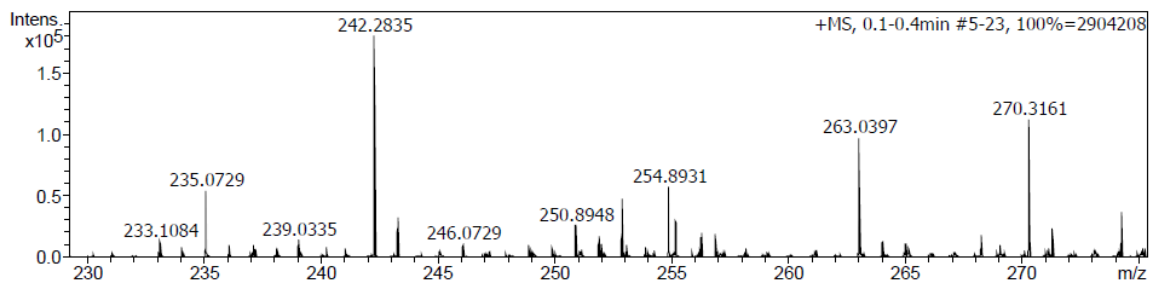

| Meas. m/z | # | Ion Formula | m/z      | err [ppm] | mSigma | # Sigma | Score  | rdb | e <sup>-</sup> Conf | N-Rule |
|-----------|---|-------------|----------|-----------|--------|---------|--------|-----|---------------------|--------|
| 263.0397  | 1 | C9H12N4NaS2 | 263.0396 | 0.6       | 11.2   | 1       | 100.00 | 5.5 | even                | ok     |

**Fig. S73** HRMS spectrum of **25**.

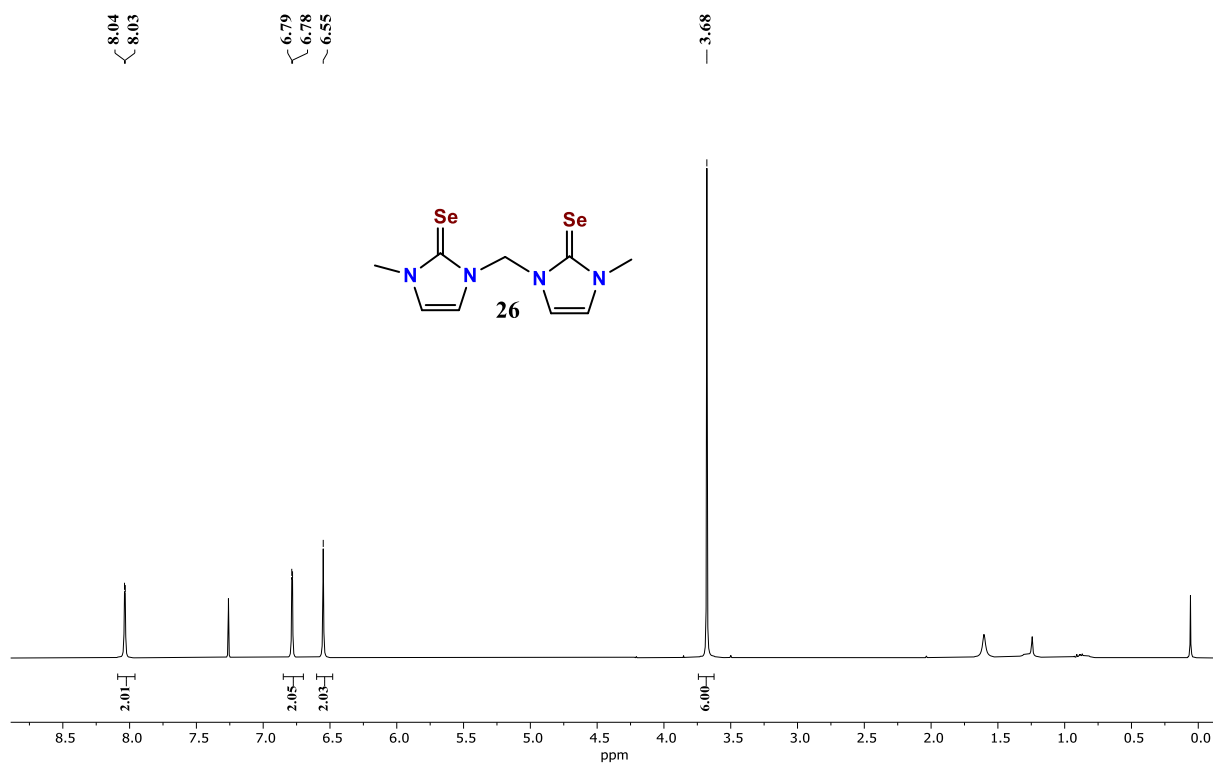

**Fig. S74**  $^1\text{H}$  NMR spectrum of **26**.

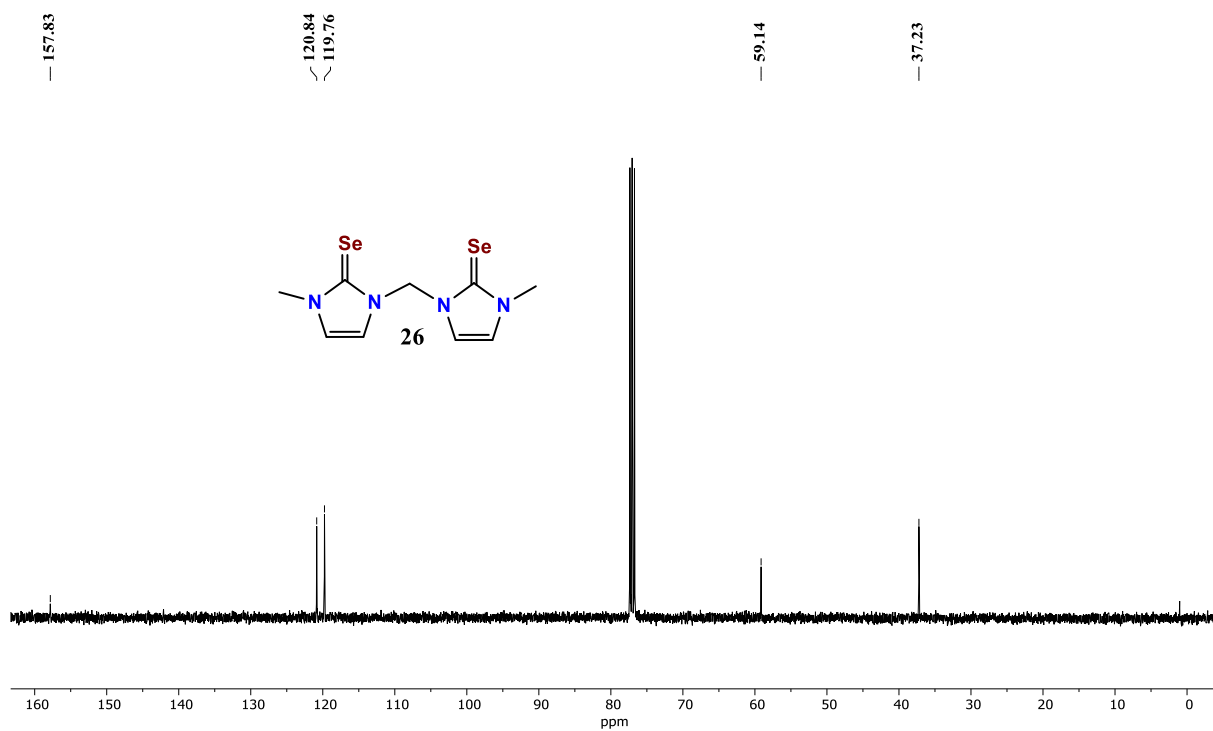

**Fig. S75**  $^{13}\text{C}$  NMR spectrum of **26**.

DEPARTMENT OF CHEMISTRY, I.I.T.(B)

**Analysis Info**

Analysis Name D:\Data\NOV-2019\MSB-SD-44.d  
 Method Tune\_pos\_NAICSI-1000.m  
 Sample Name MSB-SD-44  
 Comment C9H12N4Se2

Acquisition Date 11/26/2019 11:57:22 PM  
 Operator INN-IN  
 Instrument maXis impact 282001.00081

**Acquisition Parameter**

|             |          |                       |            |                  |           |
|-------------|----------|-----------------------|------------|------------------|-----------|
| Source Type | ESI      | Ion Polarity          | Positive   | Set Nebulizer    | 0.3 Bar   |
| Focus       | Active   | Set Capillary         | 4500 V     | Set Dry Heater   | 180 °C    |
| Scan Begin  | 50 m/z   | Set End Plate Offset  | -500 V     | Set Dry Gas      | 4.0 l/min |
| Scan End    | 1000 m/z | Set Collision Cell RF | 1200.0 Vpp | Set Divert Valve | Source    |

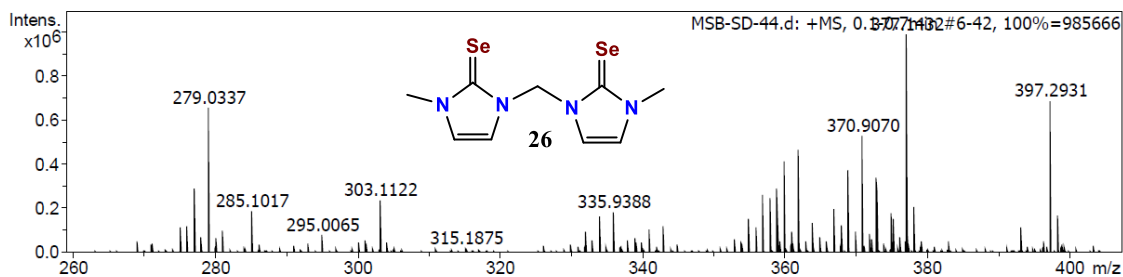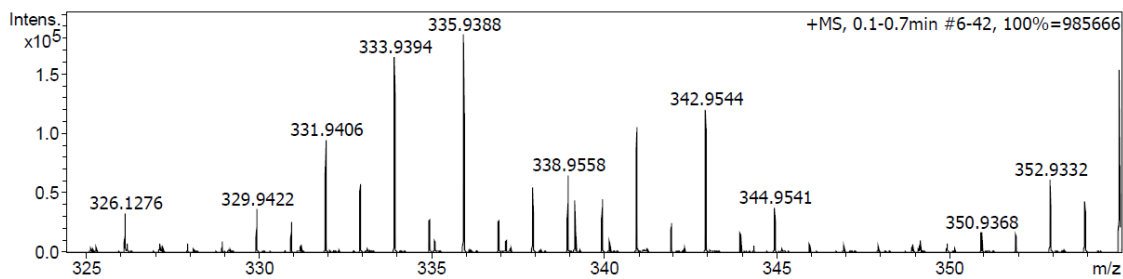

| Meas. m/z | # | Ion Formula | m/z      | err [ppm] | mSigma | # Sigma | Score  | rdb | e <sup>-</sup> Conf | N-Rule |
|-----------|---|-------------|----------|-----------|--------|---------|--------|-----|---------------------|--------|
| 335.9388  | 1 | C9H12N4Se2  | 335.9389 | 0.3       | 14.3   | 1       | 100.00 | 6.0 | odd                 | ok     |

**Fig. S76** HRMS spectrum of **26**.

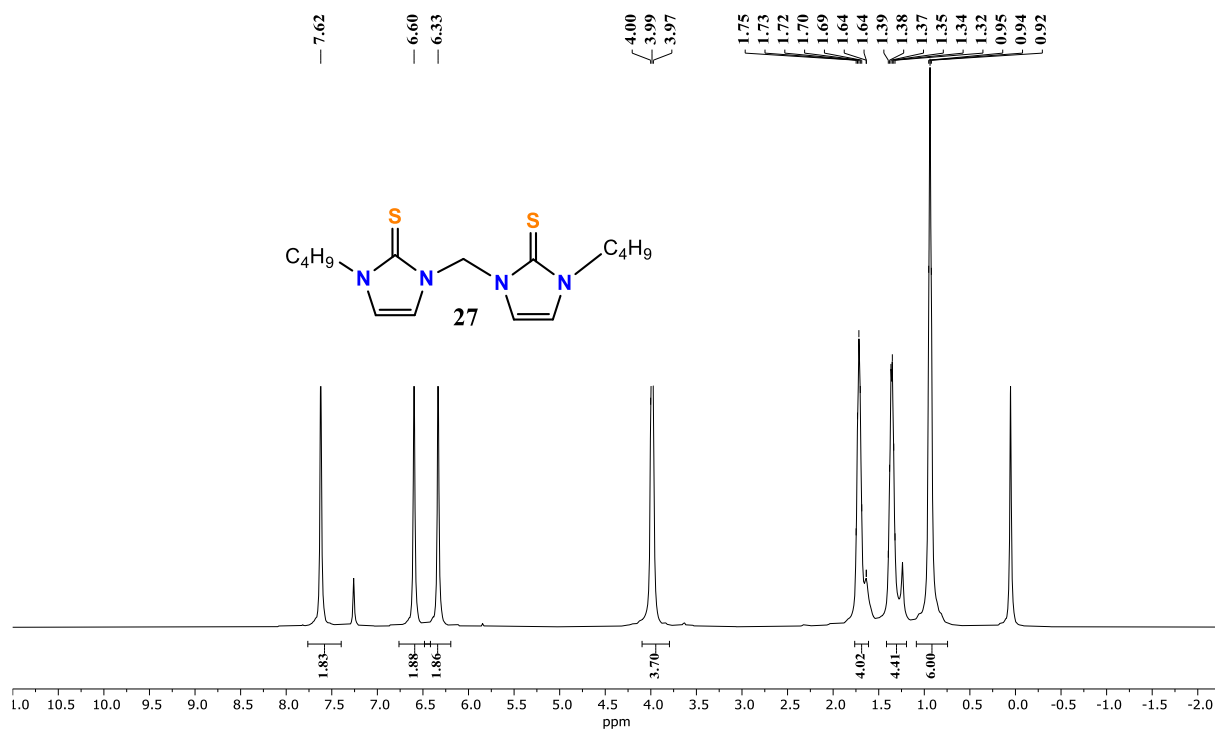

**Fig. S77** <sup>1</sup>H NMR spectrum of **27**.

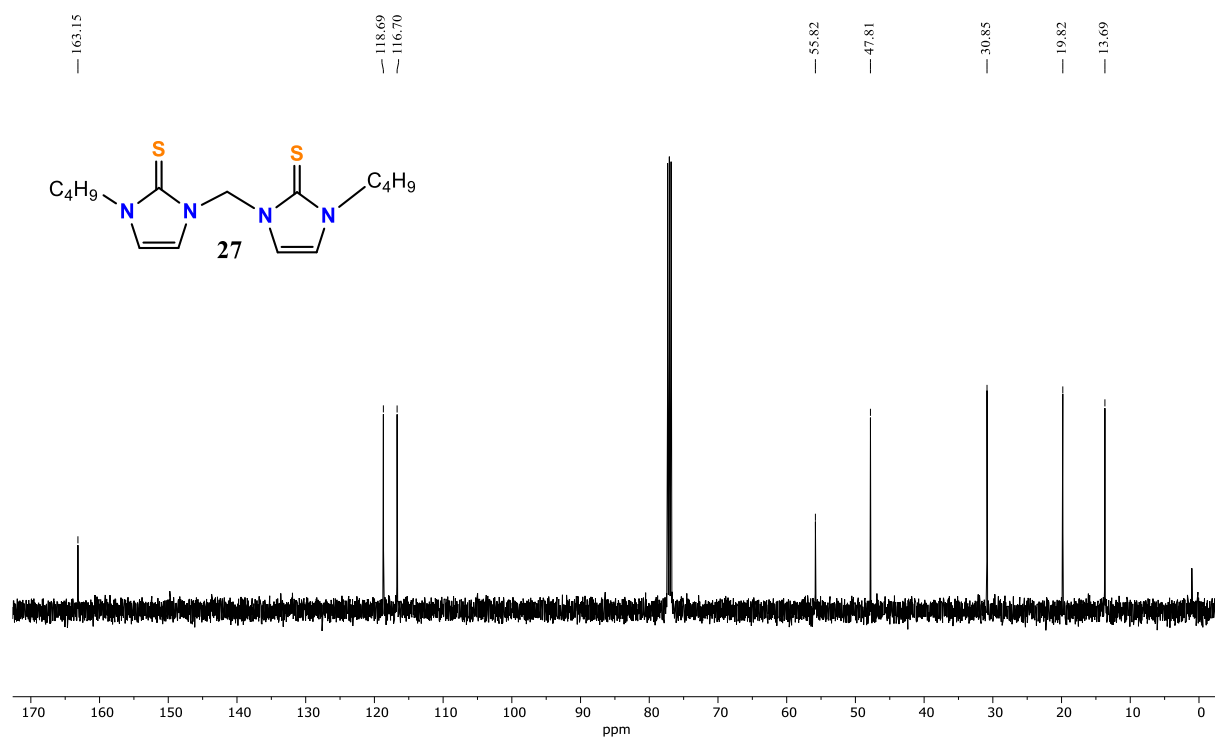

**Fig. S78** <sup>13</sup>C NMR spectrum of **27**.

DEPARTMENT OF CHEMISTRY, I.I.T.(B)

Analysis Info

Analysis Name D:\Data\FEB-2022\MSB-SID-HK-97-A.d  
 Method Naformat\_pos\_1000.m  
 Sample Name MSB-SID-HK-97-A  
 Comment C15H24N4S2

Acquisition Date 2/4/2022 8:12:50 PM

Operator SJGOUT  
 Instrument maXis impact 282001.00081

Acquisition Parameter

|             |            |                      |          |                  |           |
|-------------|------------|----------------------|----------|------------------|-----------|
| Source Type | ESI        | Ion Polarity         | Positive | Set Nebulizer    | 0.3 Bar   |
| Focus       | Not active | Set Capillary        | 3700 V   | Set Dry Heater   | 180 °C    |
| Scan Begin  | 50 m/z     | Set End Plate Offset | -500 V   | Set Dry Gas      | 4.0 l/min |
| Scan End    | 1500 m/z   | Set Charging Voltage | 2000 V   | Set Divert Valve | Source    |
|             |            | Set Corona           | 0 nA     | Set APCI Heater  | 0 °C      |

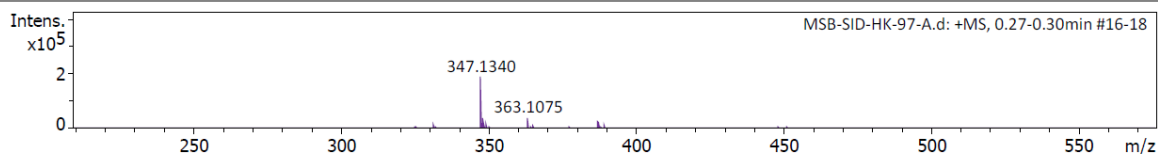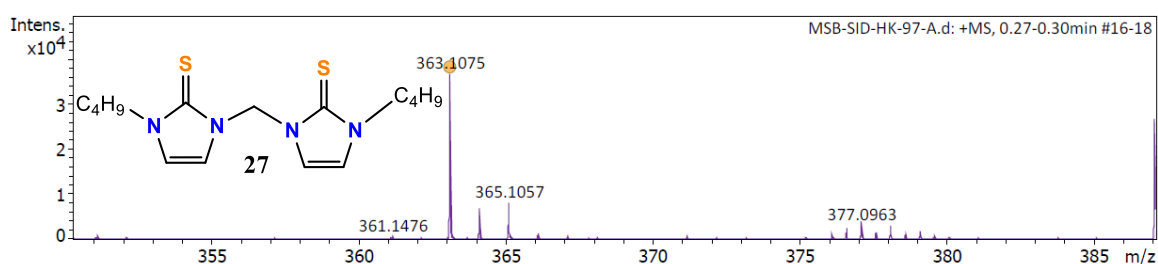

| Meas. m/z | # | Ion Formula | m/z      | err [ppm] | mSigma | # mSigma | Score  | rdb  | e <sup>-</sup> | Conf | N-Rule |
|-----------|---|-------------|----------|-----------|--------|----------|--------|------|----------------|------|--------|
| 363.1075  | 1 | C15H24KN4S2 | 363.1074 | -0.3      | 19.0   | 1        | 100.00 | 10.0 | even           |      | ok     |

Fig. S79 HRMS spectrum of 27.

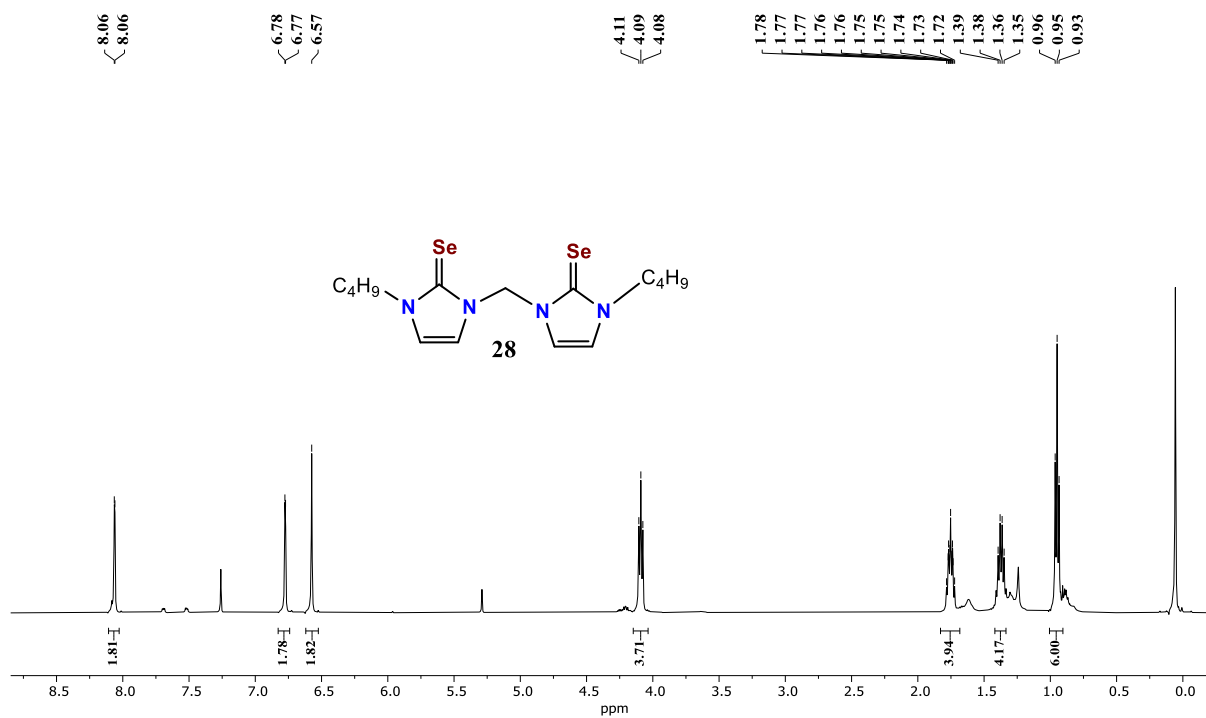

**Fig. S80** <sup>1</sup>H NMR spectrum of **28**.

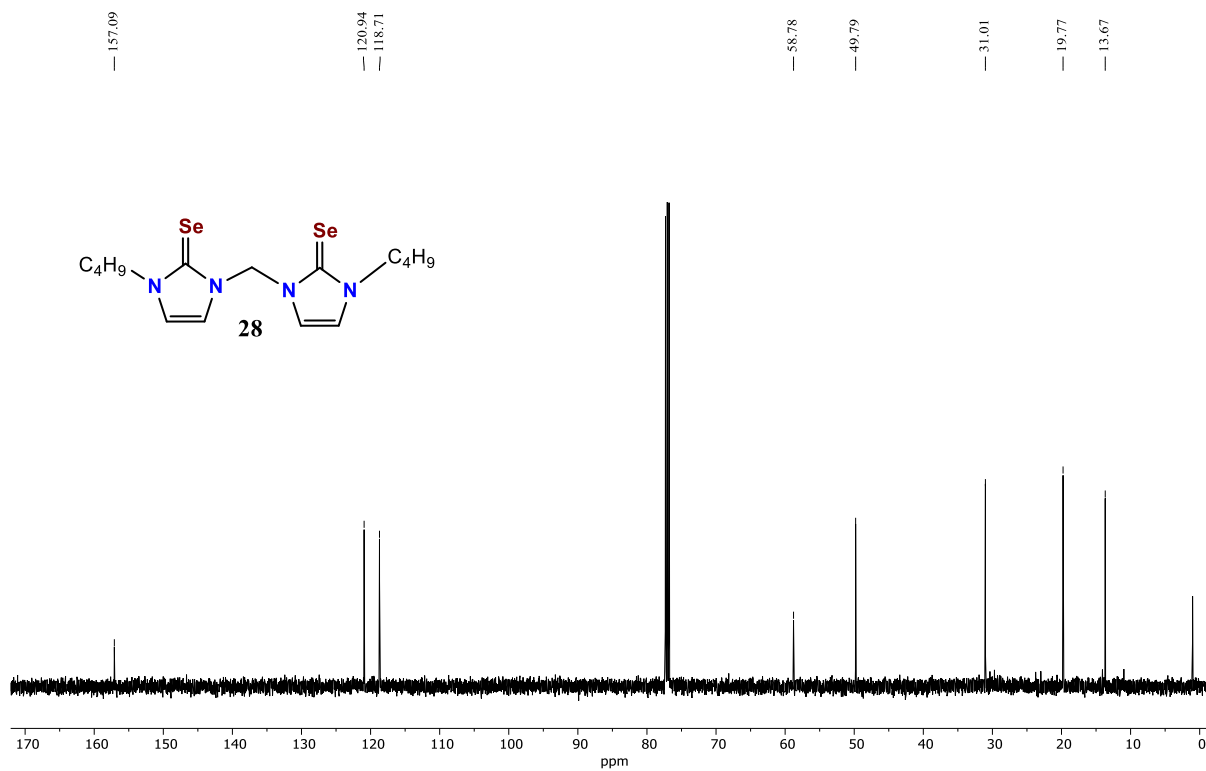

**Fig. S81** <sup>13</sup>C NMR spectrum of **28**.

DEPARTMENT OF CHEMISTRY, I.I.T.(B)

**Analysis Info**

Analysis Name D:\Data\FEB-2022\MSB-SID-HK-98.d  
 Method Low\_mass-NAF.m  
 Sample Name MSB-SID-HK-98  
 Comment C15H24N4Se2

Acquisition Date 2/4/2022 8:24:46 PM  
 Operator SJGOUT  
 Instrument maXis impact 282001.00081

**Acquisition Parameter**

|             |            |                      |          |                  |           |
|-------------|------------|----------------------|----------|------------------|-----------|
| Source Type | ESI        | Ion Polarity         | Positive | Set Nebulizer    | 0.3 Bar   |
| Focus       | Not active | Set Capillary        | 3700 V   | Set Dry Heater   | 180 °C    |
| Scan Begin  | 50 m/z     | Set End Plate Offset | -500 V   | Set Dry Gas      | 4.0 l/min |
| Scan End    | 600 m/z    | Set Charging Voltage | 2000 V   | Set Divert Valve | Source    |
|             |            | Set Corona           | 0 nA     | Set APCI Heater  | 0 °C      |

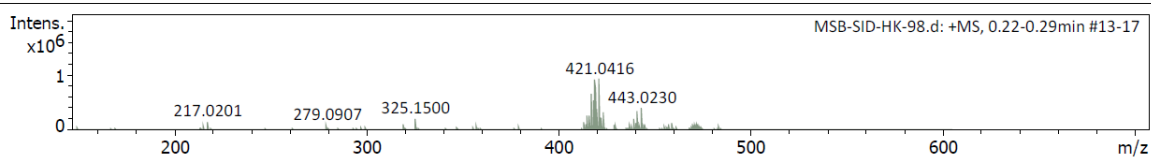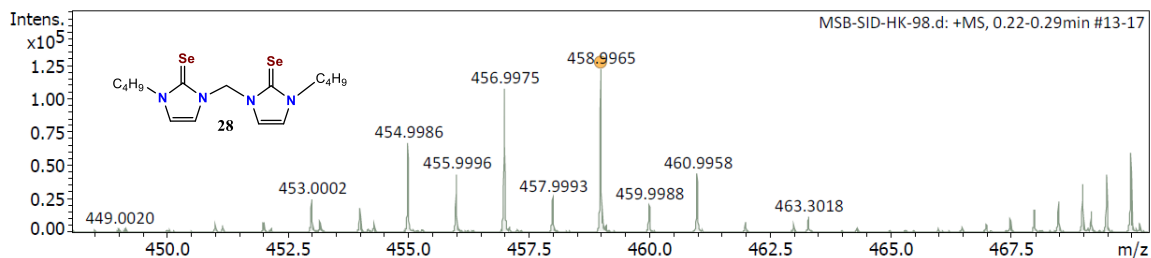

| Meas. m/z | # | Ion Formula  | m/z      | err [ppm] | mSigma | # mSigma | Score  | rdb  | e <sup>-</sup> Conf | N-Rule |
|-----------|---|--------------|----------|-----------|--------|----------|--------|------|---------------------|--------|
| 458.9965  | 1 | C15H24KN4Se2 | 458.9963 | 0.1       | 9.6    | 1        | 100.00 | 10.0 | even                | ok     |

**Fig. S82** HRMS spectrum of **28**.

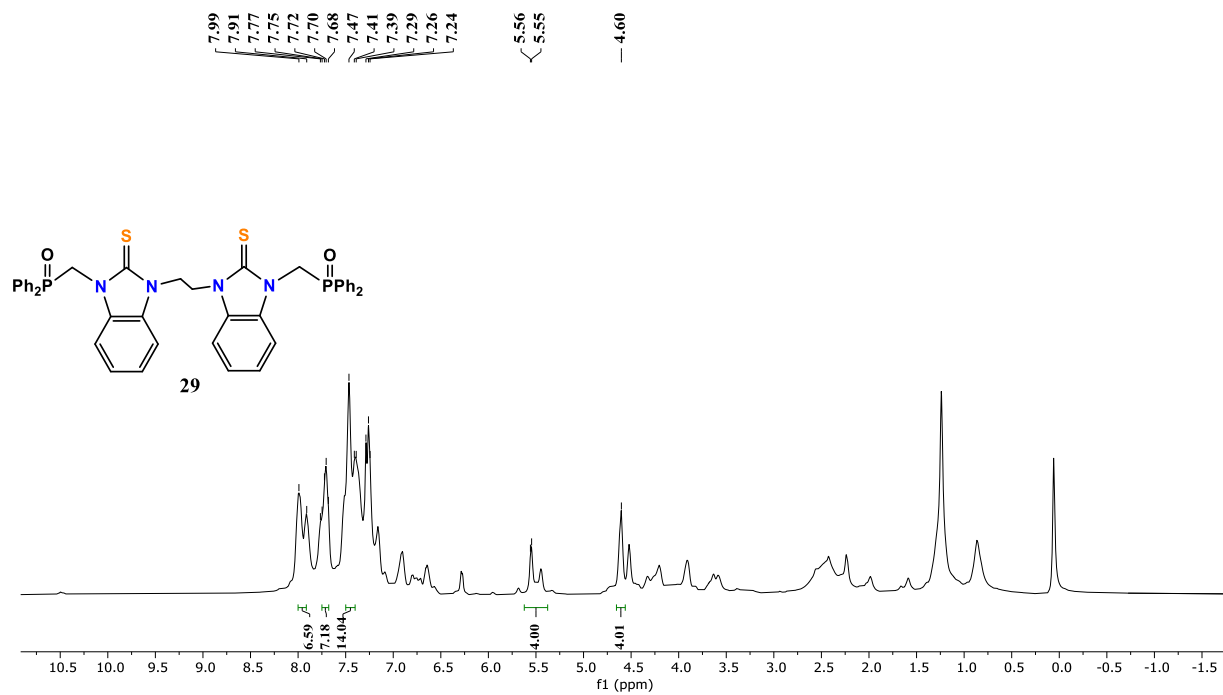

**Fig. S83**  $^1\text{H}$  NMR spectrum of **29**.

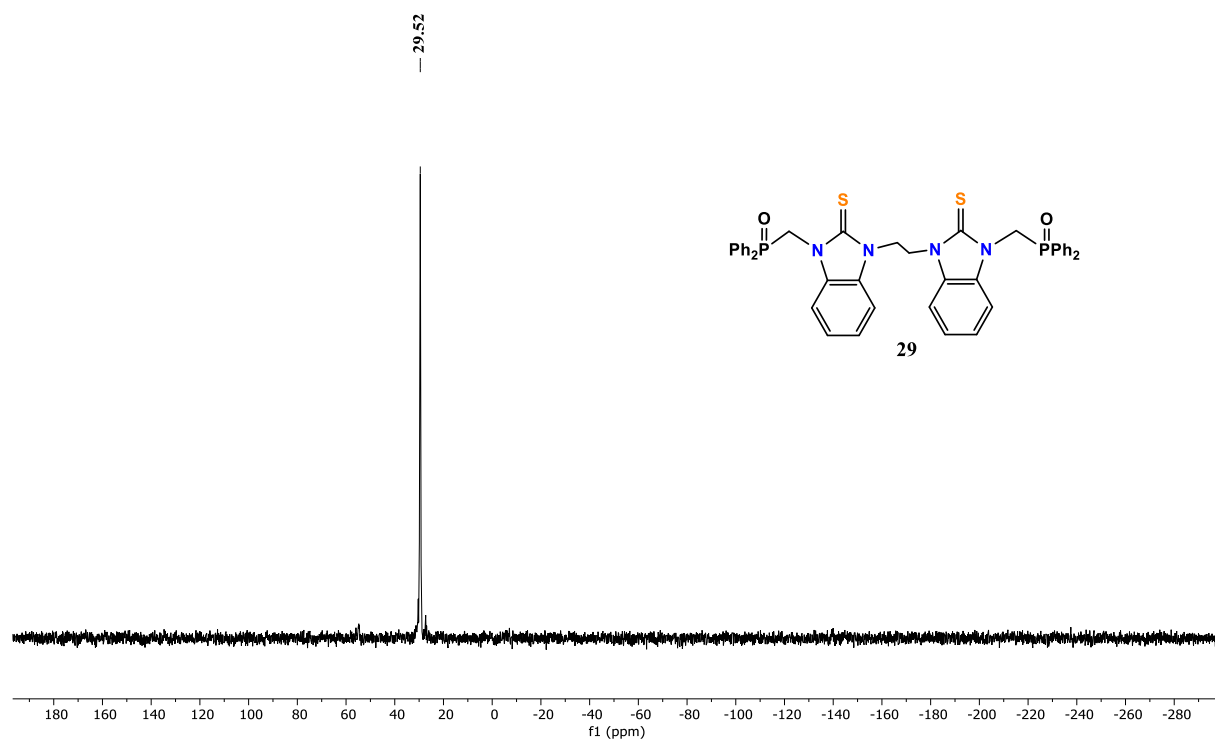

**Fig. S84**  $^{31}\text{P}\{^1\text{H}\}$  NMR Spectrum of **29**.



DEPARTMENT OF CHEMISTRY, I.I.T.(B)

**Analysis Info**

Analysis Name D:\Data\MAR-2020\MSB-SD-HK-95.d  
 Method Tune\_pos\_NAICSI-1500.m  
 Sample Name MSB-SD-HK-95  
 Comment C42H36N4O2P2S2

Acquisition Date 3/12/2020 11:10:35 AM  
 Operator SJG-out  
 Instrument maXis impact 282001.00081

**Acquisition Parameter**

|             |          |                       |            |                  |           |
|-------------|----------|-----------------------|------------|------------------|-----------|
| Source Type | ESI      | Ion Polarity          | Positive   | Set Nebulizer    | 0.3 Bar   |
| Focus       | Active   | Set Capillary         | 4500 V     | Set Dry Heater   | 180 °C    |
| Scan Begin  | 50 m/z   | Set End Plate Offset  | -500 V     | Set Dry Gas      | 4.0 l/min |
| Scan End    | 1500 m/z | Set Collision Cell RF | 1500.0 Vpp | Set Divert Valve | Source    |

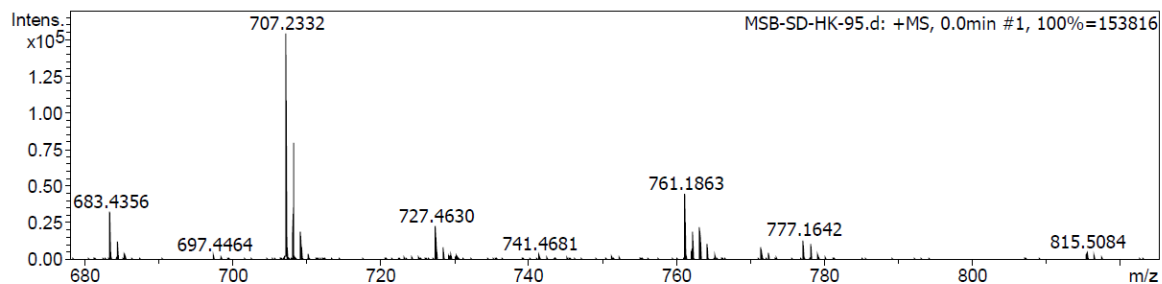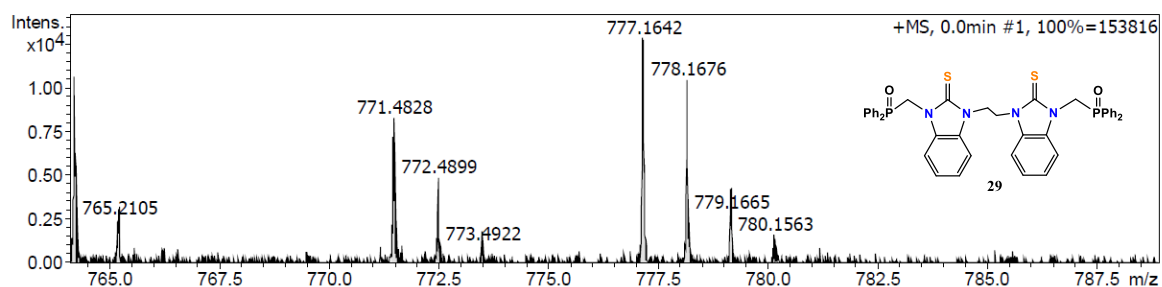

| Meas. m/z | # | Ion Formula      | m/z      | err [ppm] | mSigma | # Sigma | Score  | rdb  | e <sup>-</sup> Conf | N-Rule |
|-----------|---|------------------|----------|-----------|--------|---------|--------|------|---------------------|--------|
| 777.1642  | 1 | C42H36N4NaO2P2S2 | 777.1647 | 0.6       | 148.4  | 1       | 100.00 | 27.5 | even                | ok     |

**Fig. S85** HRMS spectrum of **29**.



DEPARTMENT OF CHEMISTRY, I.I.T.(B)

**Analysis Info**

Analysis Name D:\Data\MAR-2020\MSB-SD-HK-96.d  
 Method Tune\_pos\_NAICSI-1500.m  
 Sample Name MSB-SD-HK-96  
 Comment C42H36N4O2P2Se2

Acquisition Date 3/12/2020 10:41:16 AM

Operator SJG-out  
 Instrument maXis impact 282001.00081

**Acquisition Parameter**

|             |          |                       |            |                  |           |
|-------------|----------|-----------------------|------------|------------------|-----------|
| Source Type | ESI      | Ion Polarity          | Positive   | Set Nebulizer    | 0.3 Bar   |
| Focus       | Active   | Set Capillary         | 4500 V     | Set Dry Heater   | 180 °C    |
| Scan Begin  | 50 m/z   | Set End Plate Offset  | -500 V     | Set Dry Gas      | 4.0 l/min |
| Scan End    | 1500 m/z | Set Collision Cell RF | 1500.0 Vpp | Set Divert Valve | Source    |

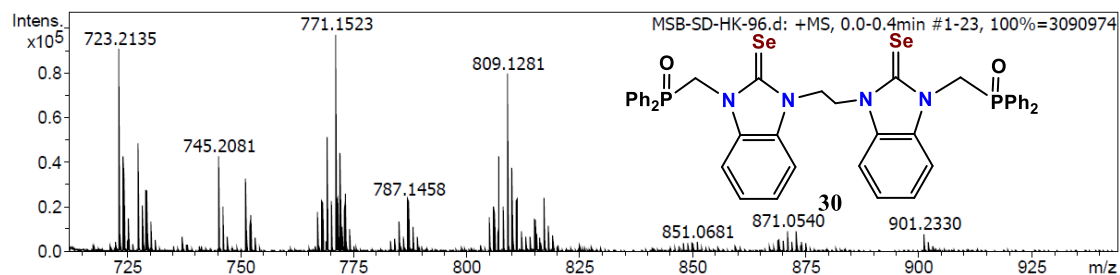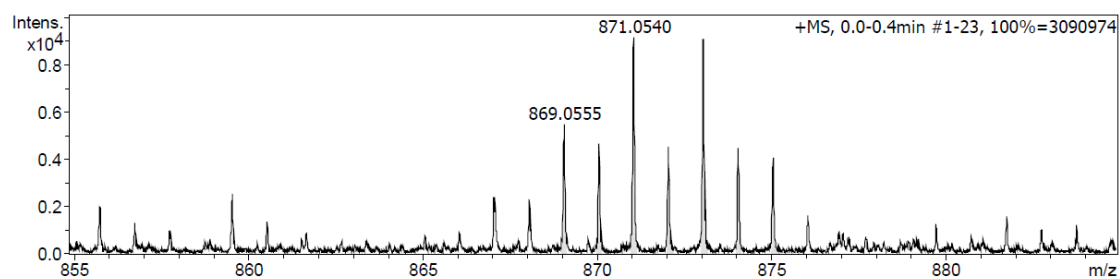

| Meas. m/z | # | Ion Formula       | m/z      | err [ppm] | mSigma | # Sigma | Score  | rdb  | e <sup>-</sup> Conf | N-Rule |
|-----------|---|-------------------|----------|-----------|--------|---------|--------|------|---------------------|--------|
| 850.0648  | 1 | C42H36N4O2P2Se2   | 850.0648 | 0.0       | 285.2  | 1       | 100.00 | 28.0 | odd                 | ok     |
|           | 1 | C42H36N4O2P2Se2   | 850.0648 | 0.0       | 285.2  | 1       | 100.00 | 28.0 | odd                 | ok     |
|           | 1 | C42H36N4O2P2Se2   | 850.0648 | 0.0       | 285.2  | 1       | 100.00 | 28.0 | odd                 | ok     |
|           | 1 | C42H36N4O2P2Se2   | 850.0648 | 0.0       | 285.2  | 1       | 100.00 | 28.0 | odd                 | ok     |
| 873.0520  | 1 | C42H36N4NaO2P2Se2 | 873.0546 | -3.0      | 91.5   | 1       | 100.00 | 27.5 | even                | ok     |

**Fig. S88** HRMS spectrum of **30**.

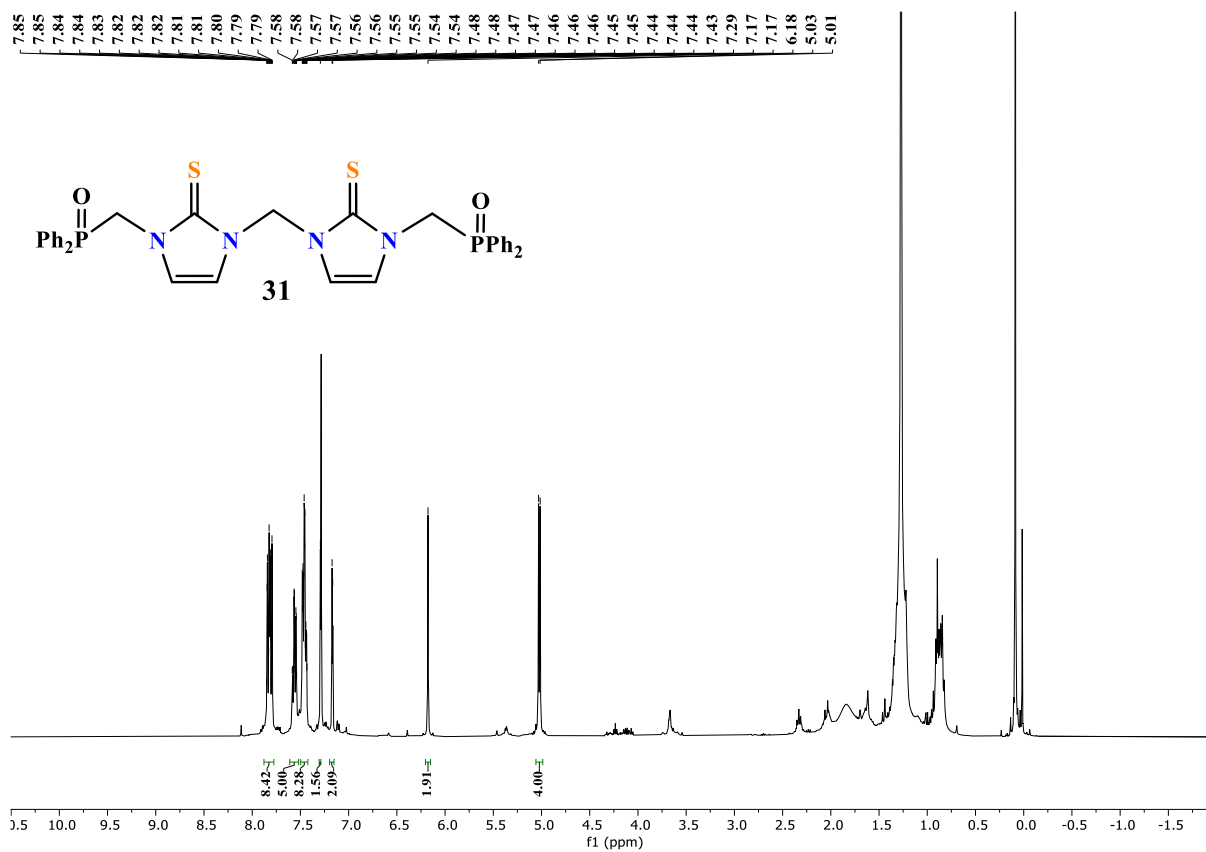

Fig. S89 <sup>1</sup>H NMR spectrum of **31**.

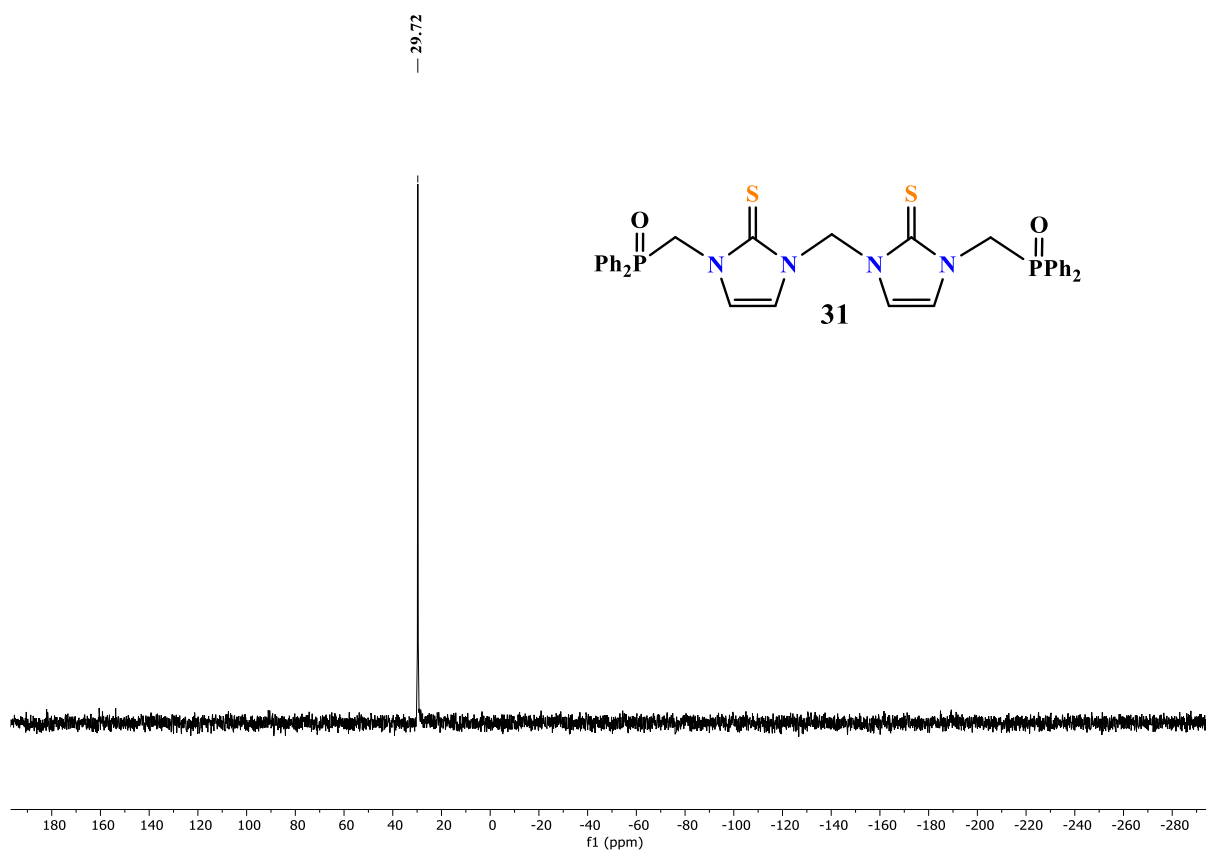

Fig. S90 <sup>31</sup>P{<sup>1</sup>H} NMR spectrum of **31**.



DEPARTMENT OF CHEMISTRY, I.I.T.(B)

Analysis Info

Analysis Name D:\Data\JAN-2022\MSB-SID-HK-104.d  
 Method NaICSI\_pos\_1000-a.m  
 Sample Name MSB-SID-HK-104  
 Comment C33H30O2P2S2N4

Acquisition Date 1/21/2022 8:34:54 PM  
 Operator SJG-IN  
 Instrument maXis impact 282001.00081

Acquisition Parameter

|             |            |                      |          |                  |           |
|-------------|------------|----------------------|----------|------------------|-----------|
| Source Type | ESI        | Ion Polarity         | Positive | Set Nebulizer    | 0.3 Bar   |
| Focus       | Not active | Set Capillary        | 3700 V   | Set Dry Heater   | 180 °C    |
| Scan Begin  | 50 m/z     | Set End Plate Offset | -500 V   | Set Dry Gas      | 4.0 l/min |
| Scan End    | 1000 m/z   | Set Charging Voltage | 2000 V   | Set Divert Valve | Source    |
|             |            | Set Corona           | 0 nA     | Set APCI Heater  | 0 °C      |

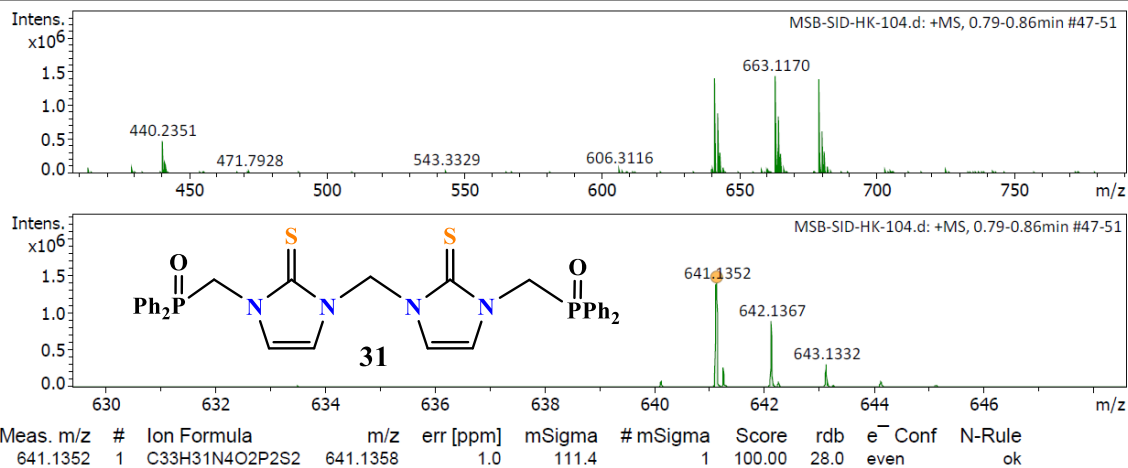

Fig. S92 HRMS spectrum of **31**.

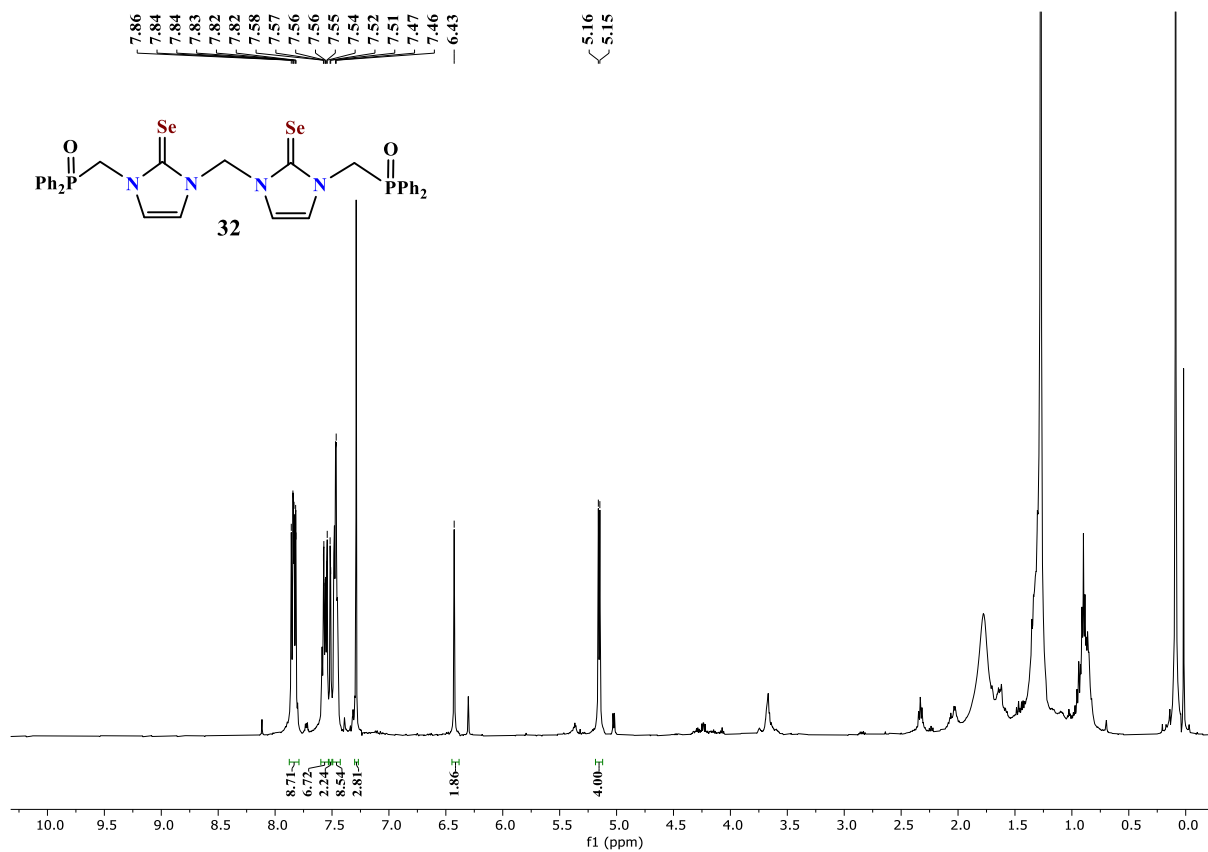

**Fig. S93**  $^1\text{H}$  NMR spectrum of **32**.

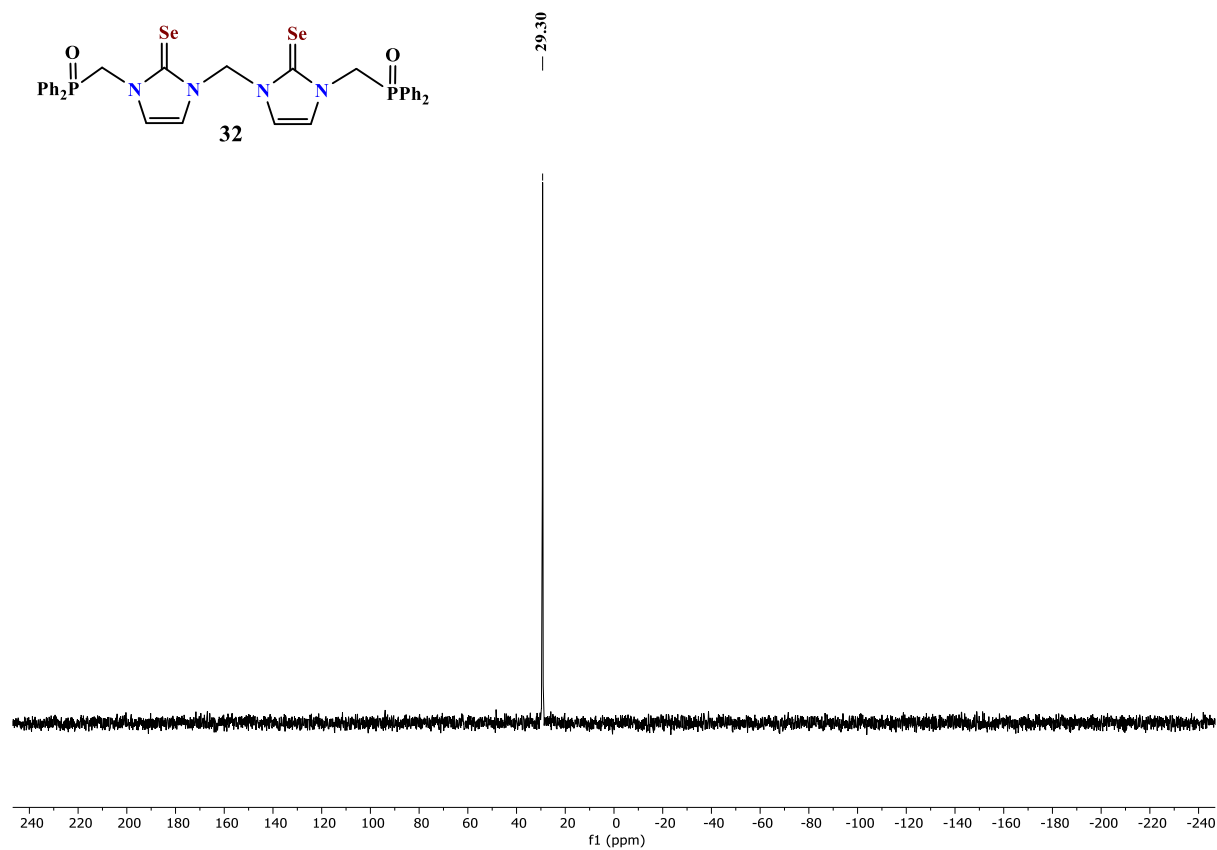

Fig. S94  $^{31}\text{P}\{^1\text{H}\}$  NMR spectrum of **32**.

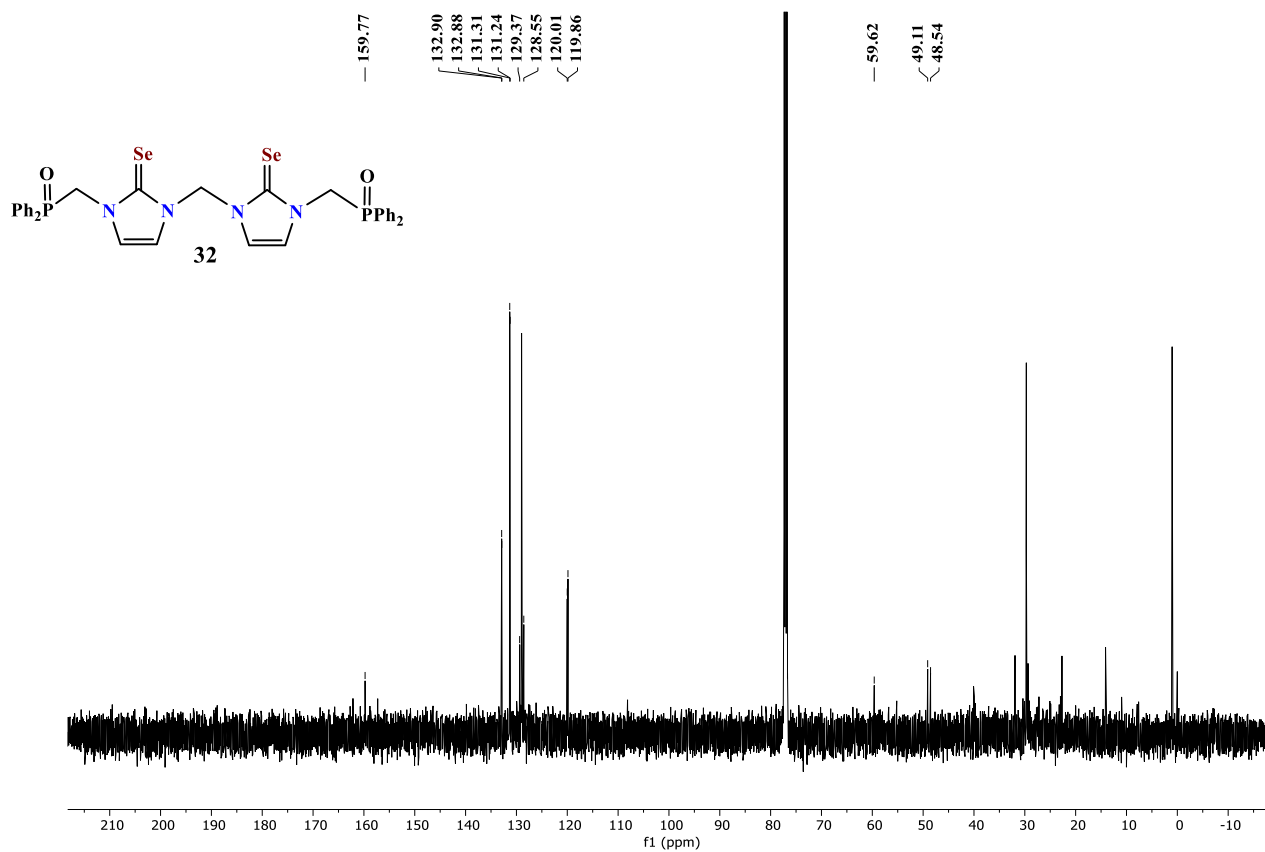



**Fig. S95**  $^{13}\text{C}$  NMR spectrum of **32**.

| DEPARTMENT OF CHEMISTRY, I.I.T.(B) |                                   |                      |                                       |                           |           |
|------------------------------------|-----------------------------------|----------------------|---------------------------------------|---------------------------|-----------|
| <b>Analysis Info</b>               |                                   |                      | Acquisition Date 1/21/2022 8:27:45 PM |                           |           |
| Analysis Name                      | D:\Data\JAN-2022\MSB-SID-HK-105.d |                      | Operator                              | SJG-IN                    |           |
| Method                             | NaICsI_pos_1000-a.m               |                      | Instrument                            | maXis impact 282001.00081 |           |
| Sample Name                        | MSB-SID-HK-105                    |                      |                                       |                           |           |
| Comment                            | C33H30O2P2Se2N4                   |                      |                                       |                           |           |
| <b>Acquisition Parameter</b>       |                                   |                      |                                       |                           |           |
| Source Type                        | ESI                               | Ion Polarity         | Positive                              | Set Nebulizer             | 0.3 Bar   |
| Focus                              | Not active                        | Set Capillary        | 3700 V                                | Set Dry Heater            | 180 °C    |
| Scan Begin                         | 50 m/z                            | Set End Plate Offset | -500 V                                | Set Dry Gas               | 4.0 l/min |
| Scan End                           | 1000 m/z                          | Set Charging Voltage | 2000 V                                | Set Divert Valve          | Source    |
|                                    |                                   | Set Corona           | 0 nA                                  | Set APCI Heater           | 0 °C      |

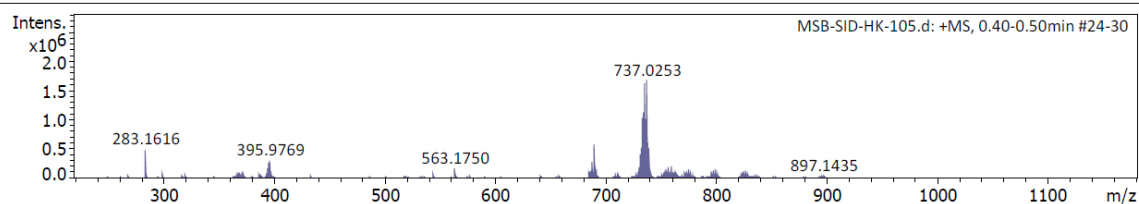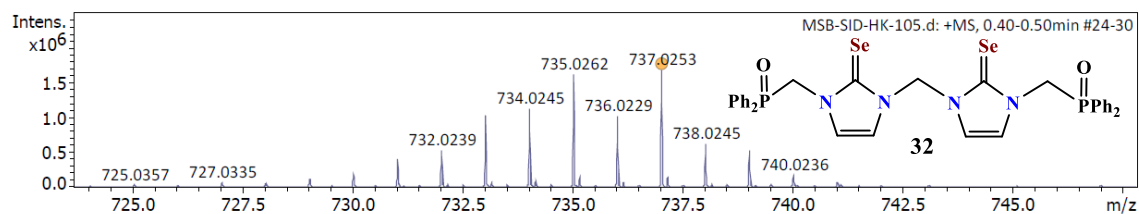

| Meas. m/z | # | Ion Formula     | m/z      | err [ppm] | mSigma | # mSigma | Score  | rdb  | e <sup>-</sup> Conf | N-Rule |
|-----------|---|-----------------|----------|-----------|--------|----------|--------|------|---------------------|--------|
| 737.0253  | 1 | C33H31N4O2P2Se2 | 737.0247 | 0.1       | 99.5   | 1        | 100.00 | 28.0 | even                | ok     |

**Fig. S96** HRMS spectrum of **32**.

DEPARTMENT OF CHEMISTRY, I.I.T.(B)

**Analysis Info**

Analysis Name D:\Data\DEC-2019\MSB-SD-50.d  
 Method Tune\_pos\_500\_NAF.m  
 Sample Name MSB-SD-50  
 Comment C9H12N4S1Se1

Acquisition Date 12/6/2019 8:46:27 PM  
 Operator CMRV-OUT  
 Instrument maXis impact 282001.0008

**Acquisition Parameter**

|             |         |                       |           |                  |           |
|-------------|---------|-----------------------|-----------|------------------|-----------|
| Source Type | ESI     | Ion Polarity          | Positive  | Set Nebulizer    | 0.3 Bar   |
| Focus       | Active  | Set Capillary         | 4500 V    | Set Dry Heater   | 180 °C    |
| Scan Begin  | 50 m/z  | Set End Plate Offset  | -500 V    | Set Dry Gas      | 4.0 l/min |
| Scan End    | 500 m/z | Set Collision Cell RF | 800.0 Vpp | Set Divert Valve | Source    |

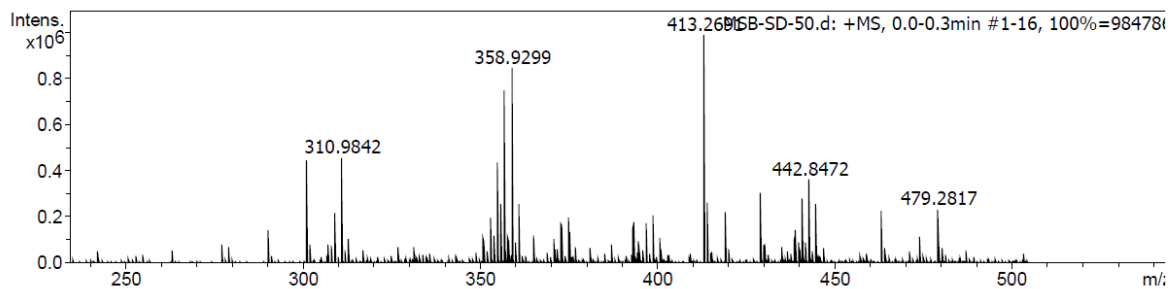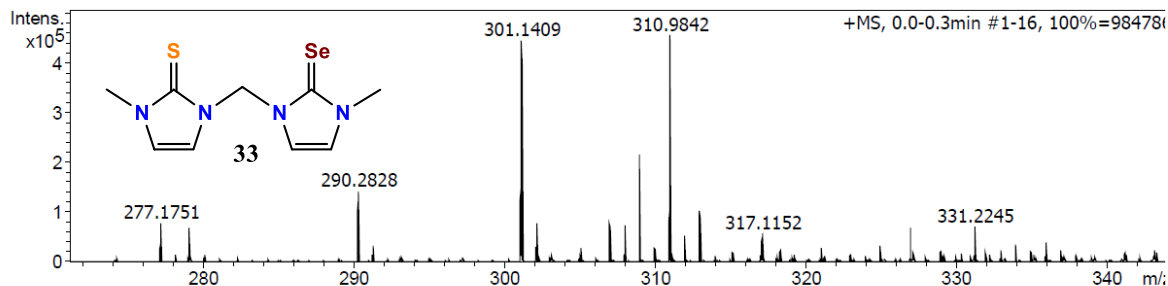

| Meas. m/z | # | Ion Formula  | m/z      | err [ppm] | mSigma | # Sigma | Score  | rdb | e <sup>-</sup> Conf | N-Rule |
|-----------|---|--------------|----------|-----------|--------|---------|--------|-----|---------------------|--------|
| 310.9842  | 1 | C9H12N4NaSSe | 310.9840 | -0.9      | 8.5    | 1       | 100.00 | 5.5 | even                | ok     |

**Fig. S97** HRMS spectrum of **33**.

DEPARTMENT OF CHEMISTRY, I.I.T.(B)

Analysis Info

Analysis Name D:\Data\APR-2022\MSB-SID-HK-107-B.d  
 Method NaICsl\_pos\_1500hplc.m  
 Sample Name MSB-SID-HK-107-B  
 Comment C42H36N4O2P2S1Se1

Acquisition Date 4/5/2022 6:40:22 PM

Operator SJG OUT  
 Instrument maXis impact 282001.00081

Acquisition Parameter

|             |            |                      |          |                  |           |
|-------------|------------|----------------------|----------|------------------|-----------|
| Source Type | ESI        | Ion Polarity         | Positive | Set Nebulizer    | 0.4 Bar   |
| Focus       | Not active | Set Capillary        | 3700 V   | Set Dry Heater   | 200 °C    |
| Scan Begin  | 50 m/z     | Set End Plate Offset | -500 V   | Set Dry Gas      | 4.5 l/min |
| Scan End    | 1500 m/z   | Set Charging Voltage | 2000 V   | Set Divert Valve | Source    |
|             |            | Set Corona           | 0 nA     | Set APCI Heater  | 0 °C      |

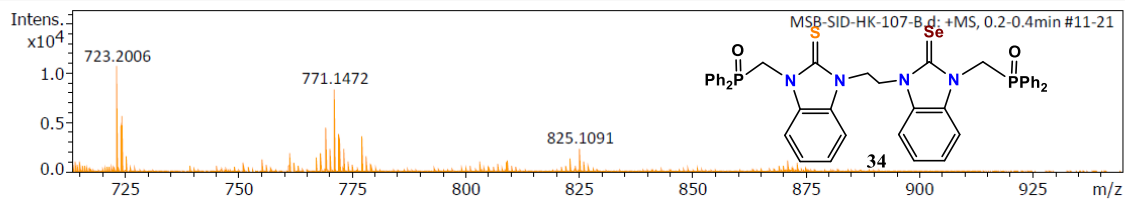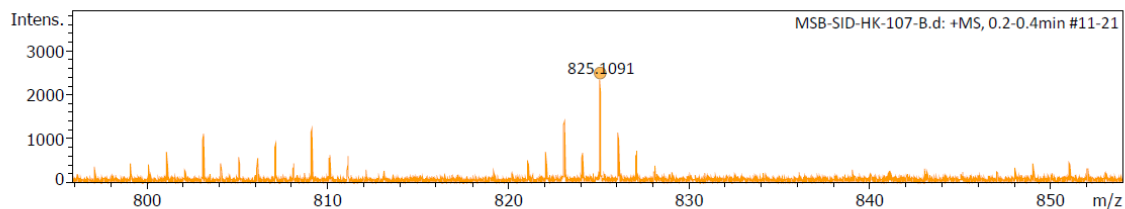

| Meas. m/z | # | Ion Formula       | m/z      | err [ppm] | mSigma | # mSigma | Score  | rdb  | e <sup>-</sup> Conf | N-Rule |
|-----------|---|-------------------|----------|-----------|--------|----------|--------|------|---------------------|--------|
| 825.1091  | 1 | C42H36N4NaO2P2SSe | 825.1092 | 0.5       | n.a.   | 1        | 100.00 | 34.0 | even                | ok     |

Fig. S98 HRMS spectrum of **34**.

DEPARTMENT OF CHEMISTRY, I.I.T.(B)

**Analysis Info**

Analysis Name D:\Data\AUG 2021\MSB-SID-HK-106.d  
 Method Naformat\_pos\_1000a.m  
 Sample Name MSB-SID-HK-106  
 Comment C33H30O2P2SSeN4

Acquisition Date 8/12/2021 3:15:03 AM

Operator MSB-OUT  
 Instrument maXis impact 282001.00081

**Acquisition Parameter**

|             |            |                      |          |                  |           |
|-------------|------------|----------------------|----------|------------------|-----------|
| Source Type | ESI        | Ion Polarity         | Positive | Set Nebulizer    | 0.3 Bar   |
| Focus       | Not active | Set Capillary        | 4000 V   | Set Dry Heater   | 180 °C    |
| Scan Begin  | 50 m/z     | Set End Plate Offset | -500 V   | Set Dry Gas      | 4.0 l/min |
| Scan End    | 1000 m/z   | Set Charging Voltage | 2000 V   | Set Divert Valve | Source    |
|             |            | Set Corona           | 0 nA     | Set APCI Heater  | 0 °C      |

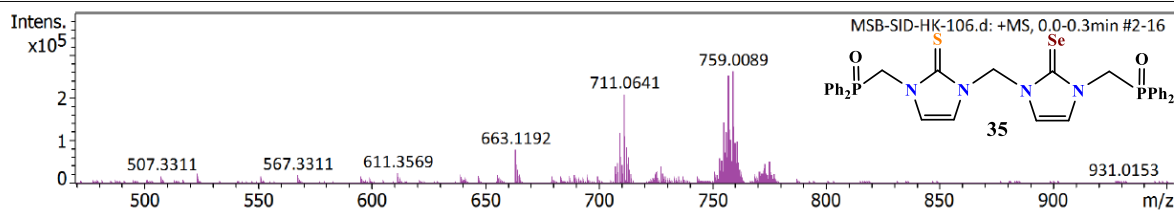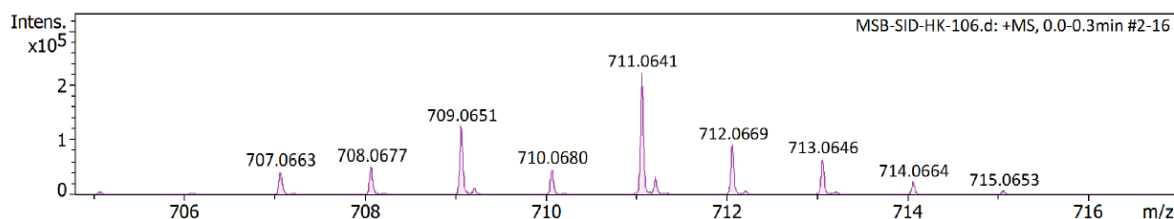

| Meas. m/z | # | Ion Formula       | m/z      | err [ppm] | mSigma | # mSigma | Score  | rdb  | e <sup>-</sup> Conf | N-Rule |
|-----------|---|-------------------|----------|-----------|--------|----------|--------|------|---------------------|--------|
| 709.0651  | 1 | C33H30N4NaO2P2SSe | 711.0622 | -1.9      | 13.8   | 1        | 100.00 | 28.0 | even                | ok     |

**Fig. S99** HRMS spectrum of **35**.

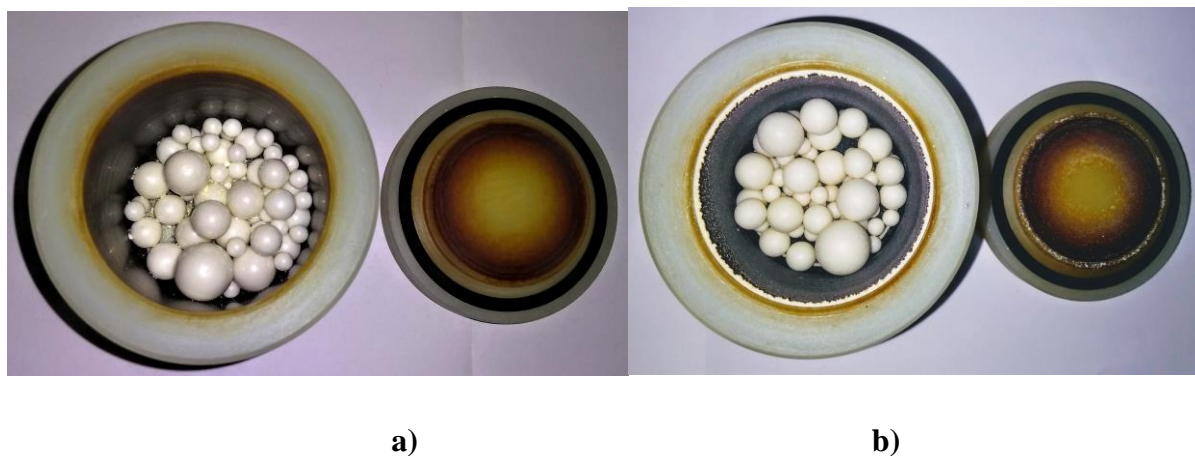

**Fig. S100** Synthesis of thiones a) before the synthesis b) after the synthesis

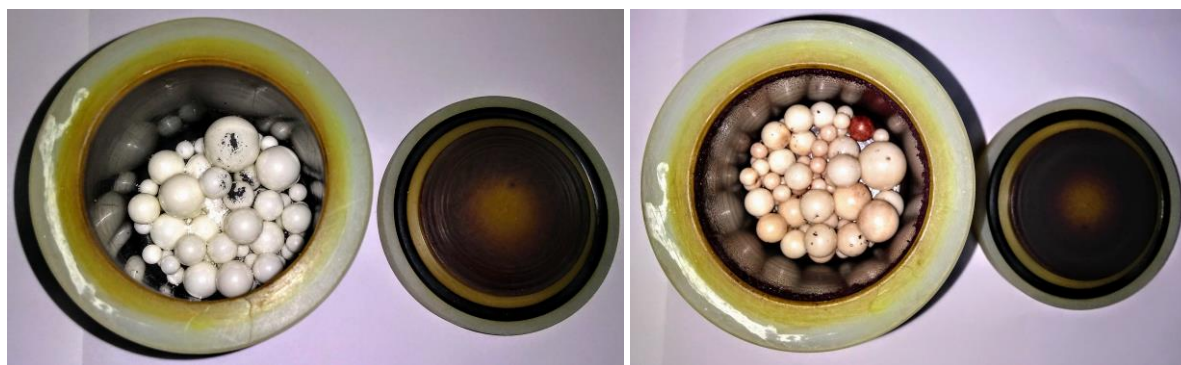

a)

b)

**Fig. S101 Synthesis of selones a) before the synthesis b) after the synthesis**

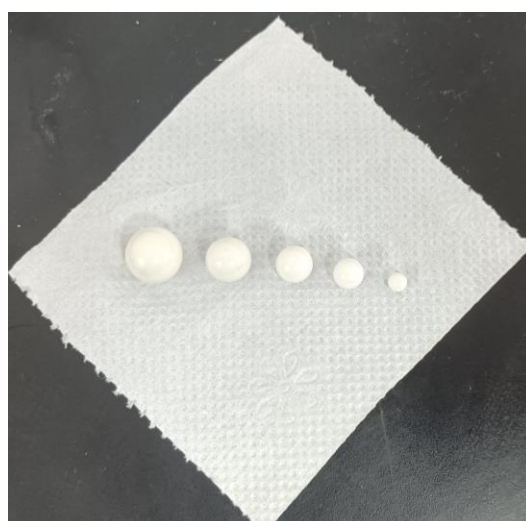

**Fig. S102 Different sized balls used in the current work for efficient grinding.**

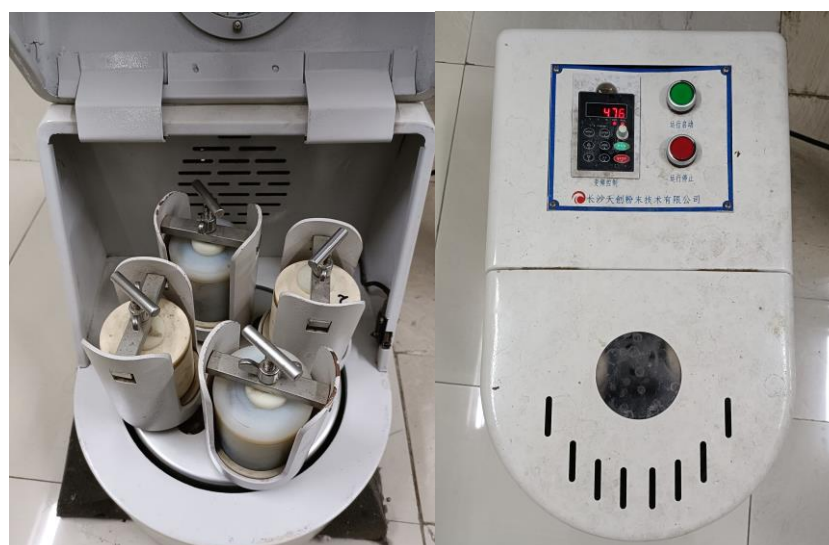

**Fig. S103 Ball-milling machine used in the current study.**

## References:

- 1 O. V. Dolomanov, L. J. Bourhis, R. J. Gildea, J. A. K. Howard and H. Puschmann, *J. Appl. Cryst.*, 2009, **42**, 339-341.
- 2 G. M. Sheldrick, *Acta Crystallogr., Sect. A: Found. Crystallogr.*, 2015, **71**, 3-8.
- 3 G. Sheldrick, *Acta Crystallogr., Sect. C: Struct. Chem.*, 2015, **71**, 3-8.
